# Supplementary material for: Transforming electron-rich hetero-buckybowls into electron-deficient polycycles
Source: Royal Society of Chemistry journal article supplement (doi:10.1039/d1qo00702e), 2021-01-01

# Supporting information

## Table of contents

|                                                                              |    |
|------------------------------------------------------------------------------|----|
| 1. Materials and General methods.....                                        | 2  |
| 2. Synthesis .....                                                           | 3  |
| 3. Crystal Structure Analysis.....                                           | 14 |
| 3.1 Experimental details on crystal growth.....                              | 14 |
| 4. Photophysical Study.....                                                  | 17 |
| 4.1 Spectroelectrochemistry of 3, 4, 5, 6 9 and 10.....                      | 17 |
| 4.2 UV-Vis spectra .....                                                     | 21 |
| 4.3 Fluorescence.....                                                        | 22 |
| 5. Thermogravimetric Analyses (TGA) .....                                    | 24 |
| 6. Electrochemical spectra .....                                             | 25 |
| 7. Theoretical calculations .....                                            | 29 |
| 7.1 Optimized Structures, Molecular Orbitals and Corresponding Energies..... | 31 |
| 7.2 UV-Vis Absorption Spectra Calculation .....                              | 40 |
| 8. Complexation measurements of 18-21 with HBT .....                         | 69 |
| 9. References:.....                                                          | 74 |
| 10. <sup>1</sup> H NMR, <sup>13</sup> C NMR and IR Spectra of Products.....  | 75 |

## 1. Materials and General methods

All chemicals and solvents were purified according to the standard procedure.<sup>[S1]</sup> The compounds(1, 2, 7, 8, 22, 23, 24, and 25) were synthesized according to our previous reports.<sup>[S2]</sup>

The melting points were determined on a WRS-2 melting point apparatus. Thermogravimetric analyses (TGA) were conducted on 1090B type thermal analyzer (Dupont Engineering Polymers). The high resolution mass spectral analysis (HRMS) was carried out on Bruker APEX II type mass spectrometer. The infrared (IR) spectra were recorded on the PerkinElmer Spectrum 400 spectrometer with the resolution of  $2\text{ cm}^{-1}$ .

The  $^1\text{H}$  NMR,  $^{13}\text{C}$  NMR spectra were recorded on a Bruker Advance III 400 MHz(100 MHz for  $^{13}\text{C}$  NMR) or a VARIAN INOVA 600MHz (150 MHz for  $^{13}\text{C}$  NMR) spectrometer. Chemical shifts for  $^1\text{H}$  NMR spectra are reported in parts per million (ppm,  $\delta$  scale) downfield from tetramethylsilane, and referenced internally to the residual proton in the solvent ( $\text{CDCl}_3$ :  $\delta$  7.27,  $\text{D}_8$ -THF:3.58). Chemical shifts for  $^{13}\text{C}$  NMR spectra are reported in parts per million (ppm,  $\delta$  scale) downfield from tetramethylsilane, and are referenced to the  $^{13}\text{C}$  resonance of the NMR solvent ( $\text{CDCl}_3$ :  $\delta$  77.00,  $\text{D}_8$ -THF:  $\delta$ 67.00). Data are reported as follows: Chemical shift, multiplicity (s = singlet, d = doublet, t = triplet, q = quartet, m = multiplet), coupling constants.  $J$ , are reported in hertz.

Cyclic voltammetry redox potential were obtained by cyclic voltammetry method on a RST 5000 electrochemical analyzer, with glassy carbon discs as working electrode, Pt wire as the counter electrode, and SCE electrode as the reference electrode. Measurement conditions: solvent,  $\text{CH}_2\text{Cl}_2$ ; concentration,  $1 \times 10^{-4}\text{ mol L}^{-1}$ ; supporting electrolyte, ( $n\text{-Bu}$ ) $_4\text{NPF}_6$  (0.1 M); scan speed,  $0.05\text{ V s}^{-1}$ ; temperature,  $20\text{ }^\circ\text{C}$ .

The UV-Vis absorption spectra were measured on a UV-2006 UV-Specterophotometer. Fluorescence excitation and emission were recorded on a RF-5301(pc)s Spectrofluorophotometer. Fluorescence lifetime and steady state were measured on a FLS920 Spectrofluorophotometer.

The single-crystal X-ray diffraction was carried out on a SuperNova (Agilent) diffractometer. The crystal structure was solved by a direct method *SIR2004*<sup>[S3]</sup> and refined by full-matrix least-square method on  $F^2$  by means of *SHELXL-97*.<sup>[S4]</sup> The calculated positions of the hydrogen atoms were included in the final refinement.

All the calculations were performed with Gaussian 16 software package.<sup>[S5]</sup> Geometry optimizations were carried out using B3LYP<sup>[S6]</sup>/IEFPCM( $\text{CH}_2\text{Cl}_2$ )<sup>[S7]</sup> method. The UV-Vis absorption spectra were calculated at TD- $\omega$ B97XD /IEFPCM( $\text{CH}_2\text{Cl}_2$ ) (nstates = 40, root = 1) level of theory using optimized structures. The optimized structures and molecular orbitals were displayed using Chemcraft.<sup>[S8]</sup> The calculated UV-Vis absorption spectra were displayed using Multiwfn software<sup>[S9]</sup>.

## 2. Synthesis

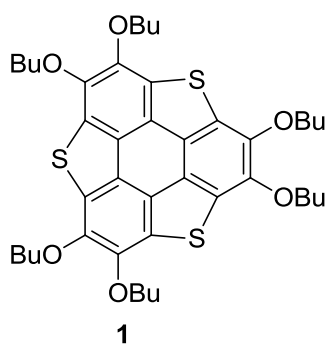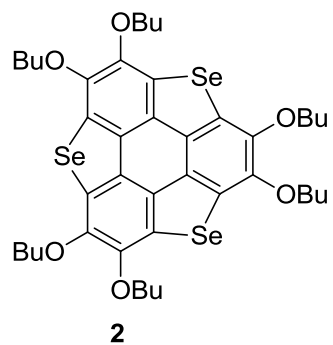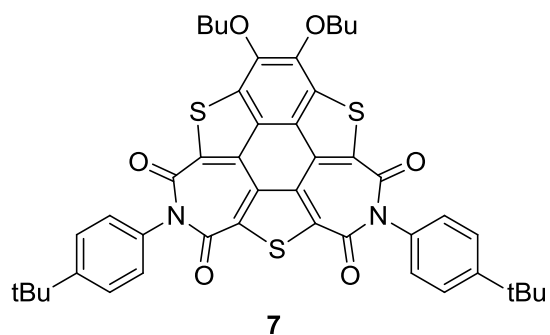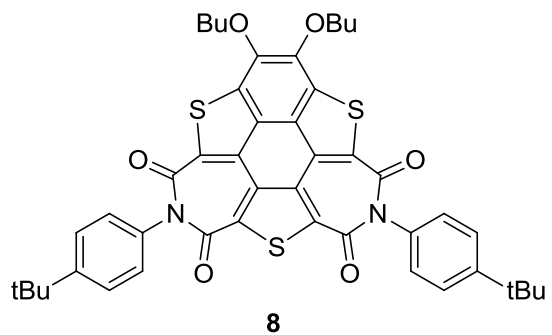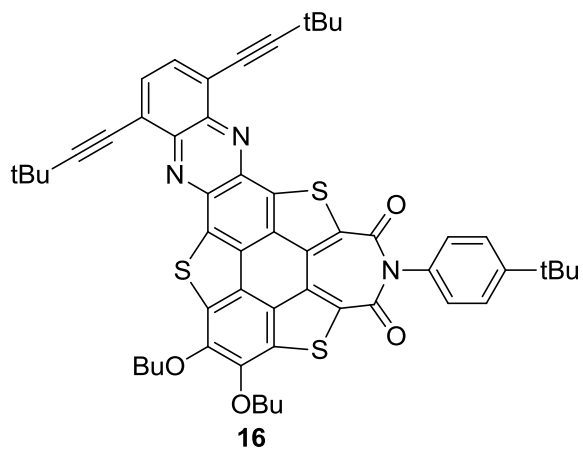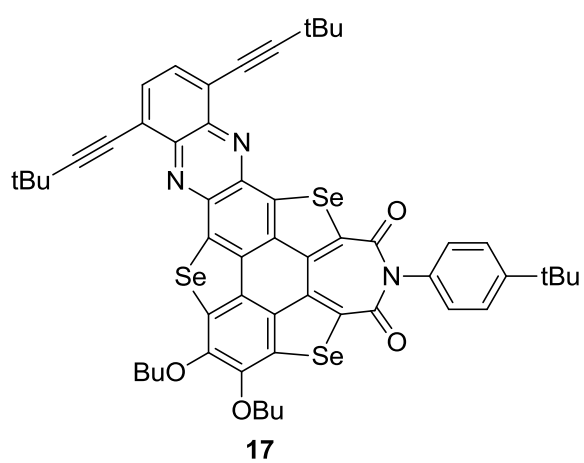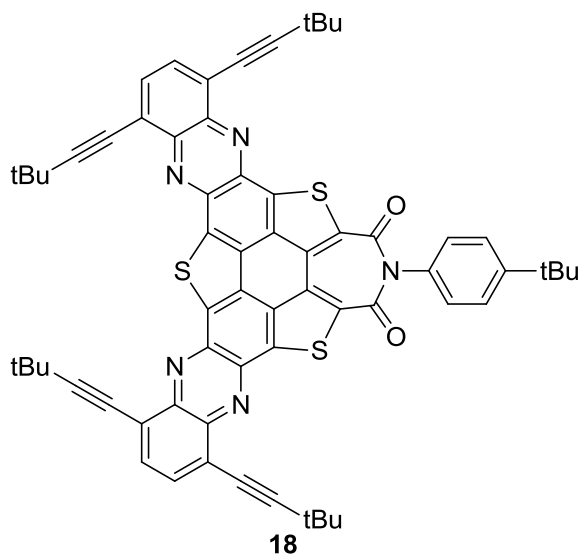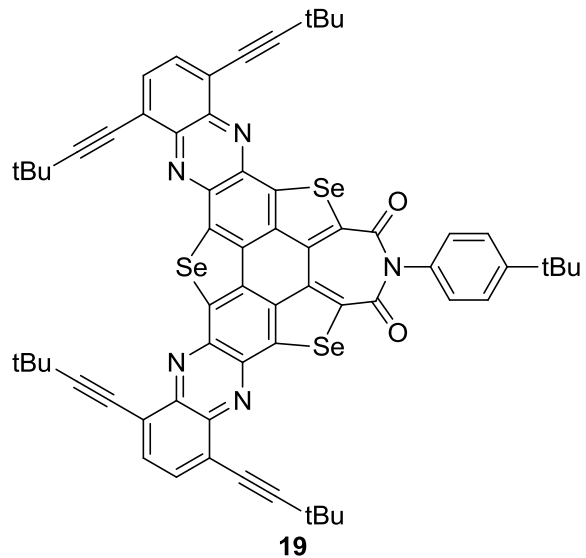

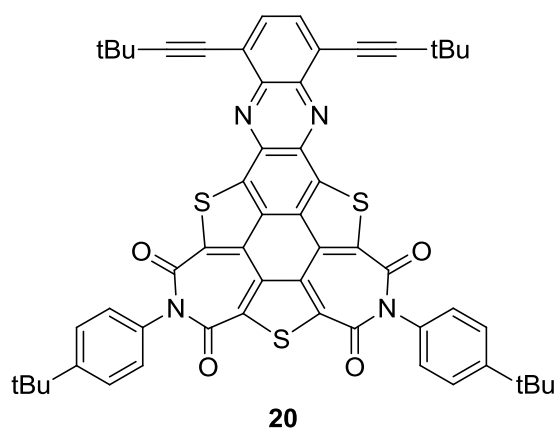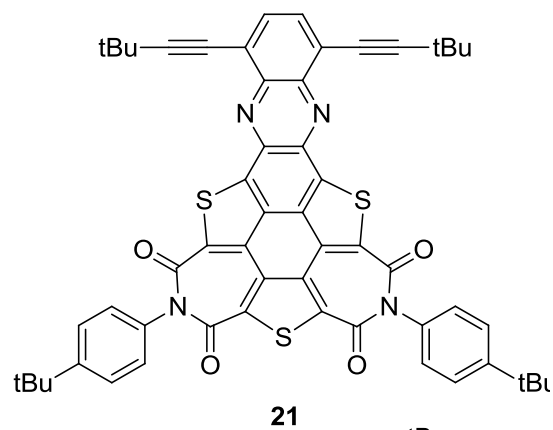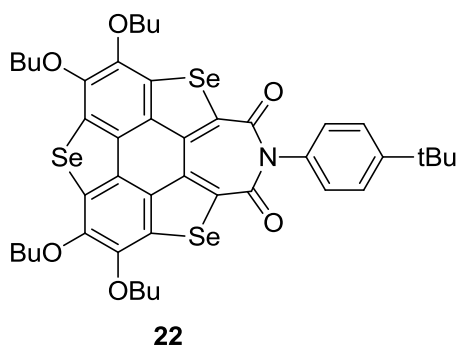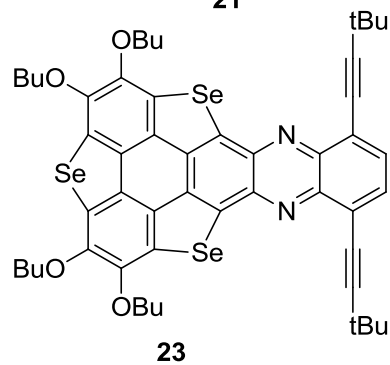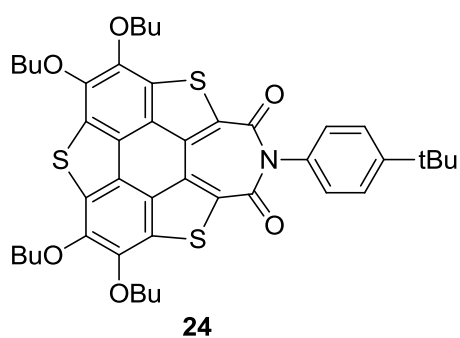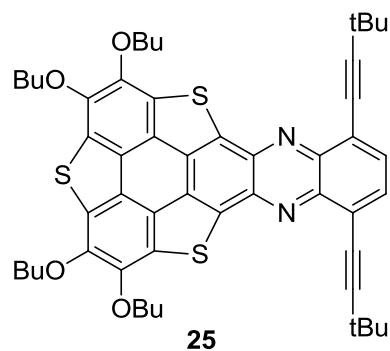

### Experimental details:

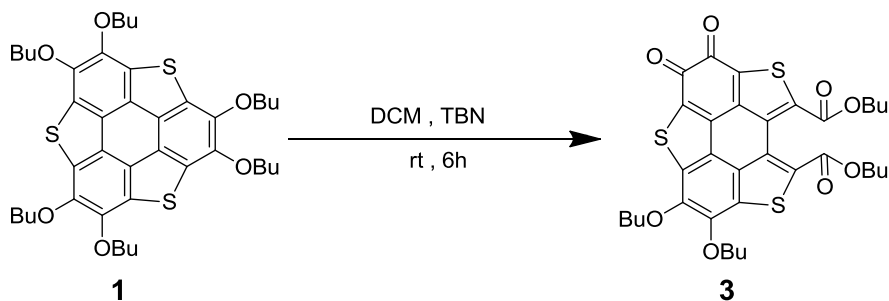

**3:** Compound **1** (75 mg, 0.1 mmol) was dissolved in  $\text{CH}_2\text{Cl}_2$  (10 mL), then *tert*-butyl nitrite (TBN, 128  $\mu\text{L}$ , 1.0 mmol) was added. The resulting mixture was stirred at room temperature (RT) for 6 h. The solvent was removed by evaporation under reduced pressure. The crude product was further purified by column chromatography on silica-gel ( $\text{CH}_2\text{Cl}_2$ ) to afford **4** as black powder (37 mg, yield,



55%). mp: 192.4-193.1 °C; <sup>1</sup>H NMR (400 MHz, CDCl<sub>3</sub>) δ 4.46-4.36 (m, *J* = 6.4 Hz, 8H), 1.90-1.75(m, 8H), 1.65-1.54(m, 4H), 1.54-1.46(m, 4H), 1.05-0.98(m, 8H); <sup>13</sup>C NMR (100 MHz, CDCl<sub>3</sub>) δ 175.0, 171.7, 162.5, 161.9, 148.8, 146.5, 142.8, 141.5, 136.0, 134.5, 134.5, 132.4, 130.8, 129.7, 128.3, 127.3, 125.3, 124.7, 73.9, 73.0, 66.5, 66.2, 12.4, 32.2, 30.6, 30.5, 19.2, 19.2, 13.9, 13.9, 13.8, 13.8; HRMS(C<sub>34</sub>H<sub>36</sub>O<sub>8</sub>S<sub>3</sub>+H): calculated for: 669.1645, found: 669.1663.

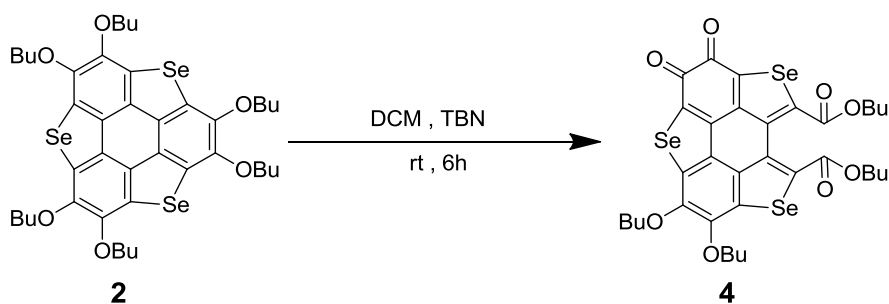

**4:** Compound **2** (89 mg, 0.1 mmol) was dissolved in CH<sub>2</sub>Cl<sub>2</sub> (10 mL), then TBN (128 μL, 1.0mmol) was added. The resulting mixture was stirred at RT for 6 h. The solvent was removed by evaporation under reduced pressure. The crude product was further purified by column chromatography on silica-gel (CH<sub>2</sub>Cl<sub>2</sub>) to afford **5** as black powder (53 mg, yield, 65%). mp: 148.5-149.3 °C; <sup>1</sup>H NMR (400 MHz, CDCl<sub>3</sub>) δ 4.41 (t, *J* = 6.5 Hz, 2H), 4.35-4.31 (m, 6H), 1.89-1.75(m, 8H), 1.64-1.44 (m, 8H), 1.05-0.98 (m, 12H); <sup>13</sup>C NMR (100MHz, CDCl<sub>3</sub>) δ 176.2, 173.9, 164.3, 163.6, 150.7, 150.5, 148.1, 145.2, 140.4, 139.6, 138.9, 138.0, 135.2, 133.2, 132.3, 130.9, 129.6, 129.3, 73.9, 73.3, 66.3, 66.0, 32.5, 32.3, 30.6, 30.5, 19.3, 19.2, 19.2, 13.9, 13.8, 13.7; HRMS(C<sub>34</sub>H<sub>36</sub>O<sub>8</sub>Se<sub>3</sub>+H): calculated for: 810.9986, found: 811.0021.

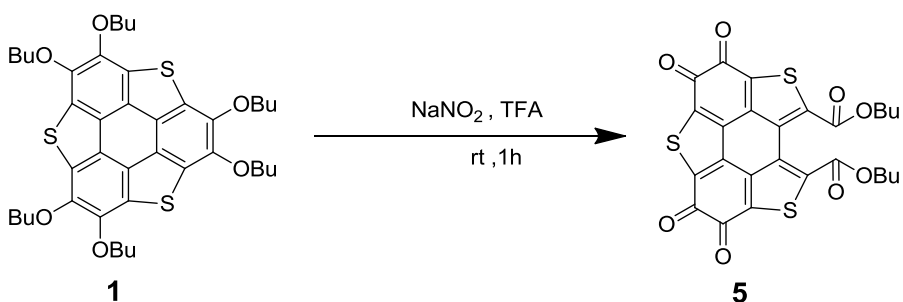

**5:** Compound **1** (75 mg, 0.1 mmol) and NaNO<sub>2</sub> (69 mg, 1.0mmol) were dissolved in TFA (10 mL) in a 20 mL bottle with the lid screwed immediately. The reaction mixture was stirred for 10 minute at room temperature, then the lid was unscrewed to introduce air for 5 seconds. Repeating the same operation for 6 times. Finally, the reaction was quenched by adding distilled water and the mixture was extracted with CH<sub>2</sub>Cl<sub>2</sub> (3 × 20 mL). The organic layers were combined and dried over anhydrous Na<sub>2</sub>SO<sub>4</sub>, then concentrated in vacuo. The crude product was further purified by column chromatography on silica-gel (CH<sub>2</sub>Cl<sub>2</sub>: EA, 50 : 1, v/v) to afford **6** as brownish red solid (17 mg, yield, 42%). mp: 223.1-223.8 °C; <sup>1</sup>H NMR (600MHz, CDCl<sub>3</sub>) δ 4.39(t, *J* = 6.6 Hz, 4H), 1.81(p, *J* = 6.8 Hz, 4H), 1.55-1.47(m, 4H), 1.02(t, *J* = 7.3 Hz, 4H); <sup>13</sup>C NMR (150 MHz, CDCl<sub>3</sub>) δ 172.7, 172.2, 161.5,

143.4, 139.9, 138.5, 136.1, 132.4, 127.3, 67.0, 30.4, 19.1, 13.7; HRMS (C<sub>26</sub>H<sub>18</sub>O<sub>8</sub>S<sub>3</sub>+H): calculated for: 555.0237, found: 555.0230.

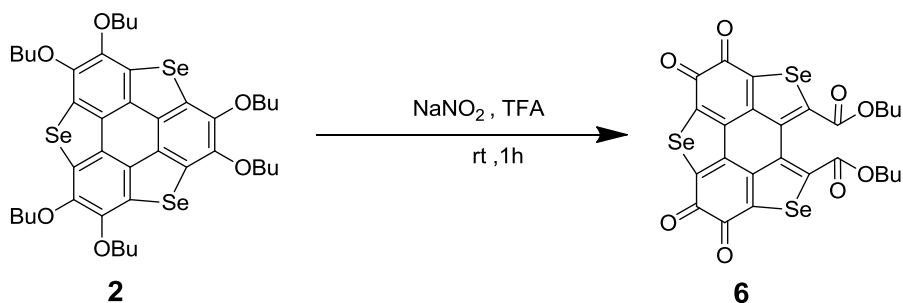

**6:** Compound **2** (89 mg, 0.1 mmol) and NaNO<sub>2</sub> (69 mg, 1.0 mmol) were dissolved in TFA (10 mL) in a 20 mL bottle with the lid screwed immediately. The reaction mixture was stirred for 10 minute at room temperature, then the lid was unscrewed to introduce air for 5 seconds. Repeating the same operation for 6 times. Finally, the reaction was quenched by adding distilled water and the mixture was extracted with CH<sub>2</sub>Cl<sub>2</sub> (3 × 20 mL). The organic layers were combined and dried over anhydrous Na<sub>2</sub>SO<sub>4</sub>, then concentrated in vacuo. The crude product was further purified by column chromatography on silica-gel (CH<sub>2</sub>Cl<sub>2</sub>: EA, 50 : 1, v/v) to afford **7** as brownish red solid (25 mg, yield, 46%). mp: 239.1-239.7 °C; <sup>1</sup>H NMR (400 MHz, CDCl<sub>3</sub>) δ 4.35(t, *J* = 6.7 Hz, 4H), 1.82-1.75(m, 4H), 1.53-1.44(m, 4H), 1.01(t, *J* = 7.4 Hz, 4H); <sup>13</sup>C NMR (100 MHz, CDCl<sub>3</sub>) δ 173.8, 173.6, 163.2, 150.8, 145.4, 143.0, 139.6, 138.7, 130.6, 66.8, 30.4, 19.2, 13.7; HRMS(C<sub>26</sub>H<sub>18</sub>O<sub>8</sub>Se<sub>3</sub>+H): calculated for: 696.8578, found: 696.8571.

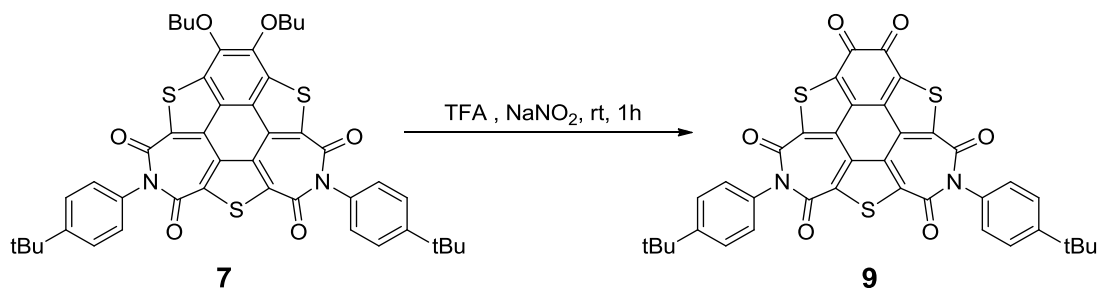

**9:** Compound **2** (82 mg, 0.1 mmol) and NaNO<sub>2</sub> (69 mg, 1.0 mmol) were dissolved in TFA (10 mL) in a 20 mL bottle with the lid screwed immediately. The reaction mixture was stirred for 10 minute at room temperature, then the lid was unscrewed to introduce air for 5 seconds. Repeating the same operation for 6 times. Finally, the reaction was quenched by adding distilled water and the mixture was extracted with CH<sub>2</sub>Cl<sub>2</sub> (3 × 20 mL). The organic layers were combined and dried over anhydrous Na<sub>2</sub>SO<sub>4</sub>, then concentrated in vacuo. The crude product was further purified by column chromatography on silica-gel (CH<sub>2</sub>Cl<sub>2</sub>) to afford **9** as red solid (63 mg, yield, 90%). mp: >300°C; <sup>1</sup>H NMR (400 MHz, Chloroform-*d*) δ 7.60 (d, *J* = 8.1 Hz, 4H), 7.21 (d, *J* = 8.0 Hz, 4H), 1.39 (s, 18H). Due to poor solubility, the crude product has not <sup>13</sup>C NMR.

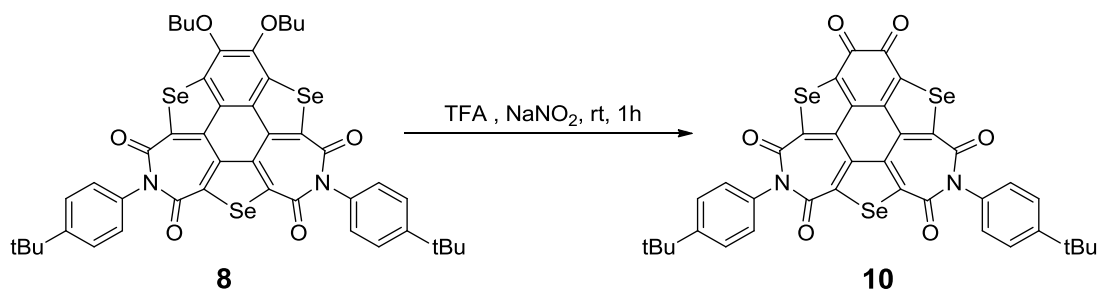

**10:** Compound **2** (96 mg, 0.1 mmol) and NaNO<sub>2</sub> (69 mg, 1.0 mmol) were dissolved in TFA (10 mL) in a 20 mL bottle with the lid screwed immediately. The reaction mixture was stirred for 10 minute at room temperature, then the lid was unscrewed to introduce air for 5 seconds. Repeating the same operation for 6 times. Finally, the reaction was quenched by adding distilled water and the mixture was extracted with CH<sub>2</sub>Cl<sub>2</sub> (3 × 20 mL). The organic layers were combined and dried over anhydrous Na<sub>2</sub>SO<sub>4</sub>, then concentrated in vacuo. The crude product was further purified by column chromatography on silica-gel (CH<sub>2</sub>Cl<sub>2</sub>) to afford **9** as red solid (77 mg, yield, 91%). mp: >300°C; <sup>1</sup>H NMR (400 MHz, Chloroform-*d*) δ 7.60 (d, *J* = 7.9 Hz, 4H), 7.21 (d, *J* = 7.8 Hz, 4H), 1.39 (s, 18H). Due to poor solubility, the crude product has not <sup>13</sup>C NMR.

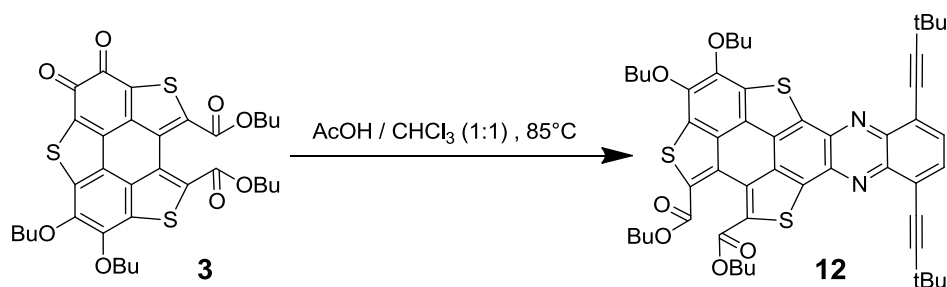

**12:** Compound **3** (334 mg, 0.5 mmol) and 3,6-bis(3,3-dimethylbut-1-yn-1-yl)benzene-1,2-diamine (**11**, 201 mg, 0.75 mmol) were dissolved in AcOH (20 mL) and CHCl<sub>3</sub> (20 mL). The resulting mixture was stirred at 85 °C for 4 h under the inert atmosphere. After cooling down to RT, the solvent was removed by evaporation under reduced pressure. The crude product was further purified by column chromatography on silica-gel (CH<sub>2</sub>Cl<sub>2</sub>: petro ether, 1 : 1, v/v) to afford **12** as red powder (361 mg, yield, 81%). mp: 215.4-216.1 °C; <sup>1</sup>H NMR (600 MHz, CDCl<sub>3</sub>): δ 7.88(q, *J* = 7.5 Hz, 2H), 4.57(t, *J* = 6.5 Hz, 2H), 4.47-4.38(m, 6H), 1.98-1.78(m, 8H), 1.72-1.61(m, 4H), 1.56-1.46(m, 22H), 1.09-1.00(m, 12H); <sup>13</sup>C NMR (150 MHz, CDCl<sub>3</sub>): δ 163.3, 163.2, 148.1, 146.1, 142.2, 142.1, 141.6, 140.6, 137.9, 137.6, 134.5, 133.0, 133.0, 132.4, 131.8, 131.1, 130.8, 130.4, 129.5, 128.4, 127.9, 126.2, 123.7, 123.5, 107.8, 107.7, 76.1, 76.0, 73.8, 72.9, 65.8, 65.7, 32.4, 32.2, 31.1, 31.0, 30.7, 30.6, 28.7, 19.3, 19.2, 19.2, 13.9, 13.8; HRMS (C<sub>52</sub>H<sub>56</sub>N<sub>2</sub>O<sub>6</sub>S<sub>3</sub>+H): calculated for: 901.3373, found: 901.3395.

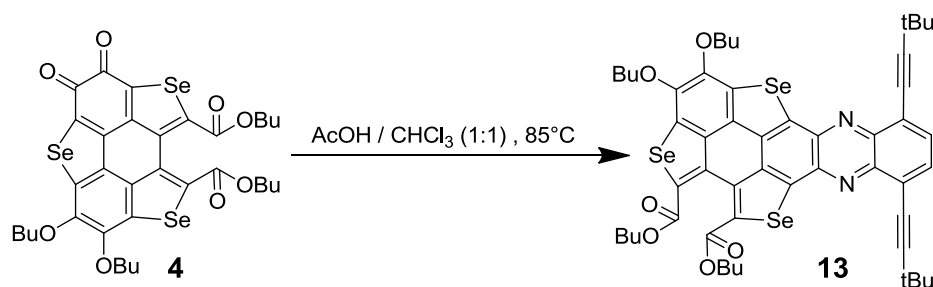

**13:** Compound **4** (405 mg, 0.5 mmol) and **11** (201 mg, 0.75 mmol) were dissolved in AcOH (20 mL) and CHCl<sub>3</sub> (20 mL). The resulting mixture was stirred at 85 °C for 4 h under the inert atmosphere. After cooling down to RT, the solvent was removed by evaporation under reduced pressure. The crude product was further purified by column chromatography on silica-gel (CH<sub>2</sub>Cl<sub>2</sub>: petro ether, 1 : 1, v/v) to afford **13** as red powder (442 mg, yield, 85%). mp: 198.3-199.5 °C; <sup>1</sup>H NMR (400 MHz, CDCl<sub>3</sub>) δ 7.91-7.85 (m, 2H), 4.47(t, *J*=6.5 Hz, 2H), 4.41-4.34(m, 6H), 1.95-1.77(m, 4H), 1.70-1.60(m, 2H), 1.57(d, *J*=1.3 Hz 18H), 1.54-1.45(m, 4H), 1.08-0.98(m, 12H); <sup>13</sup>C NMR (150 MHz, CDCl<sub>3</sub>) δ 164.9, 164.8, 149.1, 148.0, 143.3, 142.7, 142., 6142.5, 141.5, 140.8, 139.6, 137.1, 135.7, 135.3, 133.4, 132.9, 132.6, 132.4, 132.3, 132.0, 131.3, 130.7, 123.6, 123.5, 107.6, 107.6, 76.0, 73.7, 73.1, 65.8, 65.6, 32.5, 32.3, 31.1, 30.6, 30.6, 28.7, 19.4, 19.3, 19.3, 13.9, 13.9, 13.8; HRMS(C<sub>52</sub>H<sub>56</sub>N<sub>2</sub>O<sub>6</sub>Se<sub>3</sub>+H): calculated for: 1043.1715; found: 1043.1738.

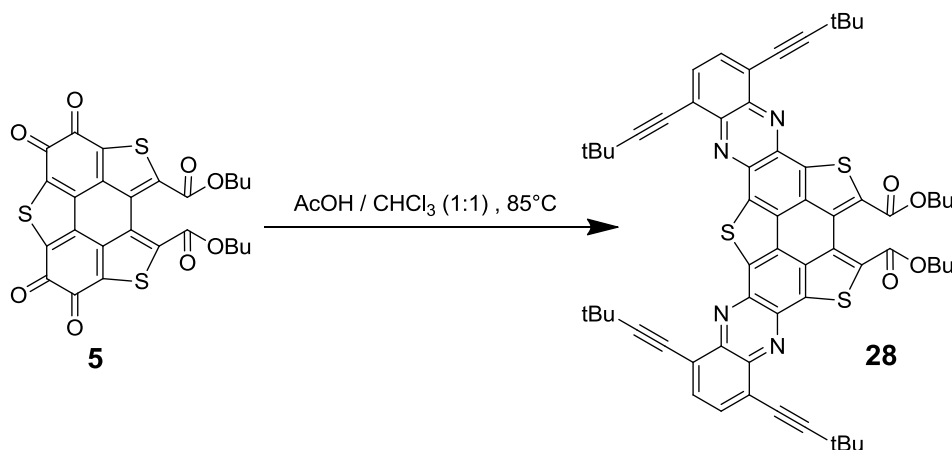

**28:** Compound **5** (277 mg, 0.5 mmol) and **11** (295 mg, 1.1 mmol) were dissolved in AcOH (20 mL) and CHCl<sub>3</sub> (20 mL). The resulting mixture was stirred at 85 °C for 4 h under the inert atmosphere. After cooling down to RT, the solvent was removed by evaporation under reduced pressure. The crude product was further purified by column chromatography on silica-gel (CH<sub>2</sub>Cl<sub>2</sub>: petro ether, 1 : 1, v/v) to afford **28** as yellow powder (382 mg, yield, 75%). mp: >300 °C; <sup>1</sup>H NMR (400 MHz, CDCl<sub>3</sub>) δ 7.94(s, 4H), 4.49(t, *J*=6.6 Hz, 4H), 1.85(dq, *J*=8.4, 6.6 Hz 4H), 1.60(d, *J*=1.9 Hz, 36H), 1.60-1.54(m, 4H), 1.04(t, *J*=7.4 Hz, 6H); <sup>13</sup>C NMR (150 MHz, CDCl<sub>3</sub>) δ 163.1, 142.5, 142.2, 141.7, 141.1, 137.9, 137.3, 135.4, 134.7, 133.1, 133.0, 131.1, 128.1, 123.8, 123.7, 108.1, 108.0, 75.9, 75.9, 66.0, 31.2, 31.1, 31.1, 30.6, 28.8, 19.3, 13.8; HRMS (C<sub>64</sub>H<sub>58</sub>N<sub>4</sub>O<sub>4</sub>Se+H): calculated for: 1091.3697; found: 1091.9710.

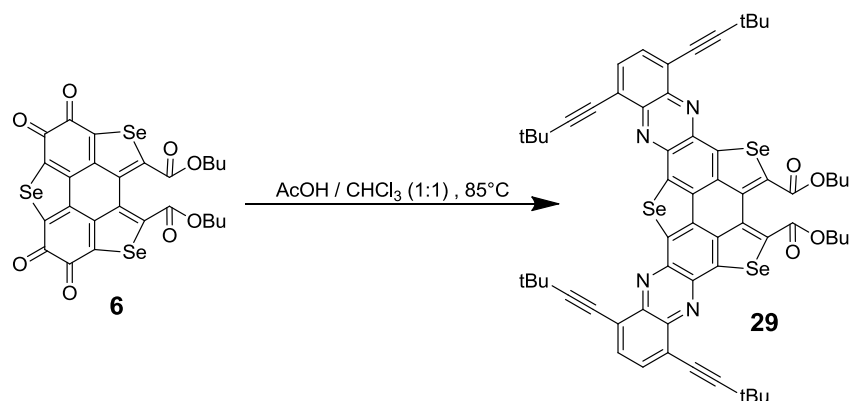

**29:** Compound **6** (348 mg, 0.5 mmol) and **11** (295 mg, 1.1 mmol) were dissolved in glacial acetic acid (20 mL) and TCM (20 mL). The resulting mixture was stirred at 85 °C for 4 h under the inert atmosphere. After cooling down to RT, the solvent was removed by evaporation under reduced pressure. The crude product was further purified by column chromatography on silica-gel (CH<sub>2</sub>Cl<sub>2</sub>: petro ether, 1 : 1, v/v) to afford **29** as yellow powder (458 mg, yield, 79%). mp: >300 °C; <sup>1</sup>H NMR (600 MHz, CDCl<sub>3</sub>) δ 7.89 (s, 4H), 4.44 (t, *J* = 6.7 Hz, 4H), 1.85 (p, *J* = 6.7 Hz, 4H), 1.60 (d, *J* = 1.7 Hz, 40H), 1.04 (t, *J* = 7.4 Hz, 6H); <sup>13</sup>C NMR (150 MHz, CDCl<sub>3</sub>) δ 164.7, 143.2, 142.7, 142.5, 142.5, 141.9, 140.6, 139.6, 138.9, 135.1, 132.9, 132.9, 131.9, 123.7, 123.7, 107.8, 76.0, 65.9, 31.1, 31.1, 30.6, 28.7, 19.3, 13.8; HRMS (C<sub>64</sub>H<sub>58</sub>N<sub>4</sub>O<sub>4</sub>Se<sub>3</sub>+H): calculated for: 1161.2075; found: 1161.2089.

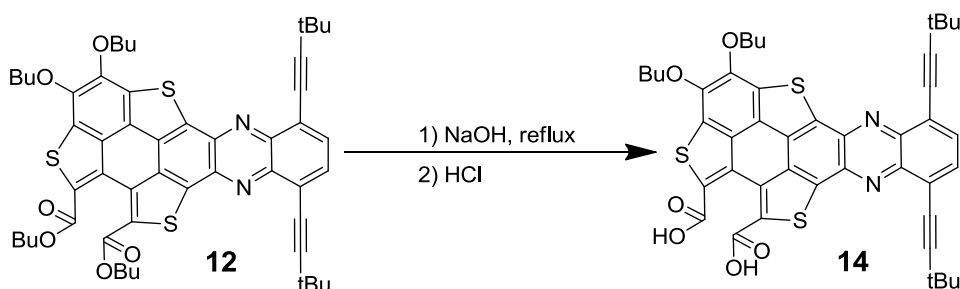

**14:** Compound **12** (450 mg, 0.5 mmol) and NaOH (400 mg, 10 mmol) were dissolved in the mixed solvent of THF (20 mL)-EtOH (20 mL)-H<sub>2</sub>O (2 mL), then stirred at 85 °C for 12 h. After cooling down to RT, the reaction was quenched by adding HCl aqueous (3 N) and extracted with CH<sub>2</sub>Cl<sub>2</sub> (3 × 50 mL). The organic layers were combined and dried over anhydrous Na<sub>2</sub>SO<sub>4</sub>, and then concentrated under reduced pressure. The crude product was purified by column chromatography on silica-gel (CH<sub>2</sub>Cl<sub>2</sub>: MeOH, 3 : 1, v/v) to afford **14** as red powder (245 mg, yield, 62%). mp: >300 °C; <sup>1</sup>H NMR (400 MHz, THF-*d*<sub>8</sub>) δ 7.85 (q, *J* = 7.5 Hz, 2H), 4.56 (t, *J* = 6.4 Hz, 2H), 4.41 (t, *J* = 6.3 Hz, 2H), 1.97 – 1.85 (m, 5H), 1.68 (dt, *J* = 12.4, 4.8 Hz, 4H), 1.56 (d, *J* = 2.5 Hz, 19H), 1.07 (q, *J* = 7.6 Hz, 6H). <sup>13</sup>C NMR (150 MHz, THF-*d*<sub>8</sub>) δ 164.0, 148.3, 146.7, 142.4, 142.3, 142.0, 140.9, 140.4, 138.1, 135.5, 134.3, 133.1, 132.7, 132.4, 131.5, 130.9, 130.5, 129.8, 128.5, 127.8, 126.5, 124.4, 124.3, 107.3, 107.2, 77.0, 76.9, 74.0, 73.2, 33.1, 32.8, 31.1, 31.1, 29.1, 29.0, 19.8, 19.7, 13.9, 13.9; HRMS(C<sub>44</sub>H<sub>40</sub>N<sub>2</sub>O<sub>4</sub>S<sub>3</sub>+H): calculated for: 789.2121, found: 789.2147.

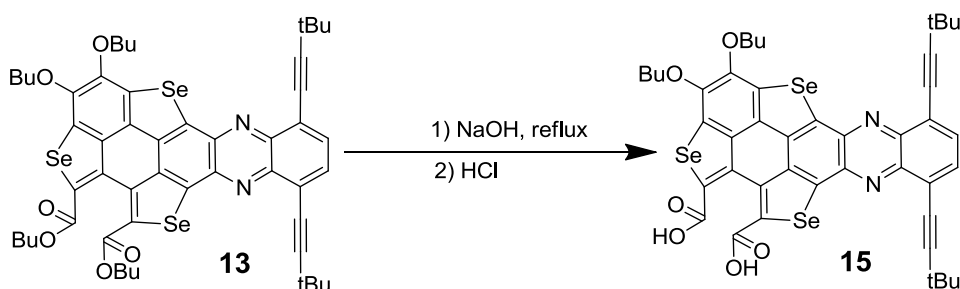

**15:** Compound **13** (520 mg 0.5 mmol) and NaOH (400 mg, 10 mmol) were dissolved in the mixed solvent of THF (20 mL)-EtOH (20 mL)-H<sub>2</sub>O (2 mL), then stirred at 85 °C for 12 h. After cooling down to RT, the reaction was quenched by adding HCl aqueous (3 N) and extracted with CH<sub>2</sub>Cl<sub>2</sub> (3 × 50 mL). The organic layers were combined and dried over anhydrous Na<sub>2</sub>SO<sub>4</sub>, and then concentrated under reduced pressure. The crude product was further purified by column chromatography on silica-gel (CH<sub>2</sub>Cl<sub>2</sub>: MeOH, 3 : 1, *v/v*) to afford **15** as red powder (279 mg, yield, 60%). mp: >300 °C; <sup>1</sup>H NMR (600 MHz, THF-*d*<sub>8</sub>) δ 7.76 (q, *J* = 7.3 Hz, 2H), 4.37 (t, *J* = 6.3 Hz, 4H), 1.91 – 1.85 (m, 4H), 1.71 – 1.65 (m, 4H), 1.58 (d, *J* = 2.3 Hz, 18H), 1.08 (td, *J* = 7.4, 4.0 Hz, 6H); <sup>13</sup>C NMR (150 MHz, THF-*d*<sub>8</sub>) δ 164.8, 149.5, 147.8, 143.1, 142.9, 142.5, 141.6, 141.3, 140.7, 137.8, 137.2, 136.2, 135.9, 135.3, 132.9, 132.5, 132.32, 131.3, 130.8, 130.8, 129.6, 124.4, 124.1, 107.0, 106.9, 77.1, 77.1, 73.6, 73.1, 33.2, 33.0, 31.3, 31.2, 29.1, 19.9, 19.9, 14.0, 13.9; HRMS(C<sub>44</sub>H<sub>40</sub>N<sub>2</sub>O<sub>4</sub>Se<sub>3</sub>+H): calculated for: 931.0440, found: 931.0463.

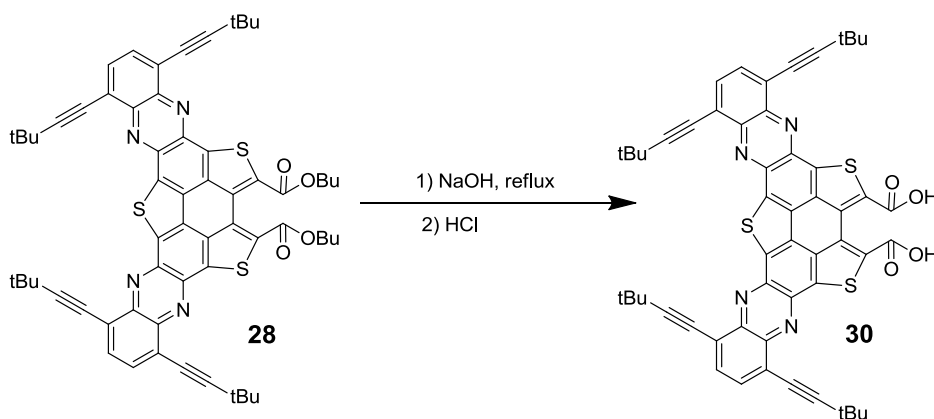

**30:** Compound **28** (501 mg 0.5 mmol) and NaOH (400 mg, 10 mmol) were dissolved in the mixed solvent of THF (20 mL)-EtOH (20 mL)-H<sub>2</sub>O (2 mL), then stirred at 85 °C for 12 h. After cooling down to RT, the reaction was quenched by adding HCl aqueous (3 N) and extracted with CH<sub>2</sub>Cl<sub>2</sub> (3 × 50 mL). The organic layers were combined and dried over anhydrous Na<sub>2</sub>SO<sub>4</sub>, and then concentrated under reduced pressure. Due to poor solubility, the crude product was not further purified.

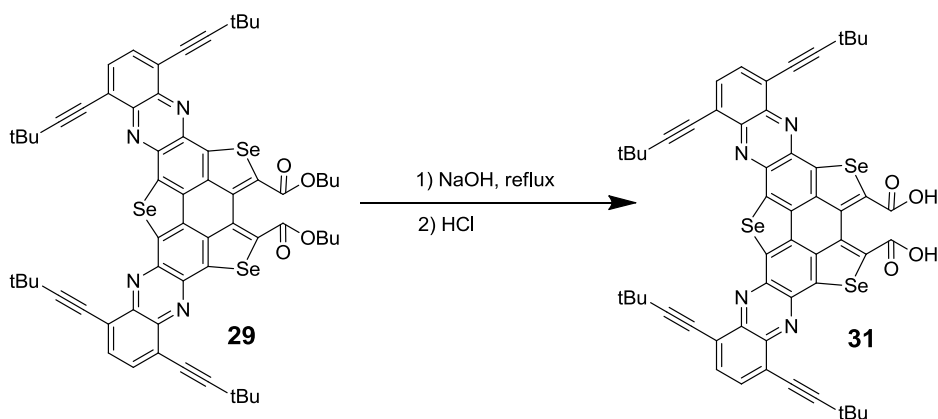

**31:** Compound **29** (558 mg, 0.5 mmol) and NaOH (400 mg, 10 mmol) were dissolved in the mixed solvent of THF (20 mL)-EtOH (20 mL)-H<sub>2</sub>O (2 mL), then stirred at 85 °C for 12 h. After cooling down to RT, the reaction was quenched by adding HCl aqueous (3 N) and extracted with CH<sub>2</sub>Cl<sub>2</sub> (3 × 50 mL). The organic layers were combined and dried over anhydrous Na<sub>2</sub>SO<sub>4</sub>, and then concentrated under reduced pressure. Due to poor solubility, the crude product was not further purified.

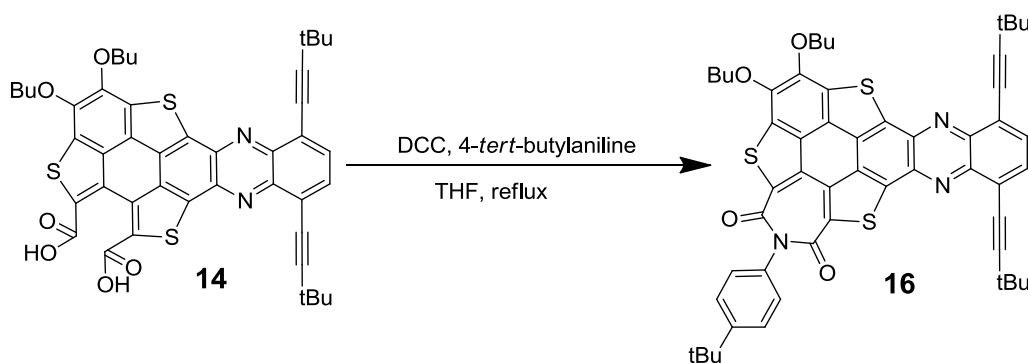

**16:** Compound **14** (160 mg, 0.2 mmol), 4-*tert*-butylaniline (40 μL, 0.25 mmol) and 1,3-dicyclohexylcarbodiimide (DCC, 412 mg, 2 mmol) were dissolved in anhydrous THF (50 mL). The resulting mixture was stirred at 80 °C for 8 h under nitrogen. After cooling down to RT, the reaction was quenched by adding distilled water and extracted with CH<sub>2</sub>Cl<sub>2</sub> (3 × 15 mL). The organic layers were combined and dried over anhydrous Na<sub>2</sub>SO<sub>4</sub>, then concentrated under reduced pressure. The crude product was purified by column chromatography on silica-gel (eluent, CH<sub>2</sub>Cl<sub>2</sub>: petro ether, 1 : 1, v/v) to afford **16** as red powder (36 mg, yield, 20 %). mp: >300 °C; <sup>1</sup>H NMR (400 MHz, CDCl<sub>3</sub>) δ 7.90 (d, *J* = 7.4 Hz, 1H), 7.80 (d, *J* = 7.4 Hz, 1H), 7.60 (d, *J* = 8.1 Hz, 2H), 7.32 (d, *J* = 8.1 Hz, 2H), 4.59 (t, *J* = 6.5 Hz, 2H), 4.35 (t, *J* = 6.4 Hz, 2H), 1.89 (dt, *J* = 29.1, 7.4 Hz, 4H), 1.57 (d, *J* = 18.1 Hz, 22H), 1.43 (s, 9H), 1.05 (dt, *J* = 14.9, 7.3 Hz, 6H). <sup>13</sup>C NMR (150 MHz, CDCl<sub>3</sub>) δ 161.8, 161.7, 150.8, 150.1, 146.28, 142.6, 141.6, 141.3, 140.3, 139.9, 138.5, 137.6, 135.3, 133.7, 133.6, 133.3, 132.5, 131.6, 130.2, 129.5, 127.6, 127.4, 127.3, 126.5, 125.9, 123.9, 123.6, 108.6, 1078.0, 34.7, 32.3, 32.1, 31.5, 31.1, 31.0, 29.7, 28.7, 19.2, 19.2, 13.9, 13.9; HRMS(C<sub>54</sub>H<sub>51</sub>N<sub>3</sub>O<sub>4</sub>S<sub>3</sub>+H): calculated for: 902.3114, found: 902.3101.

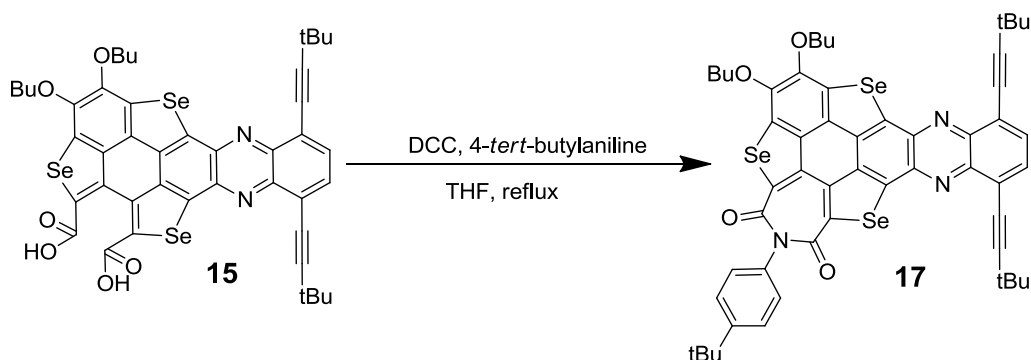

**17:** Compound **15** (190 mg, 0.2 mmol), 4-*tert*-butylaniline (40  $\mu$ L, 0.25 mmol) and DCC (412 mg, 2 mmol) were dissolved in anhydrous THF (50 mL). The resulting mixture was stirred at 80  $^{\circ}$ C for 8 h under nitrogen. After cooling down to RT, the reaction was quenched by adding distilled water and extracted with  $\text{CH}_2\text{Cl}_2$  ( $3 \times 50$  mL). The organic layers were combined and dried over anhydrous  $\text{Na}_2\text{SO}_4$ , then concentrated under reduced pressure. The crude product was further purified by column chromatography on silica-gel ( $\text{CH}_2\text{Cl}_2$ : petro ether, 1 : 1, v/v) to afford **17** as red powder (53 mg, yield, 25%). mp:  $>300$   $^{\circ}$ C;  $^1\text{H}$  NMR (400 MHz,  $\text{CDCl}_3$ )  $\delta$  7.79 (d,  $J = 7.3$  Hz, 1H), 7.63 (d,  $J = 7.4$  Hz, 1H), 7.57 (d,  $J = 8.2$  Hz, 2H), 7.35 (d,  $J = 8.1$  Hz, 2H), 4.37 (t,  $J = 6.4$  Hz, 2H), 4.15 (t,  $J = 6.3$  Hz, 2H), 1.88 – 1.75 (m, 4H), 1.58 (d,  $J = 15.8$  Hz, 22H), 1.45 (s, 9H), 1.03 (dt,  $J = 10.4, 7.3$  Hz, 6H).  $^{13}\text{C}$  NMR (150 MHz,  $\text{CDCl}_3$ )  $\delta$  162.5, 162.5, 150.9, 150.7, 147.8, 145.7, 142.8, 142.4, 142.1, 141.5, 141.0, 140.1, 137.4, 136.5, 135.0, 133.6, 133.2, 132.9, 132.2, 131.1, 130.8, 130.7, 130.1, 129.3, 127.5, 126.3, 123.6, 123.5, 108.2, 107.7, 76.3, 75.7, 73.0, 72.1, 34.7, 32.4, 31.5, 31.1, 28.7, 19.3, 13.9. HRMS( $\text{C}_{54}\text{H}_{51}\text{N}_3\text{O}_4\text{Se}_3+\text{H}$ ): calculated for: 1044.1456, found: 1044.1461.

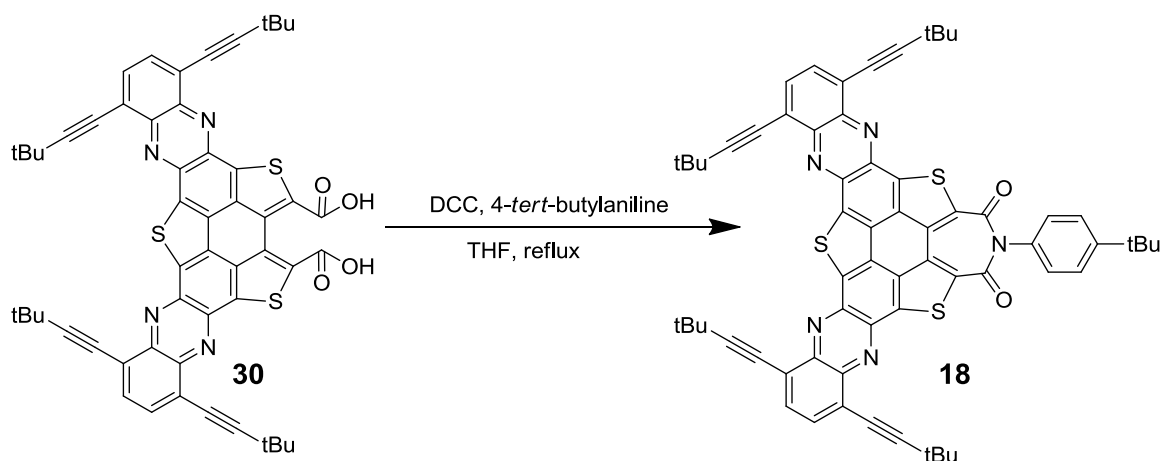

**18:** Compound **30** (182 mg, 0.2 mmol), 4-*tert*-butylaniline (40  $\mu$ L, 0.25 mmol) and DCC (412 mg, 2 mmol) were dissolved in anhydrous THF (50 mL). The resulting mixture was stirred at 80  $^{\circ}$ C for 8 h under nitrogen. After cooling down to RT, the reaction was quenched by adding distilled water and extracted with  $\text{CH}_2\text{Cl}_2$  ( $3 \times 50$  mL). The organic layers were combined and dried over anhydrous  $\text{Na}_2\text{SO}_4$ , then concentrated under reduced pressure. The crude product was further purified by column chromatography on silica-gel ( $\text{CH}_2\text{Cl}_2$ : petro ether, 2 : 1, v/v) to afford **18** as red powder (37 mg, yield, 18%). mp:  $>300$   $^{\circ}$ C;  $^1\text{H}$  NMR (400 MHz,  $\text{CDCl}_3$ )  $\delta$  7.87 (s, 4H), 7.62 (d,  $J = 8.5$  Hz, 2H), 7.36 (d,  $J = 8.3$  Hz, 2H), 1.55 (s, 18H), 1.43 (s, 9H).  $^{13}\text{C}$  NMR (150 MHz,  $\text{CDCl}_3$ )  $\delta$  161.9, 151.1, 143.1,



142.4, 141.4, 140.8, 139.9, 139.0, 137.7, 134.1, 133.50, 133.1, 130.6, 127.7, 127.5, 126.6, 124.0, 123.7, 108.9, 108.3, 75.7, 75.6, 34.8, 31.5, 31.1, 31.1, 31.0, 29.7, 28.8, 28.7.  
 HRMS(C<sub>64</sub>H<sub>53</sub>N<sub>5</sub>O<sub>5</sub>Se<sub>3</sub>+H): calculated for: 1020.3434, found: 1020.3434.

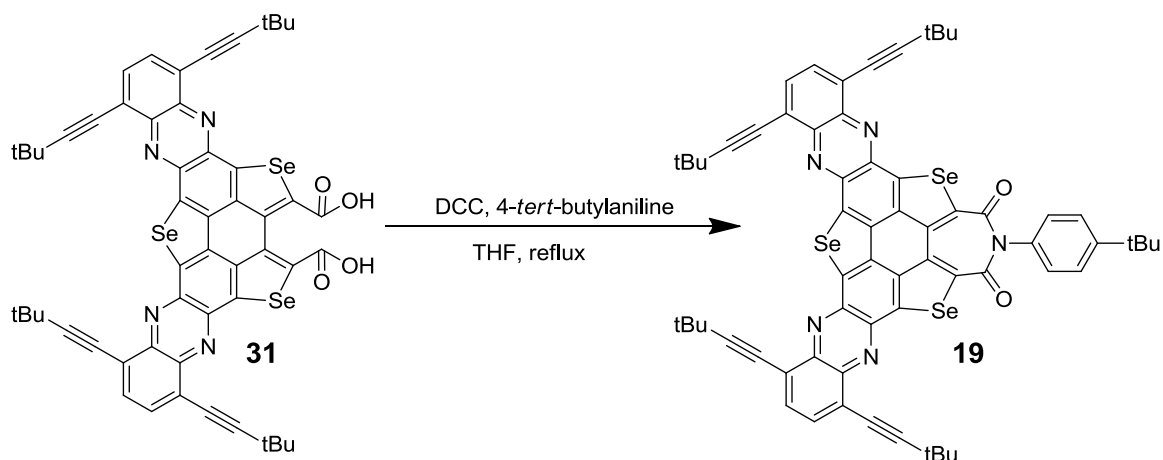

**19:** Compound **31** (210 mg, 0.2 mmol), 4-*tert*-butylaniline (40  $\mu$ L, 0.25 mmol) and DCC (412 mg, 2 mmol) were dissolved in anhydrous THF (50 mL). The resulting mixture was stirred at 80 °C for 8 h under nitrogen. After cooling down to RT, the reaction was quenched by adding distilled water and extracted with CH<sub>2</sub>Cl<sub>2</sub> (3  $\times$  50 mL). The organic layers were combined and dried over anhydrous Na<sub>2</sub>SO<sub>4</sub>, then concentrated under reduced pressure. The crude product was further purified by column chromatography on silica-gel (CH<sub>2</sub>Cl<sub>2</sub>: petro ether, 2 : 1, v/v) to afford **17** as red powder (35 mg, yield, 15%). mp: >300 °C; <sup>1</sup>H NMR (400 MHz, CDCl<sub>3</sub> with 2 drops D-TFA)  $\delta$  7.97 – 7.86 (m, 4H), 7.64 (d, *J* = 8.2 Hz, 2H), 7.38 (d, *J* = 8.1 Hz, 2H), 1.58 (d, *J* = 3.0 Hz, 36H), 1.42 (s, 9H).; Due to poor solubility, we failed to obtain <sup>13</sup>C NMR. HRMS(C<sub>64</sub>H<sub>53</sub>N<sub>5</sub>O<sub>5</sub>Se<sub>3</sub>+H): calculated for: 1162.1776, found: 1162.1801.

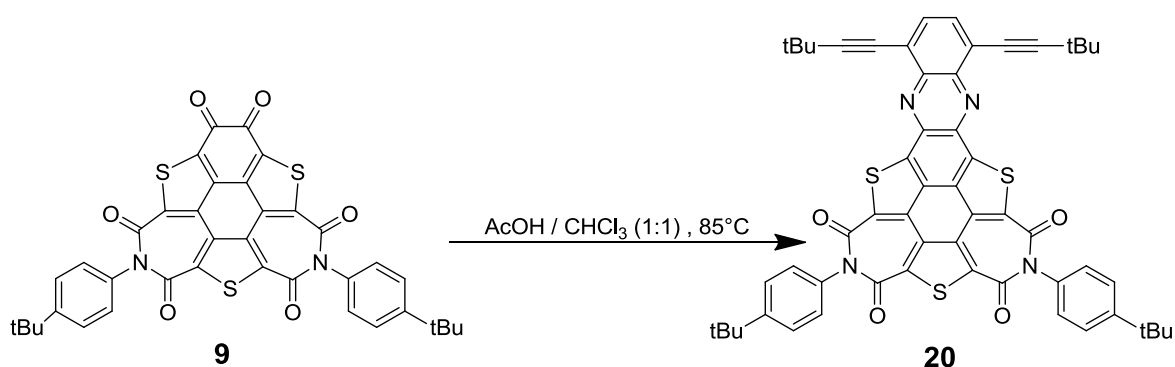

**20:** Compound **9** (70 mg, 0.1 mmol) and **11** (32mg, 0.12 mmol) were dissolved in glacial acetic acid (20 mL) and TCM (20 mL). The resulting mixture was stirred at 85 °C for 4 h under the inert atmosphere. After cooling down to RT, the solvent was removed by evaporation under reduced pressure. The crude product was further purified by column chromatography on silica-gel (CH<sub>2</sub>Cl<sub>2</sub>: petro ether, 2 : 1, v/v) to afford **20** as yellow powder (80 mg, yield, 85%). mp: >300 °C; <sup>1</sup>H NMR (600 MHz, Chloroform-*d*)  $\delta$  7.86 (s, 1H), 7.60 (d, *J* = 8.3 Hz, 2H), 7.26 (d, *J* = 7.3 Hz, 4H), 1.54 (s, 9H), 1.43 (s, 9H). <sup>13</sup>C NMR (151 MHz, CDCl<sub>3</sub>)  $\delta$  161.0, 160.7, 151.5, 141.7, 141.6, 140.9, 138.5, 138.2,

136.3, 133.8, 132.2, 129.8, 127.3, 126.7, 125.8, 124.0, 109.3, 75.3, 34.8, 31.4, 31.0, 28.8.HRMS (C<sub>56</sub>H<sub>46</sub>N<sub>4</sub>O<sub>4</sub>S<sub>3</sub>+H): calculated for: 935.2754; found: 935.2751.

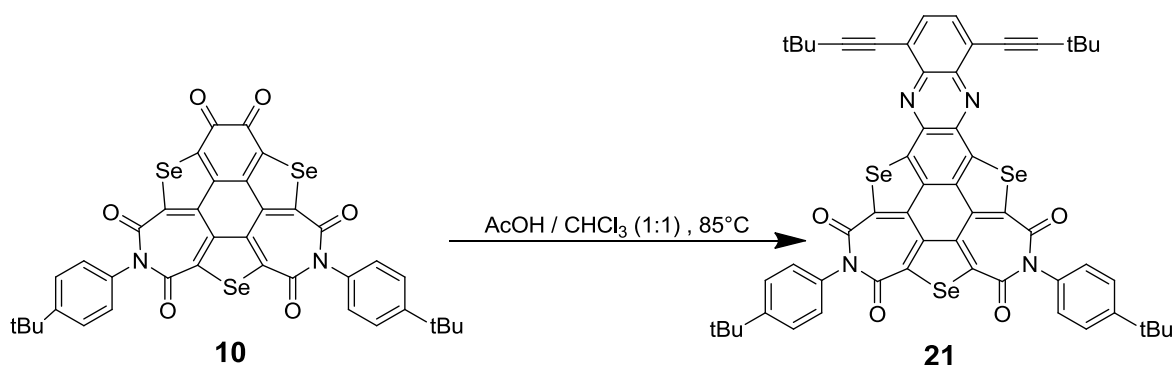

**20**: Compound **9** (85mg, 0.1 mmol) and **11** (32mg, 0.12 mmol) were dissolved in glacial acetic acid (20 mL) and TCM (20 mL). The resulting mixture was stirred at 85 °C for 4 h under the inert atmosphere. After cooling down to RT, the solvent was removed by evaporation under reduced pressure. The crude product was further purified by column chromatography on silica-gel (CH<sub>2</sub>Cl<sub>2</sub>: petro ether, 2 : 1, v/v) to afford **20** as yellow powder (90 mg, yield, 86%). mp: >300 °C; <sup>1</sup>H NMR (600 MHz, Chloroform-*d*) δ 7.75 (s, 1H), 7.57 (d, *J* = 8.5 Hz, 2H), 7.25 (s, 1H), 1.55 (s, 9H), 1.43 (s, 10H). <sup>13</sup>C NMR (151 MHz, CDCl<sub>3</sub>) δ 161.9, 161.8, 151.5, 149.5, 145.0, 143.1, 142.4, 140.8, 136.2, 136.0, 133.5, 133.3, 129.9, 127.2, 126.6, 123.8, 109.1, 75.5, 34.8, 31.4, 31.1, 31.1, 28.8.HRMS (C<sub>56</sub>H<sub>46</sub>N<sub>4</sub>O<sub>4</sub>Se<sub>3</sub>+H): calculated for:1077.1095; found: 1077.1096.

### 3. Crystal Structure Analysis

#### 3.1 Experimental details on crystal growth

The single crystals of **4** (black needle), and **6** (black needle) were obtained by slowly evaporating their CH<sub>2</sub>Cl<sub>2</sub>-MeOH (1 : 1, v/v), CH<sub>2</sub>Cl<sub>2</sub> solutions at room temperature, respectively.

Selected crystallographic data of **4** and **6**.

|                                                | <b>4</b>                                                        | <b>6</b>                                                       |
|------------------------------------------------|-----------------------------------------------------------------|----------------------------------------------------------------|
| CCDC number                                    | 2057108                                                         | 2057109                                                        |
| Empirical formula                              | C <sub>68</sub> H <sub>72</sub> O <sub>16</sub> Se <sub>6</sub> | C <sub>26</sub> H <sub>18</sub> O <sub>8</sub> Se <sub>3</sub> |
| Formula weight                                 | 1619.01                                                         | 695.31                                                         |
| Temperature [K]                                | 150.00(10)                                                      | 173.00                                                         |
| $\lambda$ [Å]                                  | 1.54184(Cu- K $\alpha$ )                                        | 0.71073(Mo-K $\alpha$ )                                        |
| Crystal size [mm <sup>3</sup> ]                | 0.07×0.04×0.02                                                  | 0.4×0.2×0.1                                                    |
| Crystal system                                 | monoclinic                                                      | triclinic                                                      |
| space group                                    | <i>P</i> 2 <sub>1</sub> / <i>c</i>                              | <i>P</i> -1                                                    |
| <i>a</i> [Å]                                   | 16.2433(4)                                                      | 8.7375(5)                                                      |
| <i>b</i> [Å]                                   | 19.4044(5)                                                      | 9.6492(7)                                                      |
| <i>c</i> [Å]                                   | 21.7744(6)                                                      | 15.5120(12)                                                    |
| $\alpha$ [°]                                   | 90                                                              | 107.499(7)                                                     |
| $\beta$ [°]                                    | 108.927(3)                                                      | 98.427(6)                                                      |
| $\gamma$ [°]                                   | 90                                                              | 99.971(5)                                                      |
| <i>V</i> [Å <sup>3</sup> ]                     | 6492.0(3)                                                       | 1200.68(16)                                                    |
| <i>Z</i>                                       | 4                                                               | 2                                                              |
| <i>d</i> <sub>calc</sub> [g cm <sup>-3</sup> ] | 1.656                                                           | 1.9231                                                         |
| $\mu$ [mm <sup>-1</sup> ]                      | 4.561                                                           | 4.647                                                          |
| 2 $\theta$ <sub>max</sub> [°]                  | 152.402                                                         | 57.26                                                          |
| Data/restraints/parameters                     | 12821/65/893                                                    | 5440/0/336                                                     |
| <i>Goof</i>                                    | 1.043                                                           | 1.021                                                          |
| <i>R</i> [ <i>I</i> > 2 $\sigma$ ( <i>I</i> )] | 0.071                                                           | 0.0540                                                         |
| <i>wR</i> <sub>2</sub>                         | 0.1801                                                          | 0.0888                                                         |

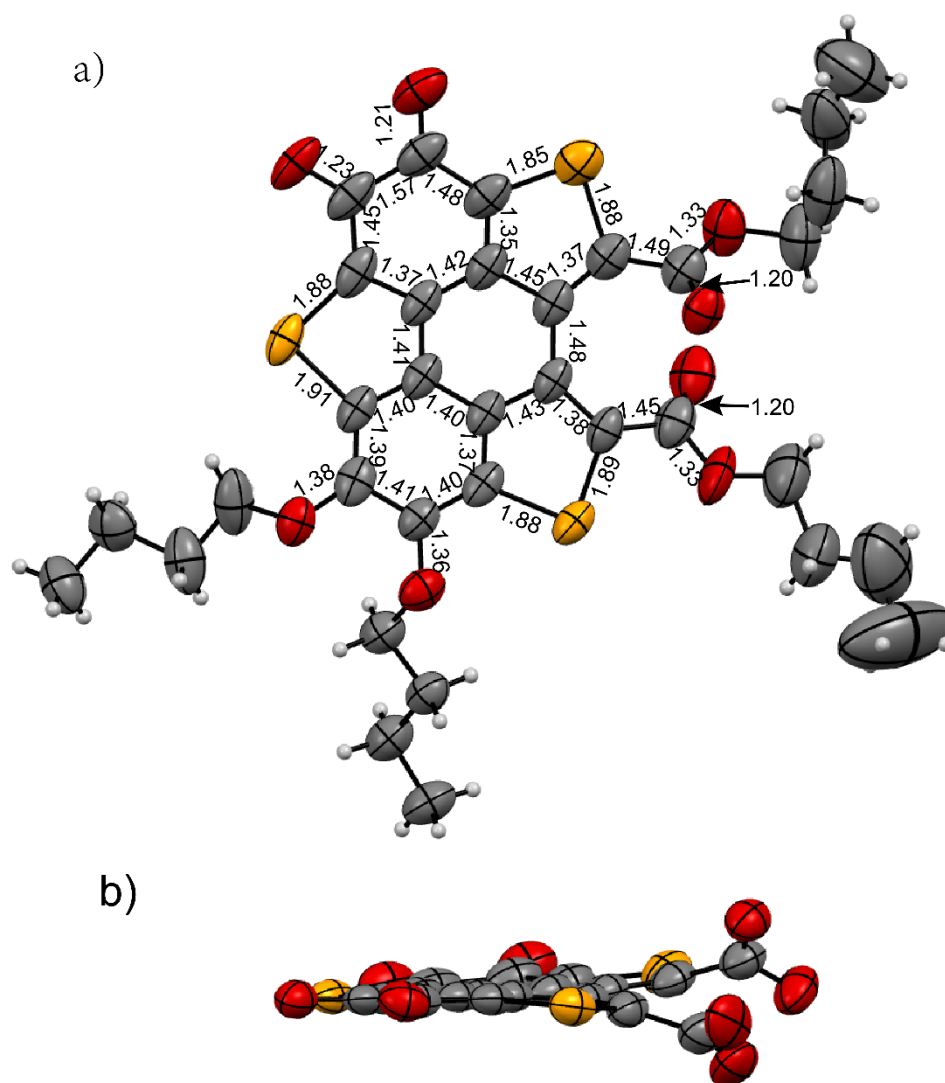

**Figure S1.** a) Top view and b) side view of compound **4**. The selected bond lengths are in unit of Å. The *n*-Bu groups and H atoms are omitted for clarity in b). The cyan, grey, red, yellow balls represent hydrogen, carbon, oxygen, and selenium atoms, respectively.

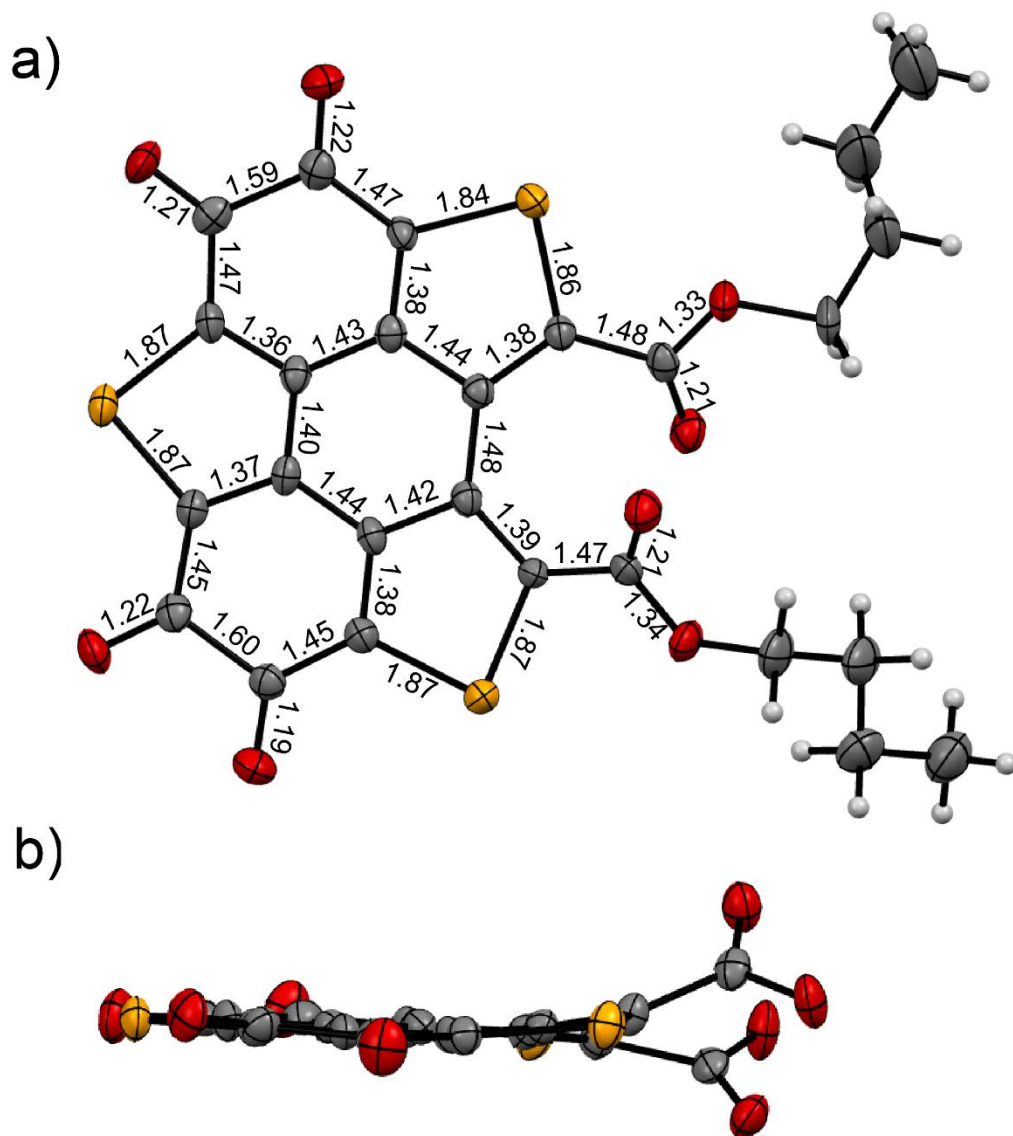

**Figure S2.** a) Top view and b) side view of compound **6**. The selected bond lengths are in unit of Å. The *n*-Bu groups and H atoms are omitted for clarity in b). The cyan, grey, red, yellow balls represent hydrogen, carbon, oxygen, and selenium atoms, respectively.

## 4. Photophysical Study

### 4.1 Spectroelectrochemistry of 3, 4, 5, 6, 9, and 10

The in-situ investigation of the absorption spectra of **3**, **4**, **5**, **6**, **9**, and **10** under constant electrochemical reduction potential was performed on a Zahner CIMPS type photo-electrochemical workstation using a standard three-electrode electrochemical cell with an transparent indium tin oxide (ITO) as the working electrode, Pt rod as the counter electrode, a SCE as the reference electrode and a tungsten halogen lamp (500 W) as light source. Measurement conditions: solvent, CH<sub>2</sub>Cl<sub>2</sub>; concentration, 1×10<sup>-4</sup> mol L<sup>-1</sup>; supporting electrolyte, (n-Bu)<sub>4</sub>NPF<sub>6</sub> (0.1 M); temperature, 20 °C.

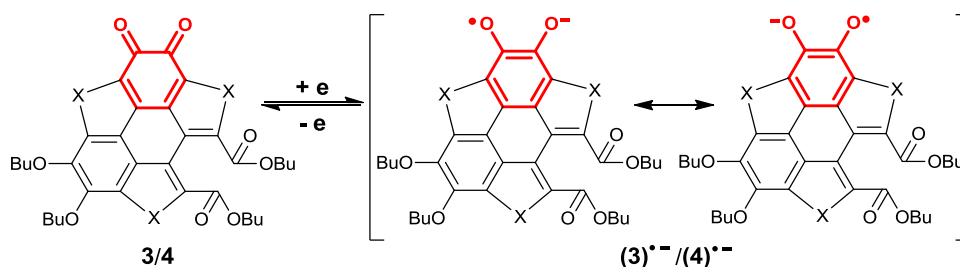

**Scheme S1.** The reaction of **3/4** under the electrochemical condition.

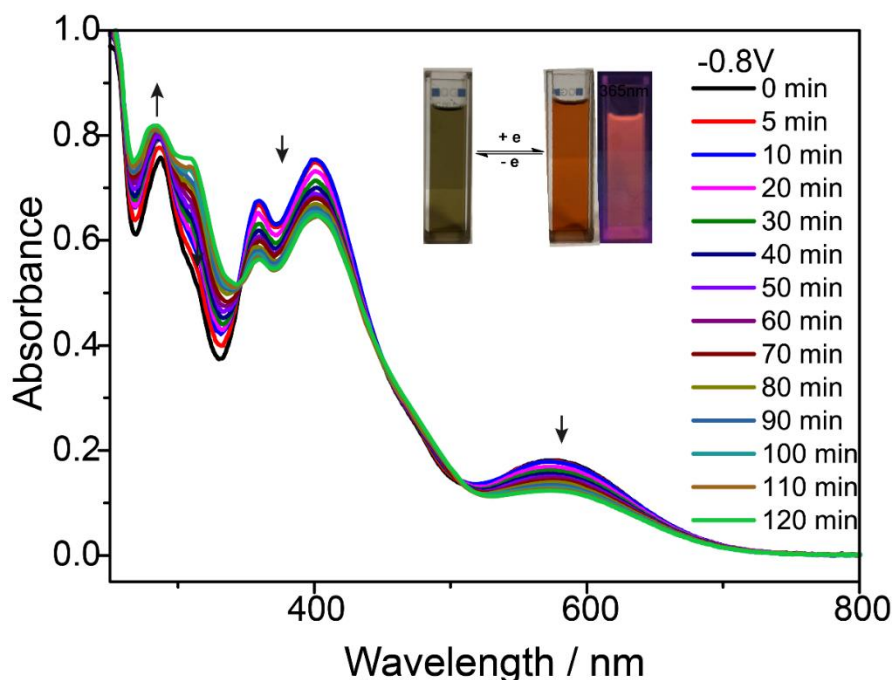

**Figure S3.** Time-dependent UV-Vis spectra of **3** in CH<sub>2</sub>Cl<sub>2</sub> (10<sup>-4</sup> mol L<sup>-1</sup>) under reduction potential of -0.8 V, along with the photographs of **3** in CH<sub>2</sub>Cl<sub>2</sub> (10<sup>-4</sup> mol L<sup>-1</sup>) before and after reduction.

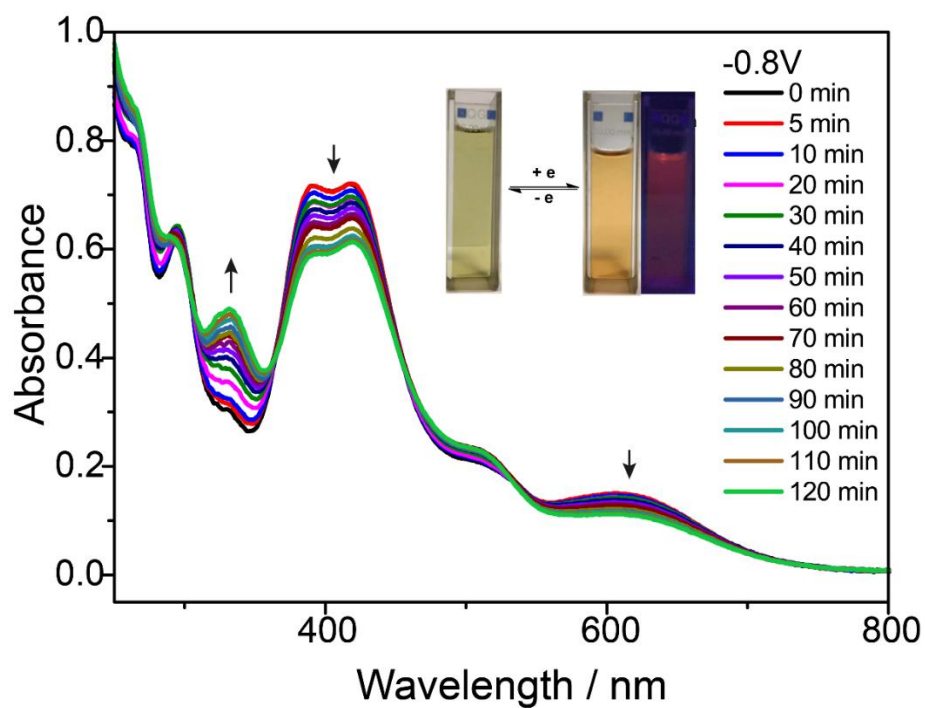

**Figure S4.** Time-dependent UV-Vis spectra of **4** in  $\text{CH}_2\text{Cl}_2$  ( $10^{-4} \text{ mol L}^{-1}$ ) under reduction potential of  $-0.8 \text{ V}$ , along with the photographs of **4** in  $\text{CH}_2\text{Cl}_2$  ( $10^{-4} \text{ mol L}^{-1}$ ) before and after reduction.

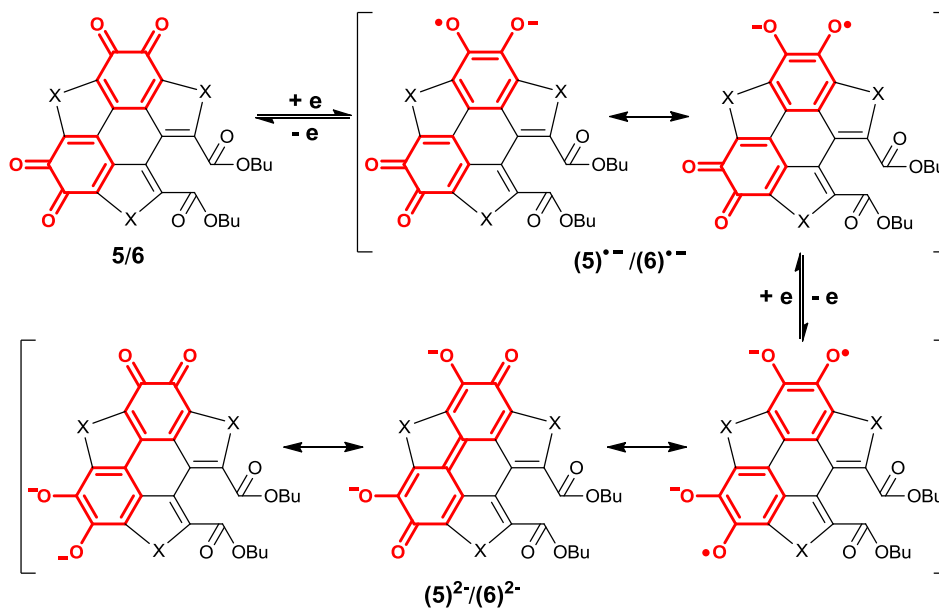

**Scheme S2.** The reaction of **5/6** under the electrochemical condition.

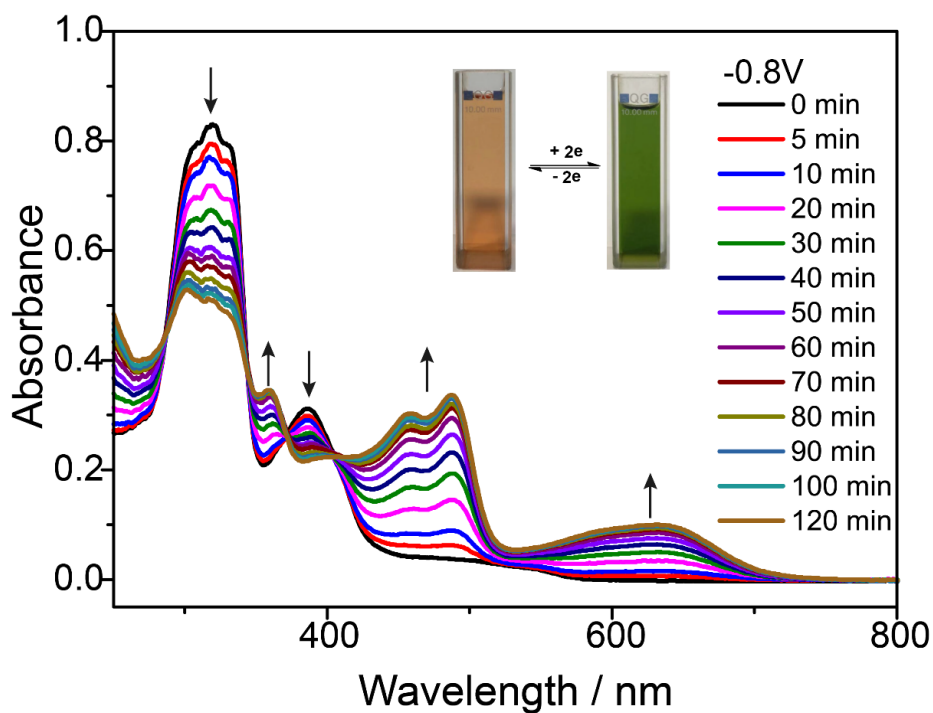

**Figure S5.** Time-dependent UV-Vis spectra of **5** in  $\text{CH}_2\text{Cl}_2$  ( $10^{-4}$  mol  $\text{L}^{-1}$ ) under reduction potential of  $-0.8$  V, along with the photographs of **5** in  $\text{CH}_2\text{Cl}_2$  ( $10^{-4}$  mol  $\text{L}^{-1}$ ) before and after reduction.

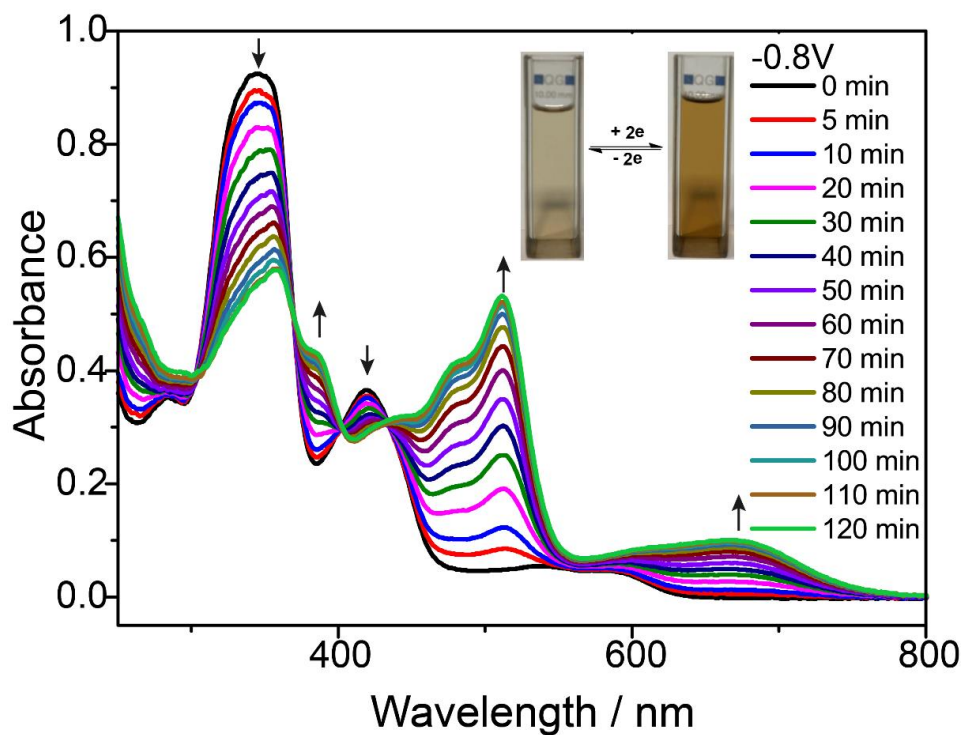

**Figure S6.** Time-dependent UV-Vis spectra of **6** in  $\text{CH}_2\text{Cl}_2$  ( $10^{-4}$  mol  $\text{L}^{-1}$ ) under reduction potential of  $-0.8$  V, along with the photographs of **6** in  $\text{CH}_2\text{Cl}_2$  ( $10^{-4}$  mol  $\text{L}^{-1}$ ) before and after reduction.



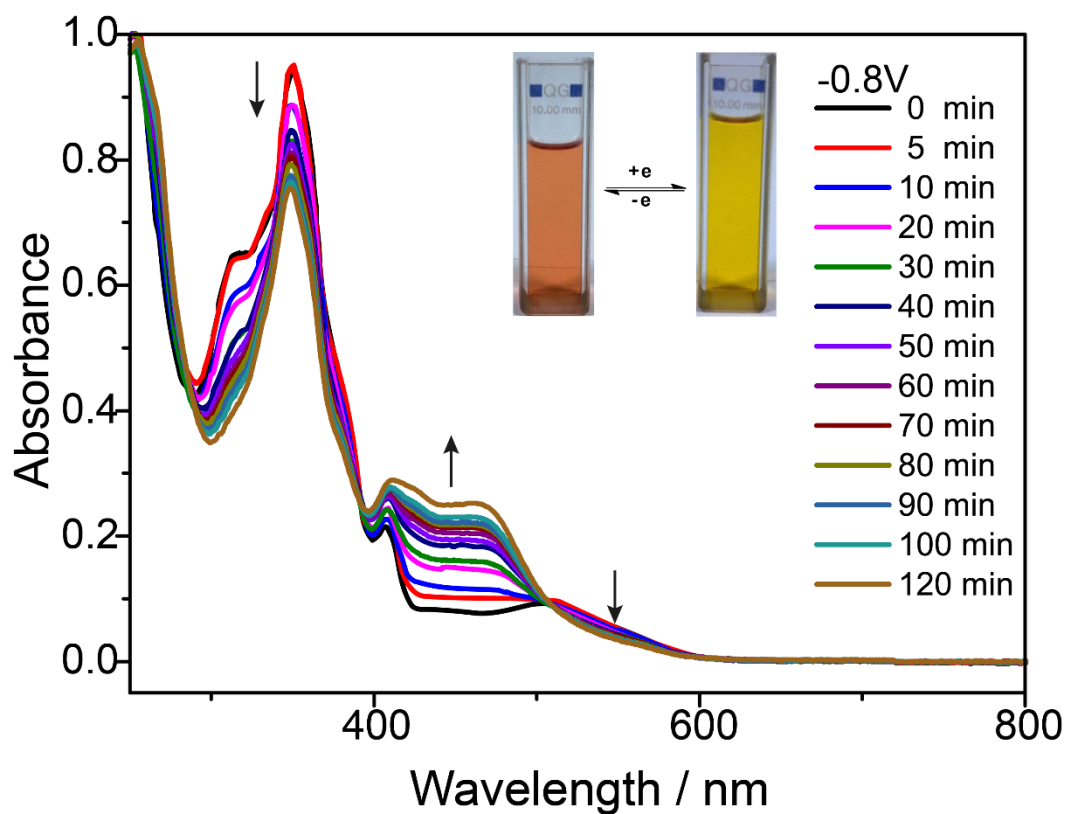

**Figure S7.** Time-dependent UV-Vis spectra of **9** in  $\text{CH}_2\text{Cl}_2$  ( $10^{-4}$  mol  $\text{L}^{-1}$ ) under reduction potential of  $-0.8$  V, along with the photographs of **9** in  $\text{CH}_2\text{Cl}_2$  ( $10^{-4}$  mol  $\text{L}^{-1}$ ) before and after reduction.

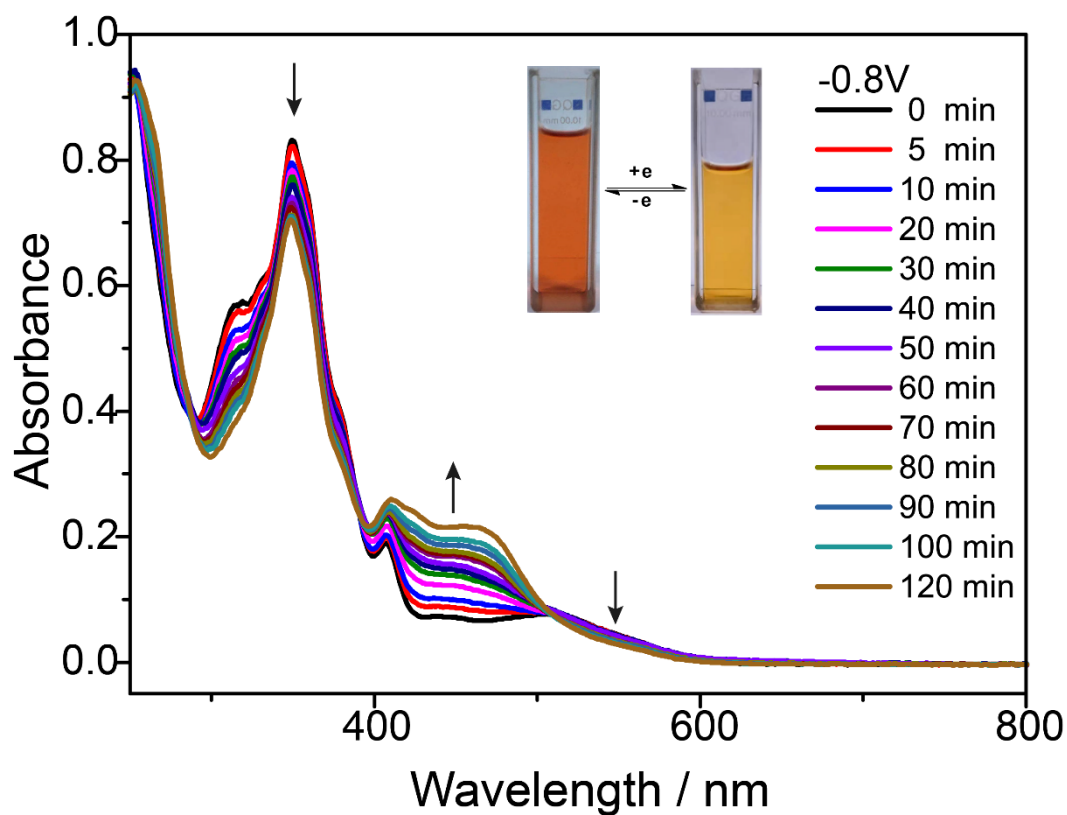

**Figure S8.** Time-dependent UV-Vis spectra of **10** in  $\text{CH}_2\text{Cl}_2$  ( $10^{-4}$  mol  $\text{L}^{-1}$ ) under reduction potential of  $-0.8$  V, along with the photographs of **10** in  $\text{CH}_2\text{Cl}_2$  ( $10^{-4}$  mol  $\text{L}^{-1}$ ) before and after reduction.

## 4.2 UV-Vis spectra

The UV-Vis spectra of the compounds so far obtained were measured in their dichloromethane ( $\text{CH}_2\text{Cl}_2$ ) solution ( $c=1.0 \times 10^{-5} \text{ mol L}^{-1}$ ) at  $20^\circ\text{C}$  on a UV-2600 UV-Vis spectrometer (Shimadzu).

**Table S1.** UV-Vis spectra of compounds **1-10, 16-25** in  $\text{CH}_2\text{Cl}_2$  solution.

| Comp.     | $\lambda_{\text{max}}/\text{nm}$ | $\log \epsilon$ |
|-----------|----------------------------------|-----------------|----------------------------------|-----------------|----------------------------------|-----------------|----------------------------------|-----------------|
| <b>1</b>  | 314                              | 4.91            | 345                              | 4.35            |                                  |                 |                                  |                 |
| <b>2</b>  | 312                              | 4.82            | 341                              | 4.36            |                                  |                 |                                  |                 |
| <b>3</b>  | 287                              | 4.26            | 360                              | 4.22            | 402                              | 4.27            | 578                              | 3.65            |
| <b>4</b>  | 295                              | 4.23            | 393                              | 4.30            | 419                              | 4.30            | 610                              | 3.60            |
| <b>5</b>  | 319                              | 4.70            | 387                              | 4.27            |                                  |                 |                                  |                 |
| <b>6</b>  | 350                              | 4.45            | 423                              | 4.05            |                                  |                 |                                  |                 |
| <b>7</b>  | 321                              | 4.50            | 393                              | 4.36            | 424                              | 4.34            |                                  |                 |
| <b>8</b>  | 262                              | 4.61            | 335                              | 4.27            | 413                              | 4.43            | 437                              | 4.39            |
| <b>9</b>  | 350                              | 4.53            | 408                              | 3.89            | 506                              | 3.52            |                                  |                 |
| <b>10</b> | 350                              | 4.51            | 406                              | 3.93            | 510                              | 3.49            |                                  |                 |
| <b>16</b> | 298                              | 4.67            | 336                              | 4.46            | 404                              | 4.36            | 429                              | 4.40            |
| <b>17</b> | 306                              | 4.72            | 343                              | 4.53            | 440                              | 4.60            |                                  |                 |
| <b>18</b> | 284                              | 4.93            | 379                              | 4.86            | 399                              | 4.86            |                                  |                 |
| <b>19</b> | 286                              | 4.92            | 350                              | 4.62            | 396                              | 4.83            | 412                              | 4.86            |
| <b>20</b> | 274                              | 4.69            | 350                              | 4.73            | 380                              | 4.70            |                                  |                 |
| <b>21</b> | 278                              | 4.80            | 378                              | 4.80            | 396                              | 4.79            |                                  |                 |
| <b>22</b> | 268                              | 4.79            | 313                              | 5.01            | 378                              | 4.71            | 496                              | 4.37            |
| <b>23</b> | 278                              | 4.72            | 311                              | 4.86            | 379                              | 4.68            | 487                              | 4.27            |
| <b>24</b> | 304                              | 4.33            | 364                              | 4.67            | 449                              | 4.06            | 514                              | 4.09            |
| <b>25</b> | 302                              | 4.35            | 358                              | 4.69            | 434                              | 3.93            | 502                              | 3.94            |

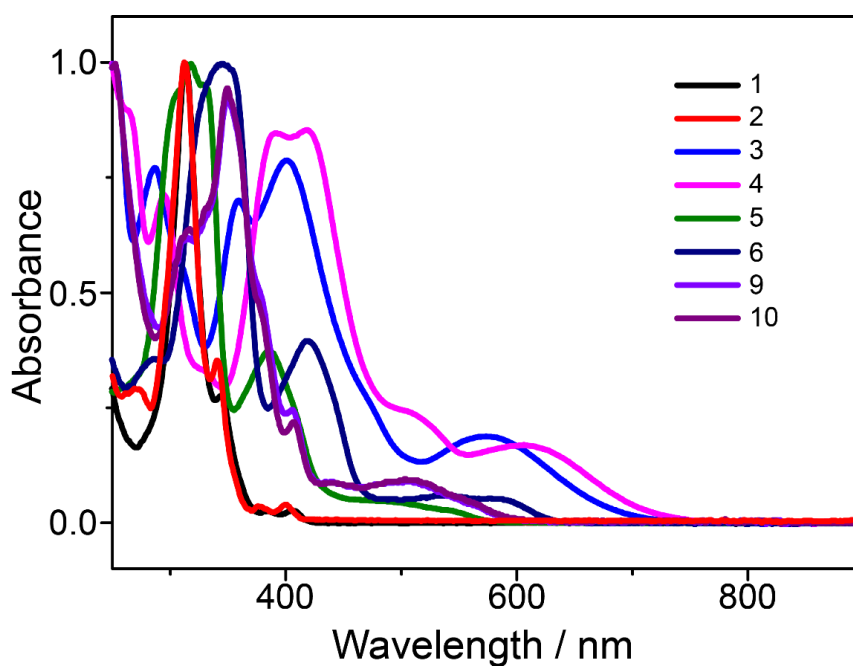

**Figure S9.** UV-Vis absorption spectra of **1-6, 9-10** in  $\text{CH}_2\text{Cl}_2$  ( $10^{-5} \text{ mol L}^{-1}$ ) at  $20^\circ\text{C}$ .

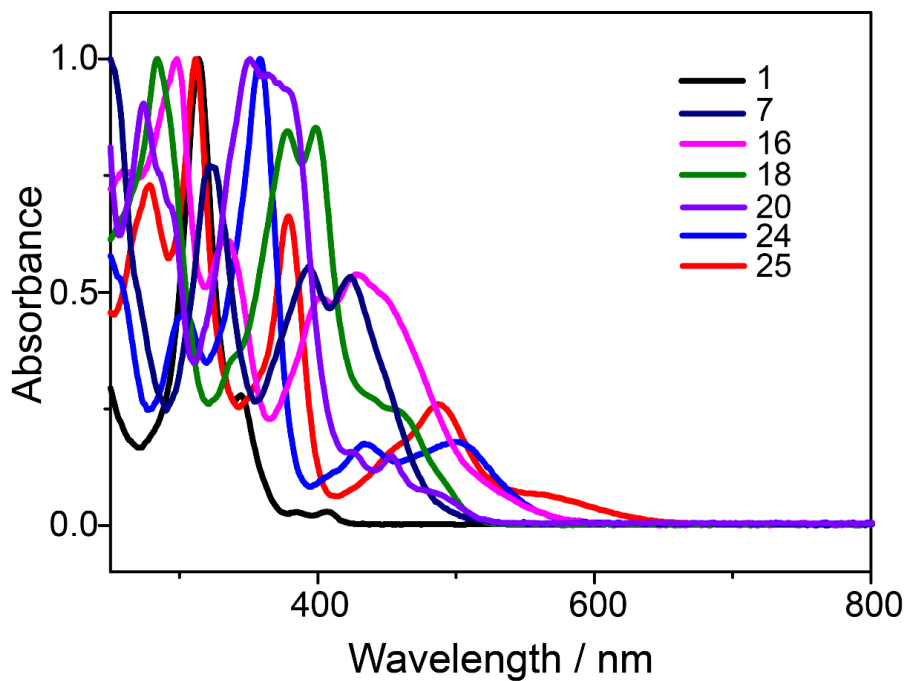

**Figure S10.** UV-Vis absorption spectra of **1, 7, 16, 18, 20, 24, 25** in  $\text{CH}_2\text{Cl}_2$  ( $10^{-5} \text{ mol L}^{-1}$ ) at  $20^\circ\text{C}$ .

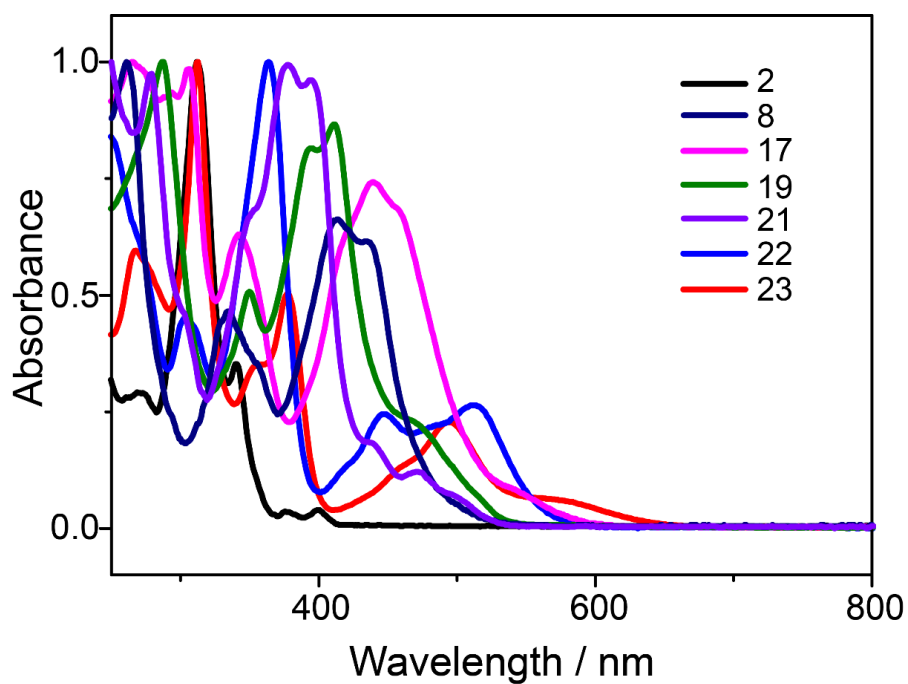

**Figure S11.** UV-Vis absorption spectra of **2, 8, 17, 19, 21-23** in  $\text{CH}_2\text{Cl}_2$  ( $10^{-5} \text{ mol L}^{-1}$ ) at  $20^\circ\text{C}$ .

### 4.3 Fluorescence

Fluorescence excitation and emission spectra were recorded with an RF-5301(pc)s Spectrofluorophotometer, fluorescence lifetime and steady state were measured on FLS920 Spectrofluorophotometer. Measurement conditions: solvent, CH<sub>2</sub>Cl<sub>2</sub>; concentration, 10<sup>-4</sup> mol L<sup>-1</sup>, temperature, 20 °C.

**Table S2.** The emission and excitation properties of compounds **16-19, 22-23** in CH<sub>2</sub>Cl<sub>2</sub> solution.

| Comp.     | $\lambda_{\text{ex}} / \text{nm}$ | $\lambda_{\text{em}} / \text{nm}$ | Stocks shift / cm <sup>-1</sup> | $\Phi_F / \%$ | $\tau_1 / \text{ns}$ | $\tau_2 / \text{ns}$ | $\tau_3 / \text{ns}$ |
|-----------|-----------------------------------|-----------------------------------|---------------------------------|---------------|----------------------|----------------------|----------------------|
| <b>16</b> | 533                               | 691                               | 4289                            | 1.69          | 1.11(96.5%)          | 5.81(3.5%)           |                      |
| <b>17</b> | 535                               | 637                               | 2993                            | 0.15          | 0.35(30.5%)          | 4.17(43%)            | 9.74(26.5%)          |
| <b>18</b> | 493                               | 556                               | 2298                            | 5.71          | 3.99(100%)           |                      |                      |
| <b>19</b> | 500                               | 571                               | 2486                            | 0.13          | 0.19(73.7%)          | 4.08(26.3%)          |                      |
| <b>22</b> | 536                               | 638                               | 2982                            | 17.22         | 6.42(100%)           |                      |                      |
| <b>24</b> | 525                               | 638                               | 3373                            | 43.2          | 19.20(100%)          |                      |                      |

$\lambda_{\text{ex}}$ : excitation wavelength;  $\lambda_{\text{em}}$ : maximum emission wavelength;  $\Phi_F$ : fluorescence quantum yield;  $\tau_1$ : fluorescence lifetime

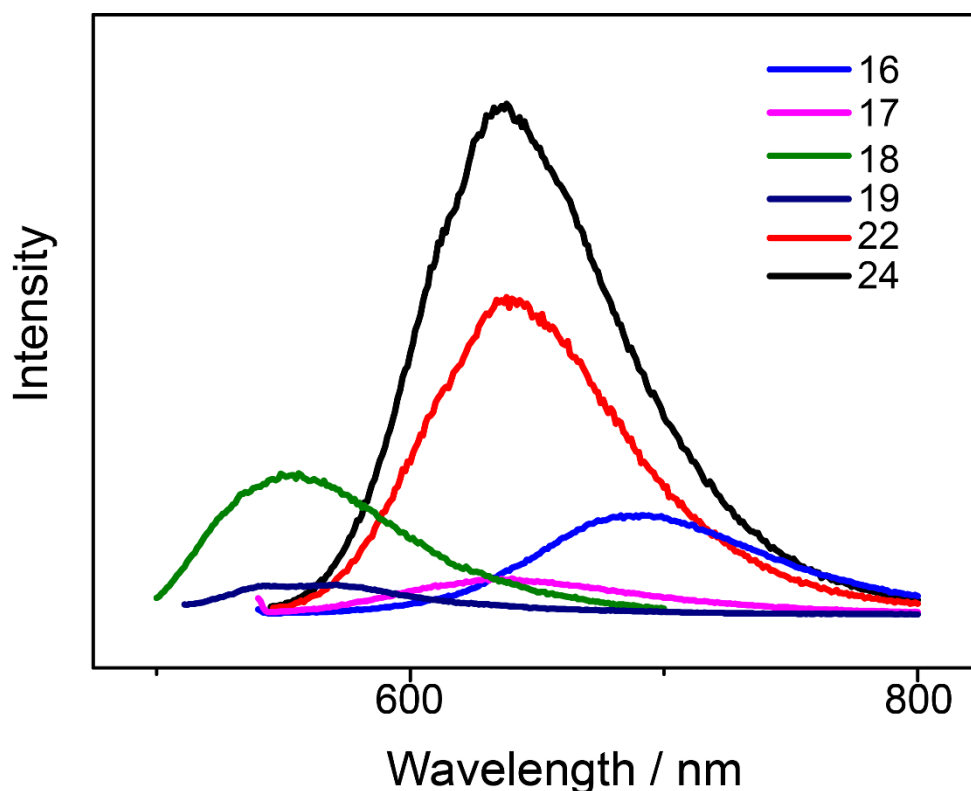

**Figure S12.** Emission spectra of **16-19, 22, 24** in CH<sub>2</sub>Cl<sub>2</sub> (10<sup>-4</sup> mol L<sup>-1</sup>) at 20 °C.

## 5. Thermogravimetric Analyses (TGA)

Thermogravimetric analyses (TGA) were conducted on 1090B type thermal analyzer (Dupont Engineering polymers).

**Table S3.** Thermal stability of compounds **16, 18, 20, 22 and 24**.

| Comp.                | 16  | 18  | 20  | 24  | 25  |
|----------------------|-----|-----|-----|-----|-----|
| $T_d/^\circ\text{C}$ | 340 | 356 | 394 | 332 | 318 |

$T_d$ : degradation temperature

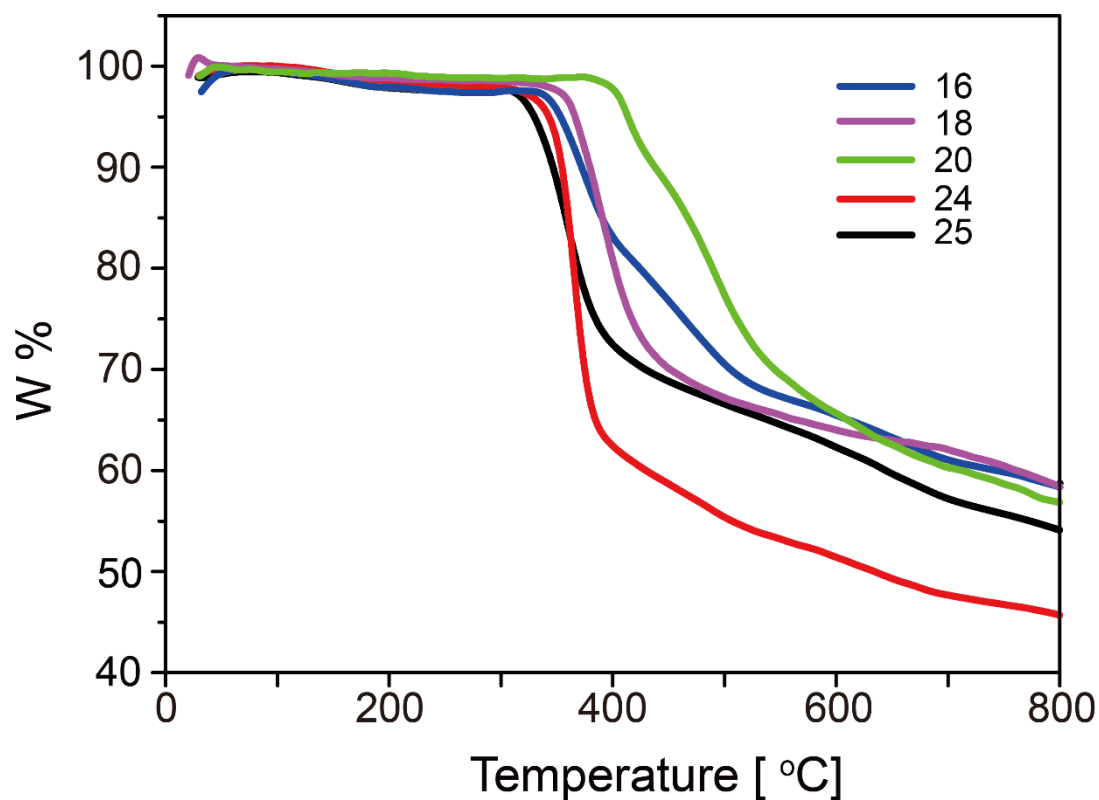

**Figure S13.** Thermogravimetric analyses of compounds **16, 18, 20, 22, 24, 25**.

**Table S4.** Thermal stability of compounds **17, 19, 21, 23 and 25**.

| Comp.                | 17  | 19  | 21  | 22  | 23  |
|----------------------|-----|-----|-----|-----|-----|
| $T_d/^\circ\text{C}$ | 355 | 392 | 403 | 337 | 327 |

$T_d$ : degradation temperature

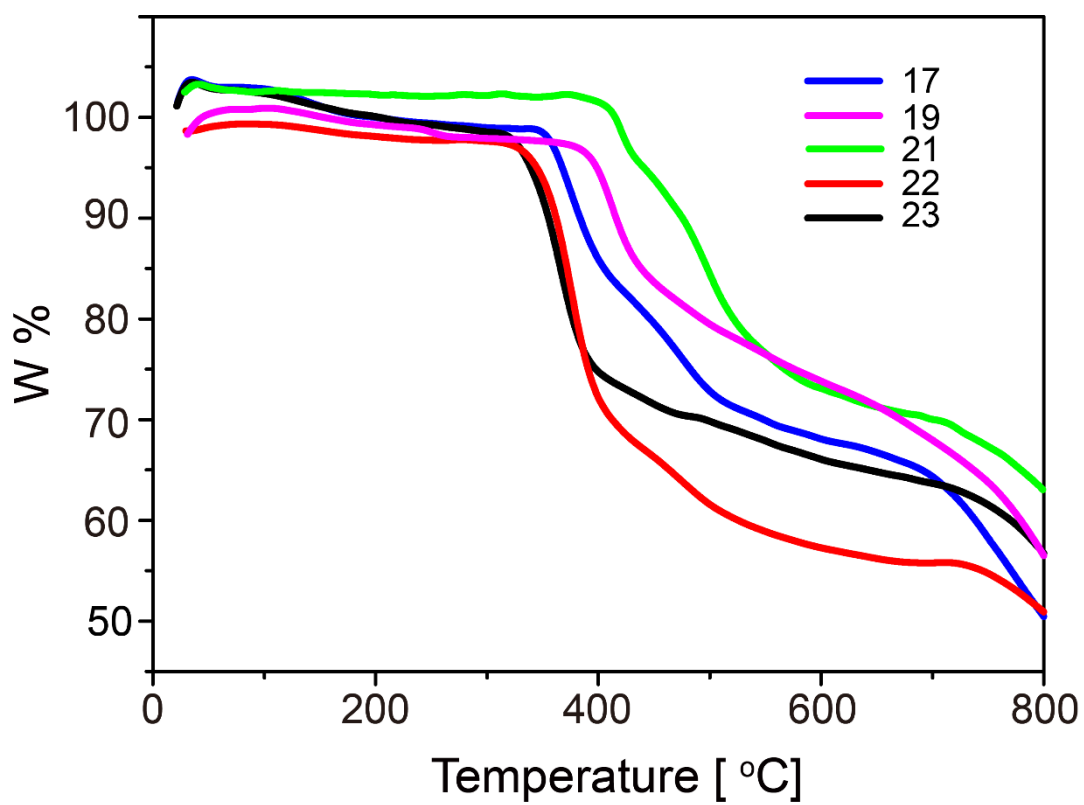

**Figure S14.** Thermogravimetric analyses of compounds **17**, **19**, **21**, **22**, **23**.

## 6. Electrochemical spectra

The redox potentials were obtained by CV and DPV methods on RST 5000 electrochemical analyzer with glassy carbon discs as the working electrode, Pt wire as the counter electrode, and SCE electrode as the reference electrode. Measurement conditions: solvent,  $\text{CH}_2\text{Cl}_2$ ; concentration,  $1 \times 10^{-4} \text{ mol L}^{-1}$ ; supporting electrolyte,  $(n\text{-Bu})_4\text{NPF}_6$  (0.1 M); scan speed,  $50 \text{ mV S}^{-1}$ ; temperature,  $20^\circ\text{C}$ .

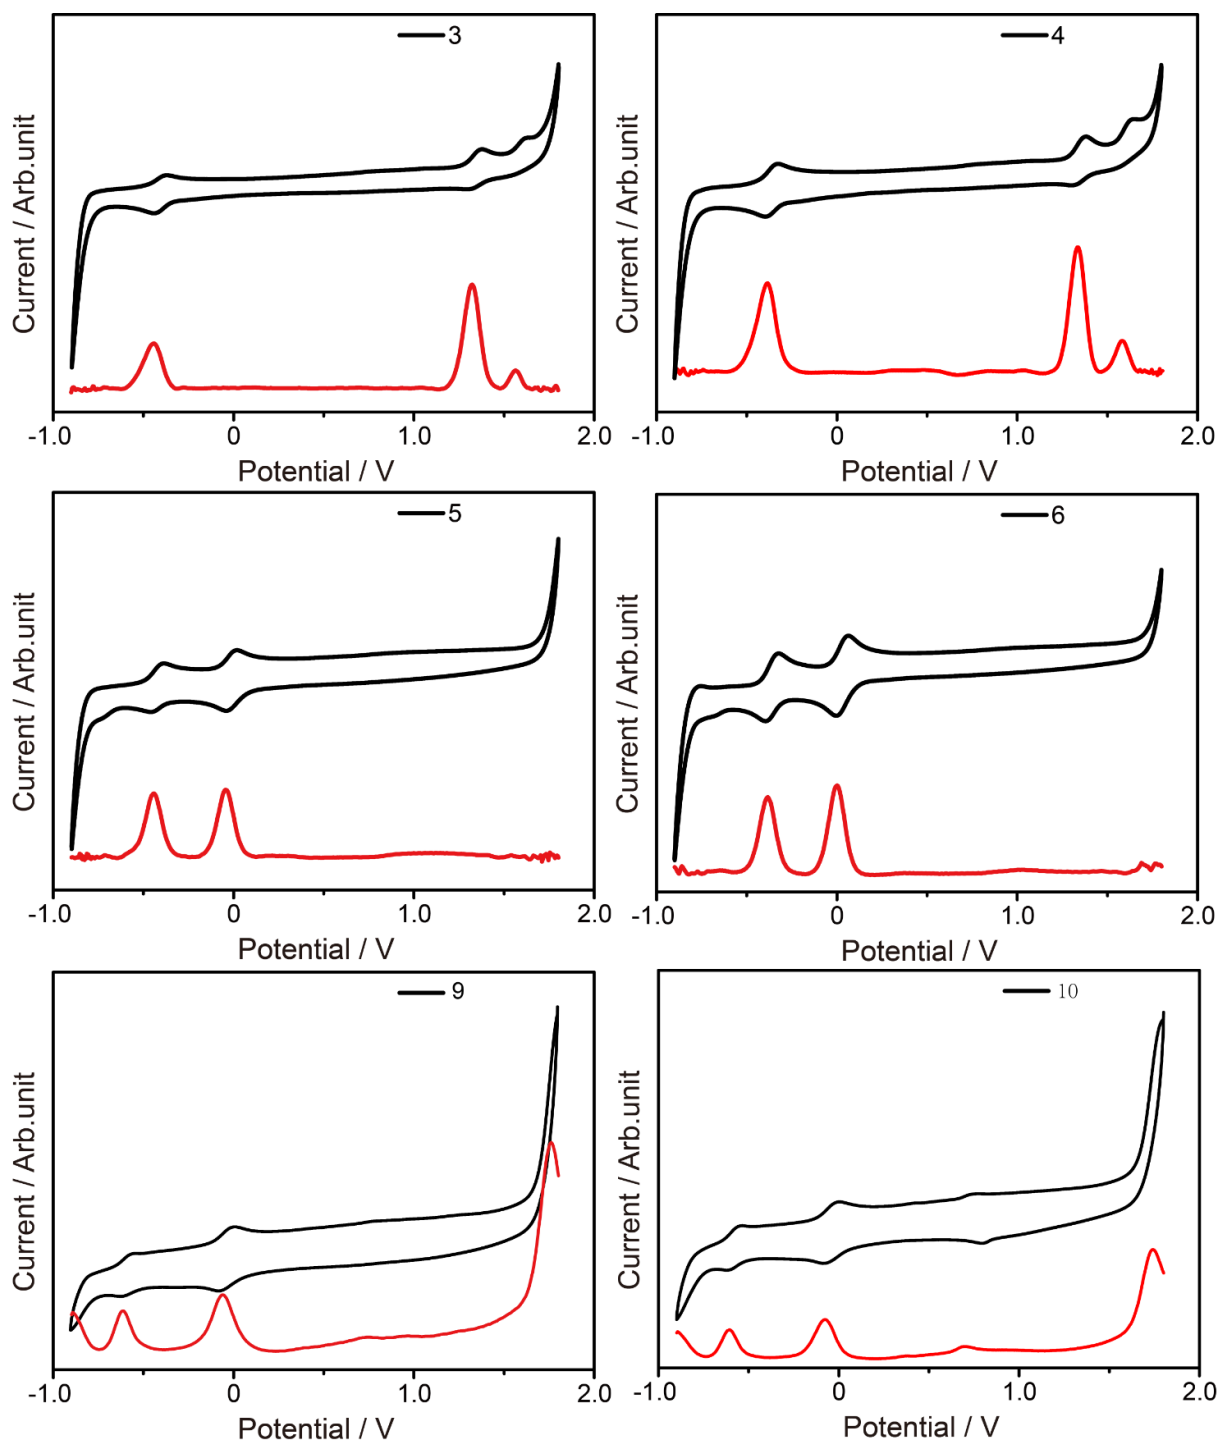

**Figure S15.** CV and DPV of **3**, **4**, **5**, **6**, **7**, **9**, and **10** in  $\text{CH}_2\text{Cl}_2$  ( $c = 10^{-4} \text{ mol L}^{-1}$ ) at RT. Reference electrode: SCE.

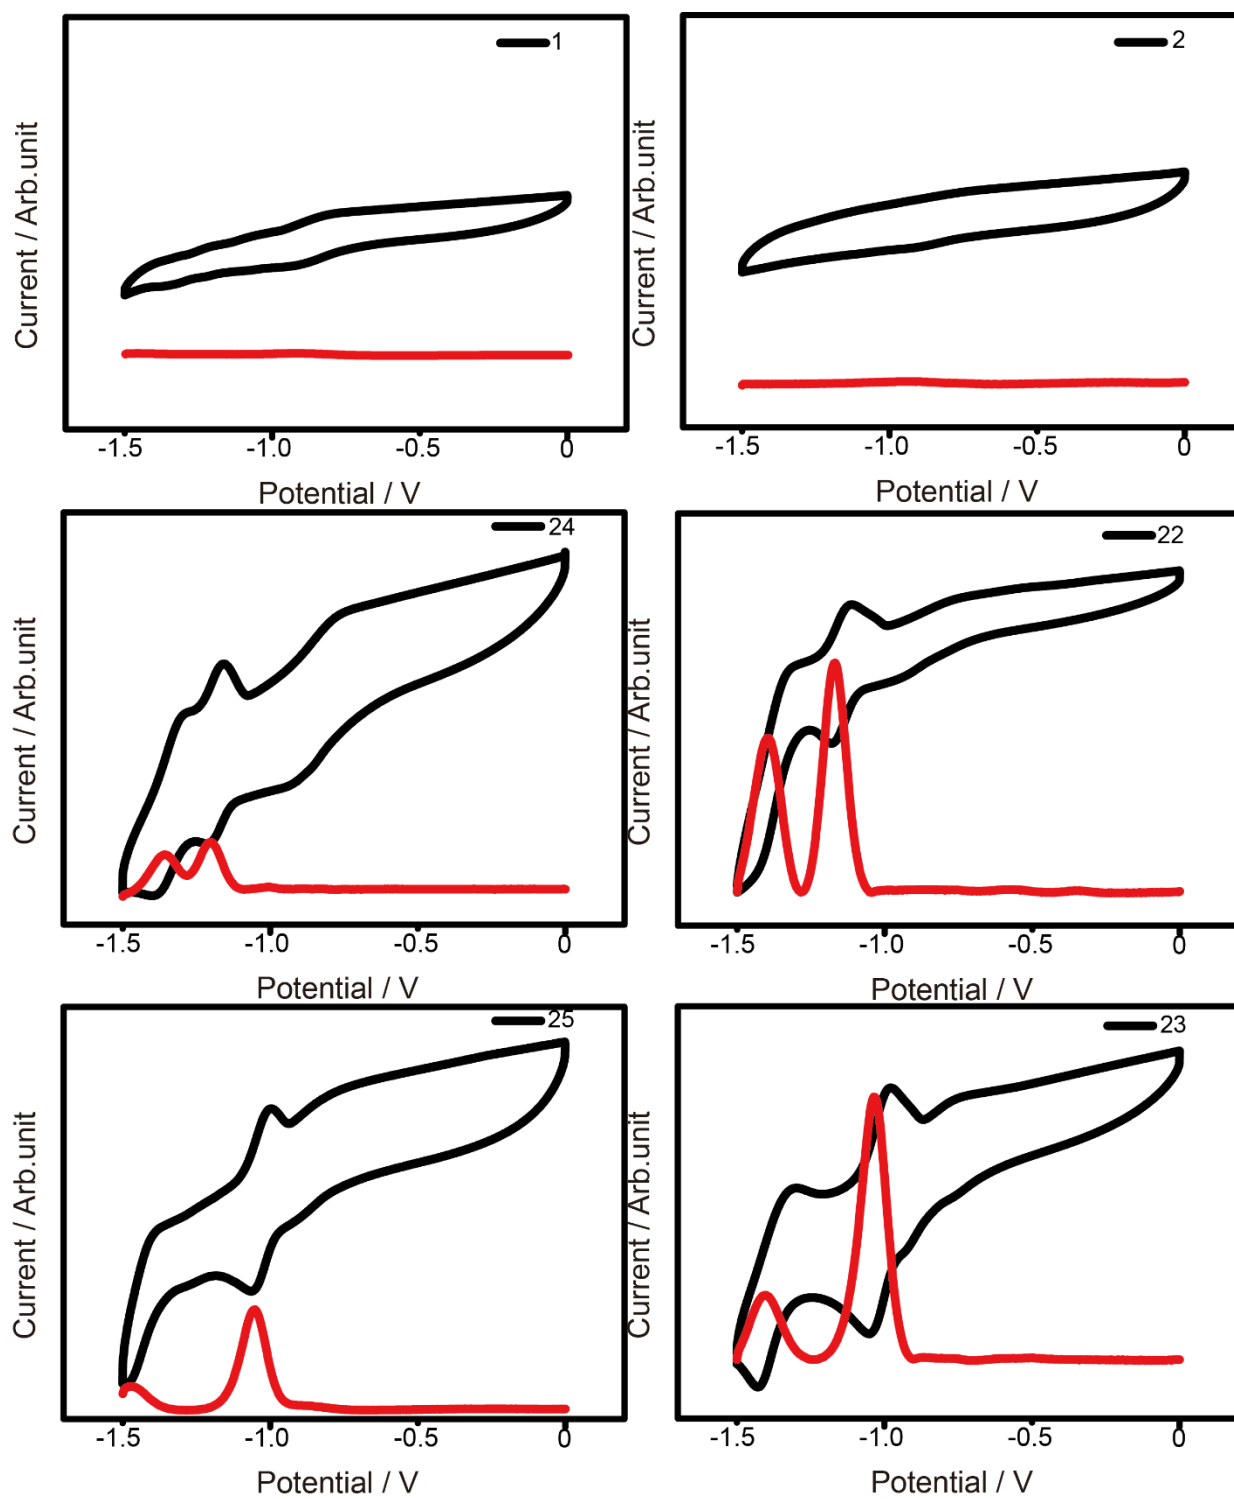

**Figure S16.** CV and DPV of **1-2** and **22-25** in  $\text{CH}_2\text{Cl}_2$  ( $c = 10^{-4} \text{ mol L}^{-1}$ ) at RT. Reference electrode: SCE.



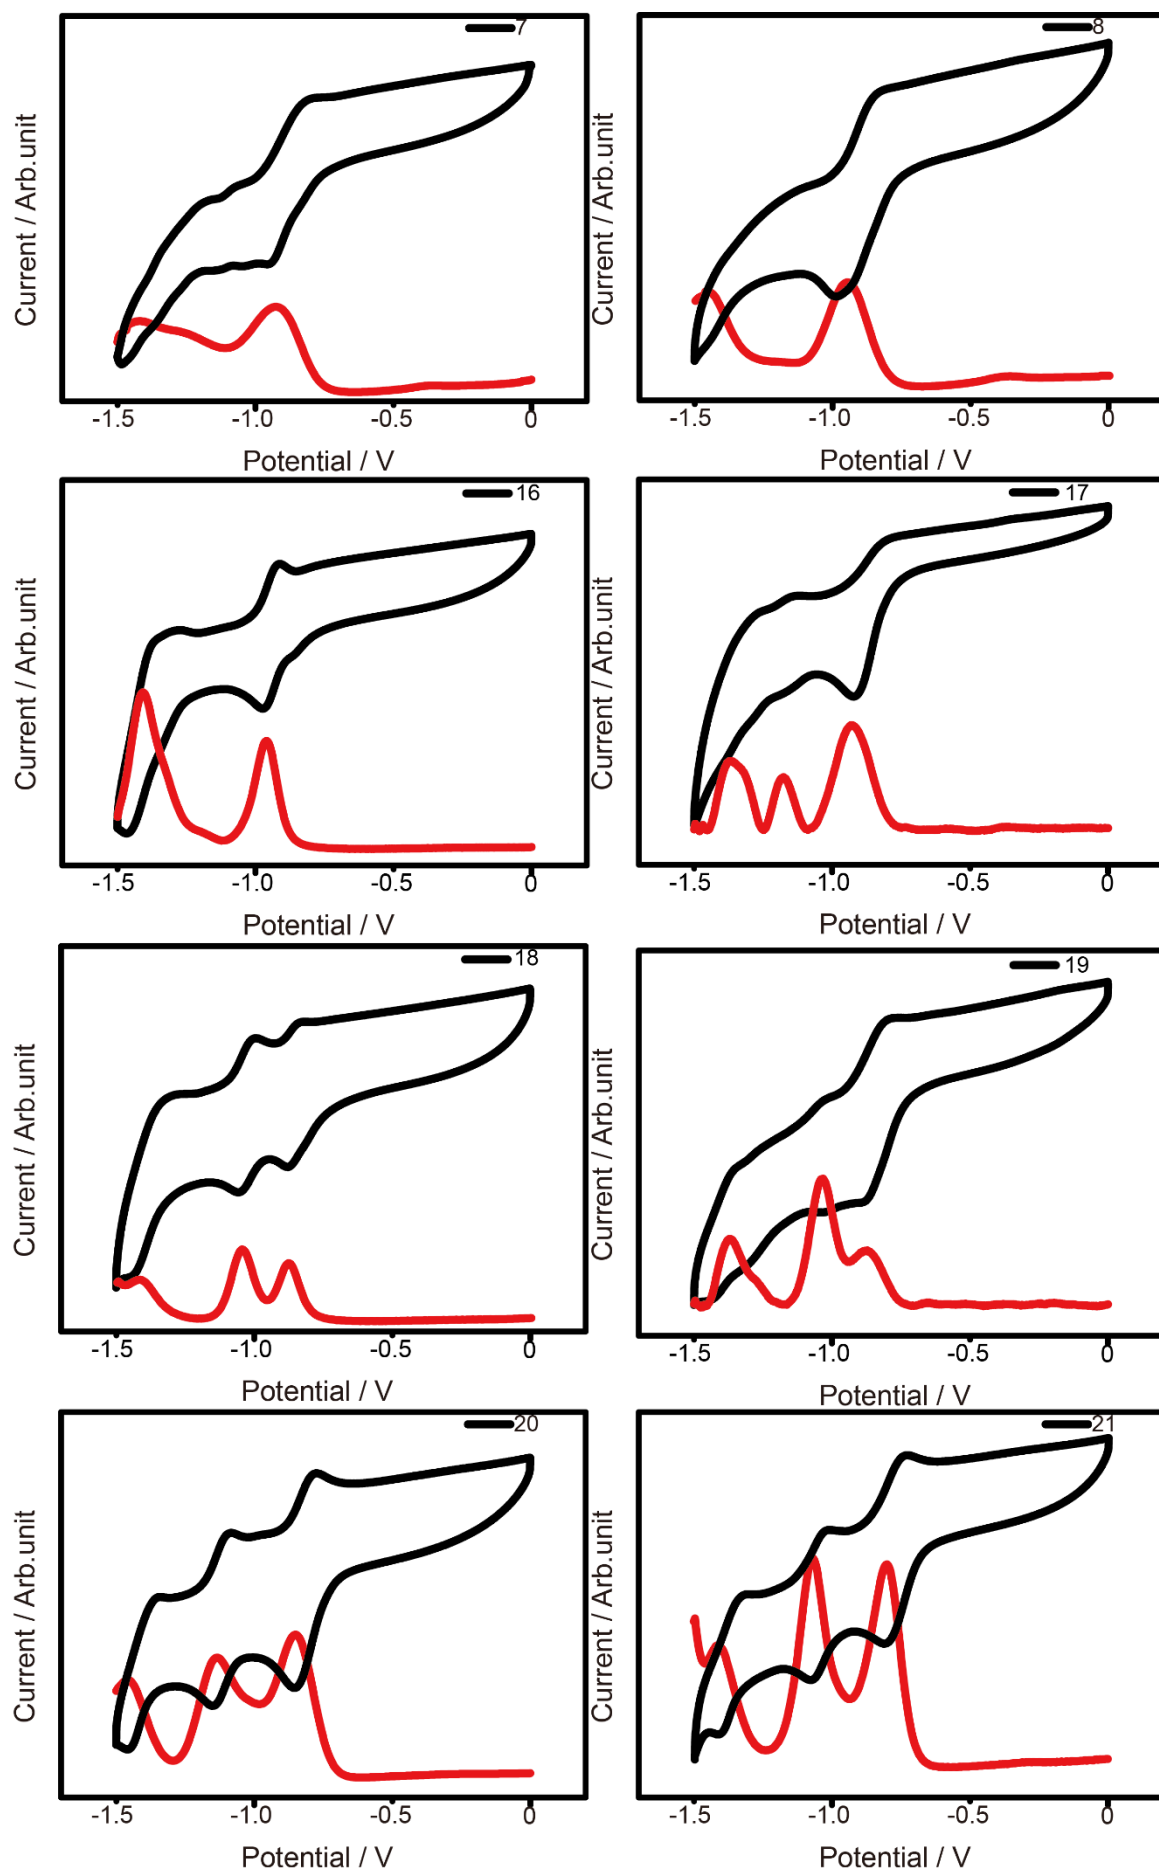

**Figure S17.** CV and DPV of **7-8** and **16-21** in  $\text{CH}_2\text{Cl}_2$  ( $c = 10^{-4} \text{ mol L}^{-1}$ ) at RT. Reference electrode: SCE.

## 7. Theoretical calculations

All calculations were carried out with the Gaussian 16 programs. For DFT calculations, we used the hybrid gradient corrected exchange functional of Lee, Yang, and Parr. A standardized 6-31G basis set was used together with polarization (d) functions. The UV-Vis absorption spectra were calculated at TD- $\omega$ B97XD / IEFPCM(CH<sub>2</sub>Cl<sub>2</sub>) (nstates = 40, root = 1) level of theory using optimized structures. The optimized structures and molecular orbitals are displayed using Chemcraft.<sup>[S8]</sup> The calculated UV-Vis absorption spectra were displayed using Multiwfn software.<sup>[S9]</sup>

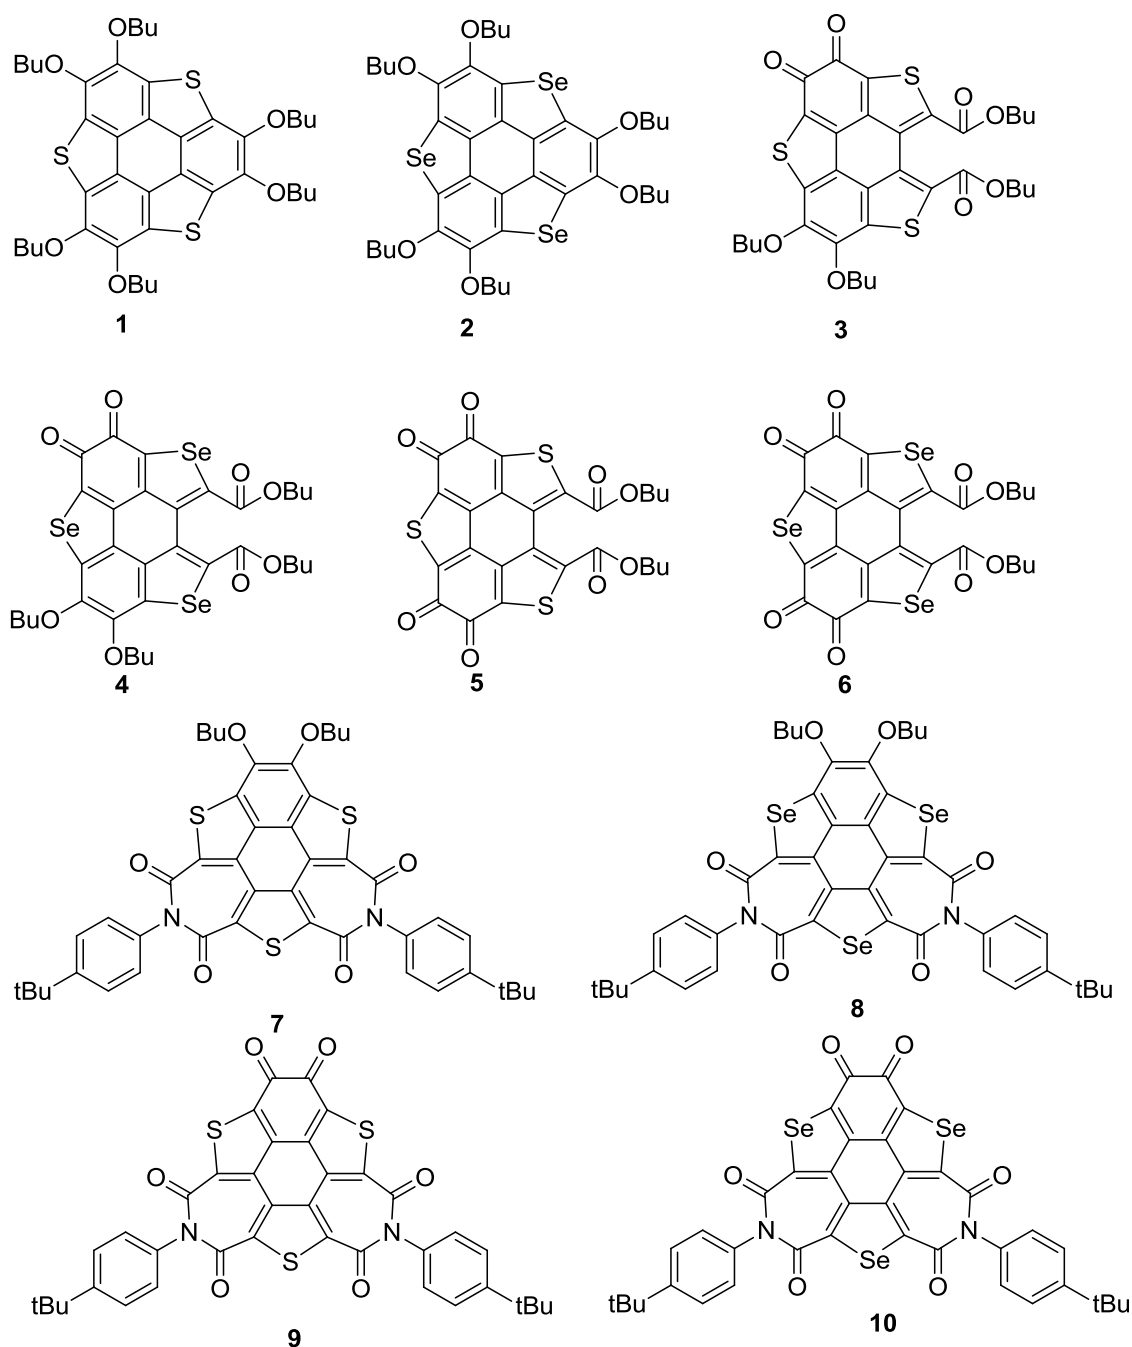

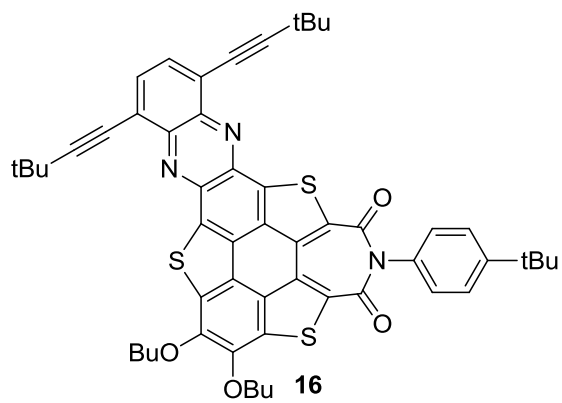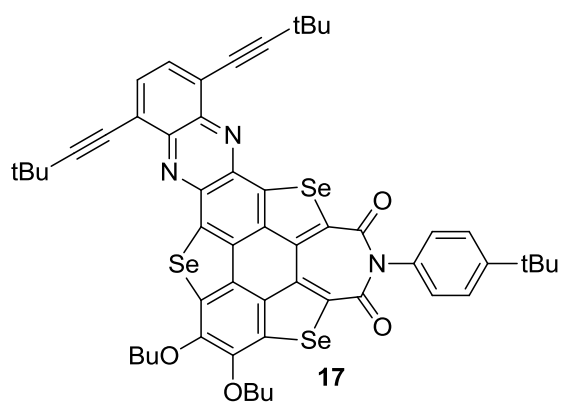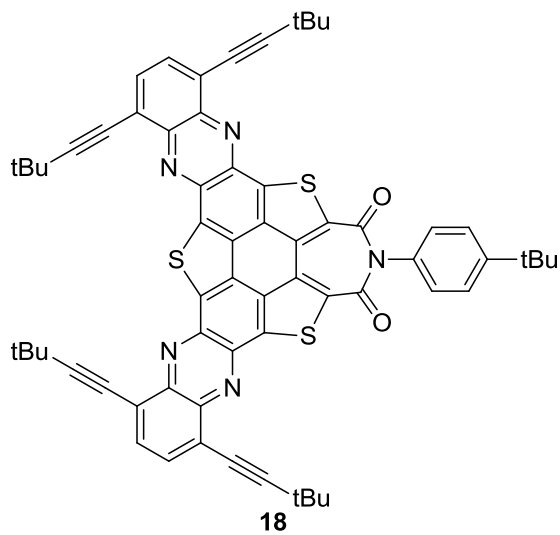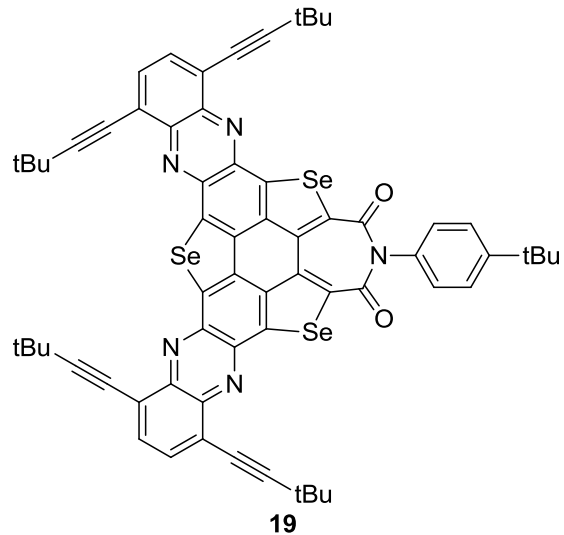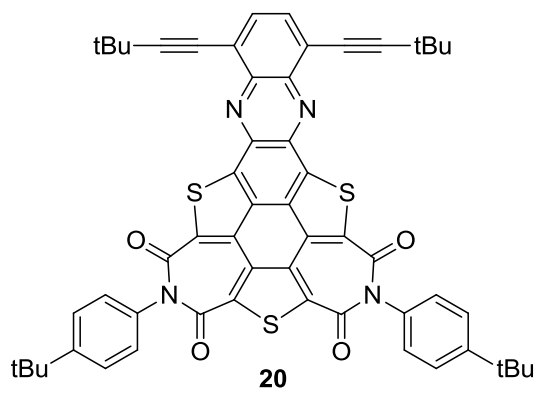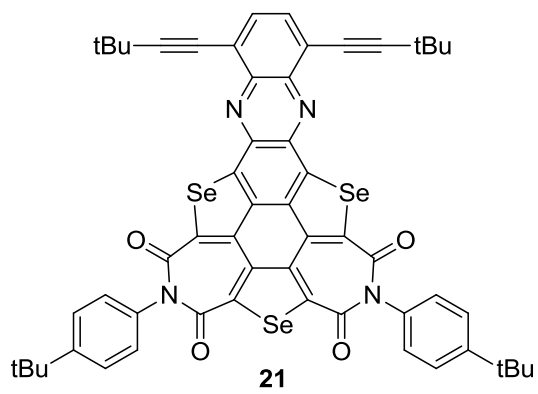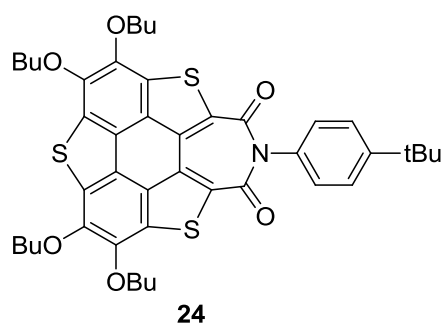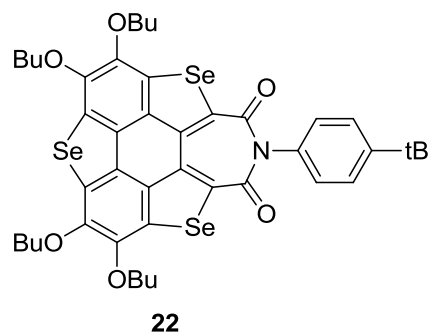

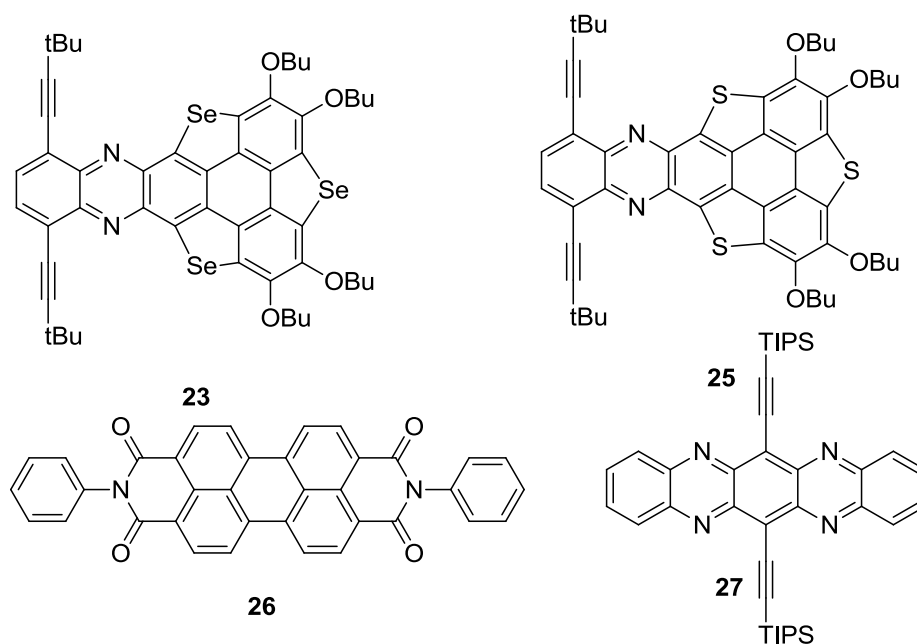

**Scheme S3.** The chemical structures of mentioned compounds **1-10** and **16-25**.

## 7.1 Optimized Structures, Molecular Orbitals and Corresponding Energies

**Table S5.** The calculated energy levels for the frontier orbitals for compounds **1-10** and **16-25**.

| Compound | Energy levels / eV |        |       |       |        |        | $E_g^{[a]}$ |
|----------|--------------------|--------|-------|-------|--------|--------|-------------|
|          | HOMO-2             | HOMO-1 | HOMO  | LUMO  | LUMO+1 | LUMO+2 |             |
| 1        | -6.22              | -5.15  | -5.01 | -0.97 | -0.86  | -0.40  | 4.03        |
| 2        | -6.18              | -5.21  | -5.03 | -0.97 | -0.87  | -0.22  | 4.06        |
| 3        | -6.81              | -6.60  | -6.01 | -3.33 | -2.57  | -1.00  | 2.68        |
| 4        | -6.74              | -6.39  | -5.85 | -3.35 | -2.56  | -1.06  | 2.50        |
| 5        | -7.31              | 7.19   | -7.14 | -4.16 | -3.54  | -2.90  | 2.98        |
| 6        | -7.14              | -6.99  | -6.92 | -4.15 | -3.55  | -2.89  | 2.77        |
| 7        | -6.40              | -6.40  | -6.04 | -2.73 | -2.72  | -1.55  | 3.31        |
| 8        | -6.41              | -6.28  | -5.90 | -2.72 | -2.69  | -1.52  | 3.17        |
| 9        | -6.98              | -6.69  | -6.69 | -3.94 | -3.14  | -2.99  | 2.75        |
| 10       | -6.80              | -6.69  | -6.68 | -3.89 | -3.10  | -2.93  | 2.79        |
| 16       | -6.23              | -5.82  | -5.55 | -2.77 | -2.54  | -1.44  | 2.78        |
| 17       | -6.03              | -5.74  | -5.50 | -2.77 | -2.54  | -1.43  | 2.72        |
| 18       | -6.13              | -5.70  | -5.62 | -2.93 | -2.72  | -2.55  | 2.69        |
| 19       | -5.99              | -5.68  | -5.60 | -2.96 | -2.73  | -2.57  | 2.65        |
| 20       | -6.45              | -6.44  | -5.79 | -3.05 | -2.74  | -2.71  | 2.74        |
| 21       | -6.38              | -6.23  | -5.75 | -3.03 | -2.73  | -2.67  | 2.72        |
| 22       | -6.18              | -5.89  | -5.37 | -2.49 | -1.36  | -0.88  | 2.88        |
| 23       | -5.50              | -5.40  | -4.93 | -2.49 | -1.08  | -0.95  | 2.44        |
| 24       | -6.15              | -6.08  | -5.46 | -2.50 | -1.38  | -0.89  | 2.96        |
| 25       | -5.58              | -5.50  | -5.04 | -2.48 | -1.12  | -1.07  | 2.57        |
| 26       | -6.77              | -6.77  | -5.98 | -3.44 | -1.84  | -1.71  | 2.54        |
| 27       | -6.67              | -6.63  | -5.29 | -3.45 | -1.88  | -1.00  | 1.84        |

[a] $E_g = E_{LUMO} - E_{HOMO}$

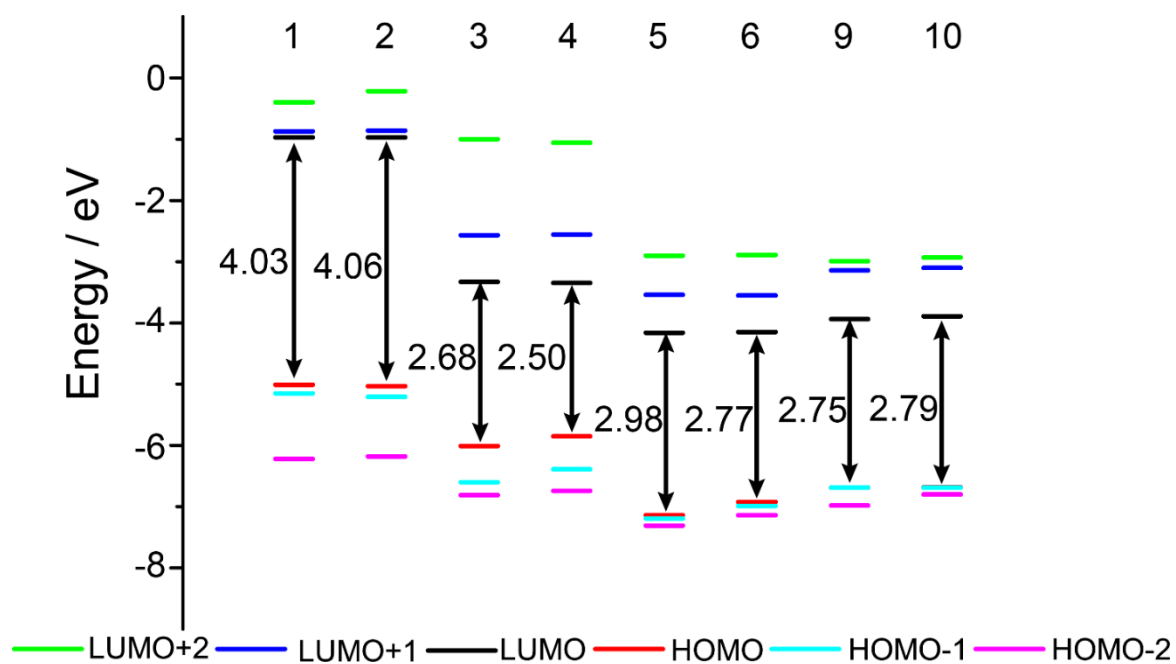

Figure S18. Schematic plot of HOMO-LUMO levels of compounds 1-6 and 9-10.

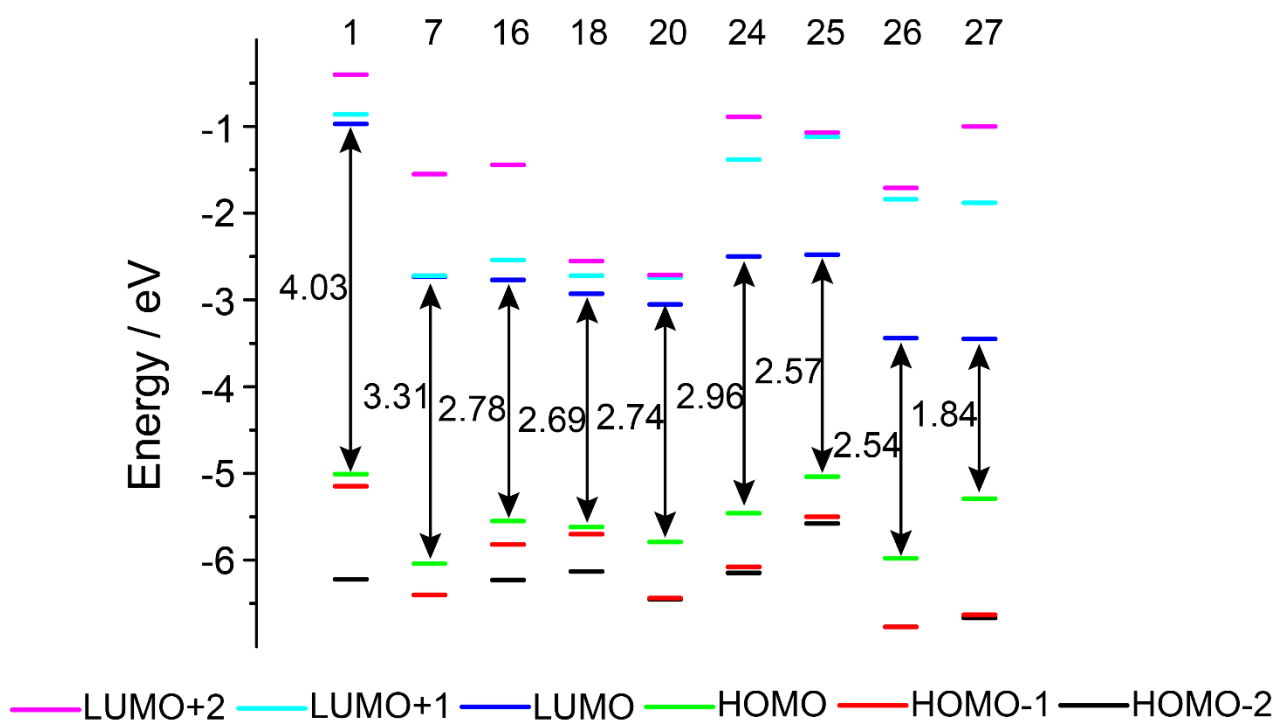

Figure S19. Schematic plot of HOMO-LUMO levels of compounds 1, 7, 16, 18, 20, and 24-27.

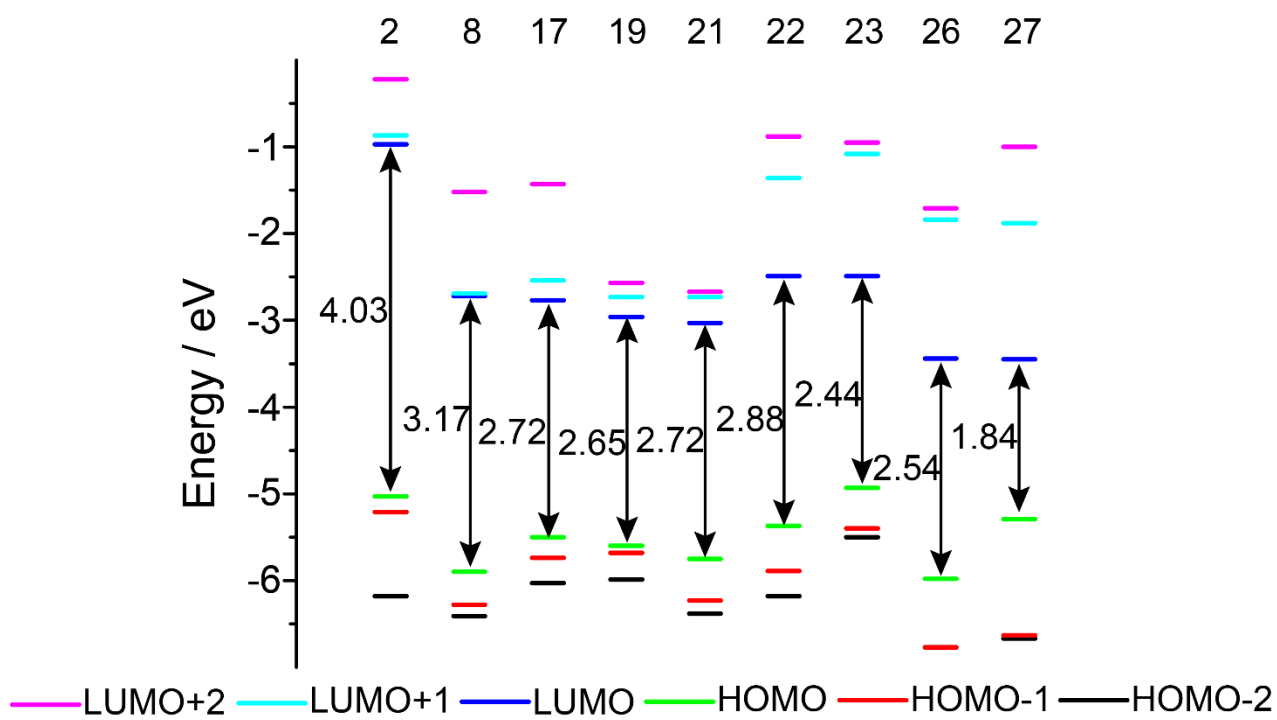

Figure S20. Schematic plot of HOMO-LUMO levels of compounds 2, 8, 17, 19, 21-23, 26, and 27.

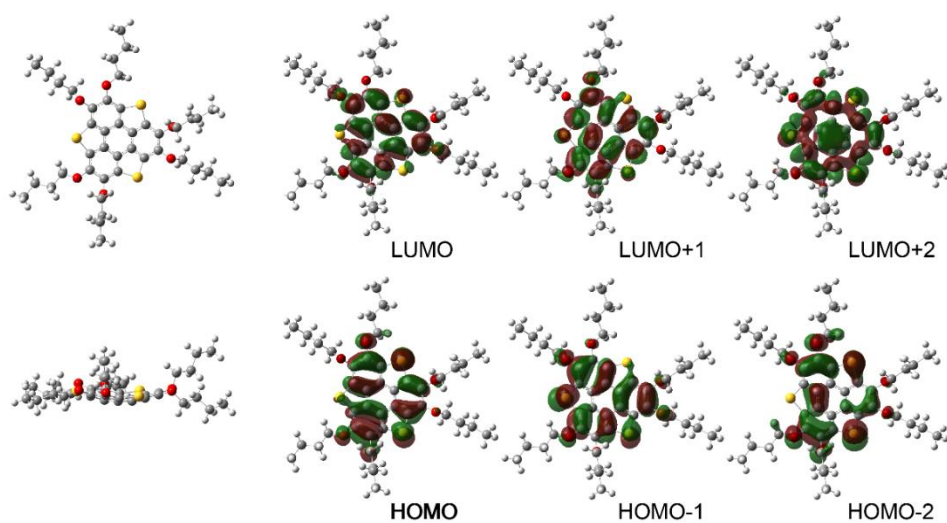

Figure S21. Calculated molecular orbitals of compound 1.

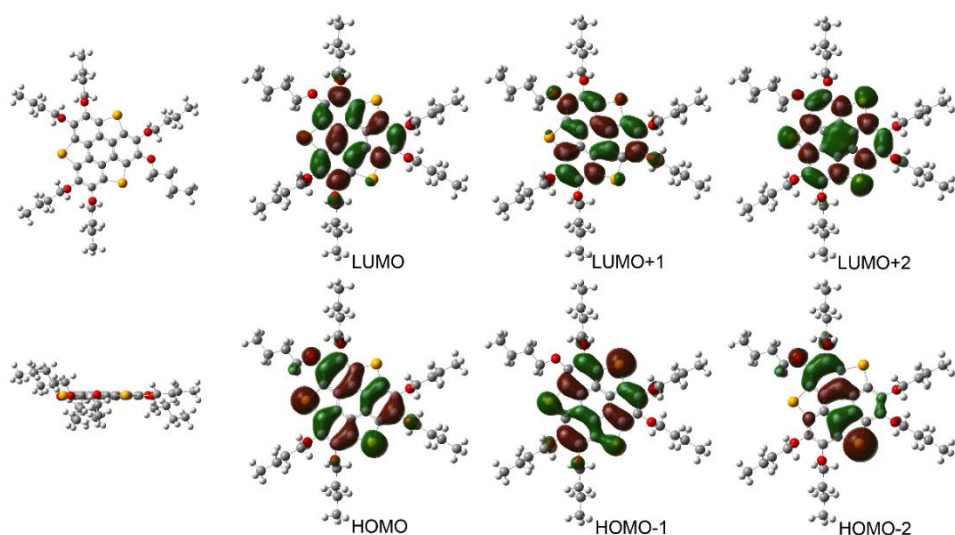

**Figure S22.** Calculated molecular orbitals of compound 2.

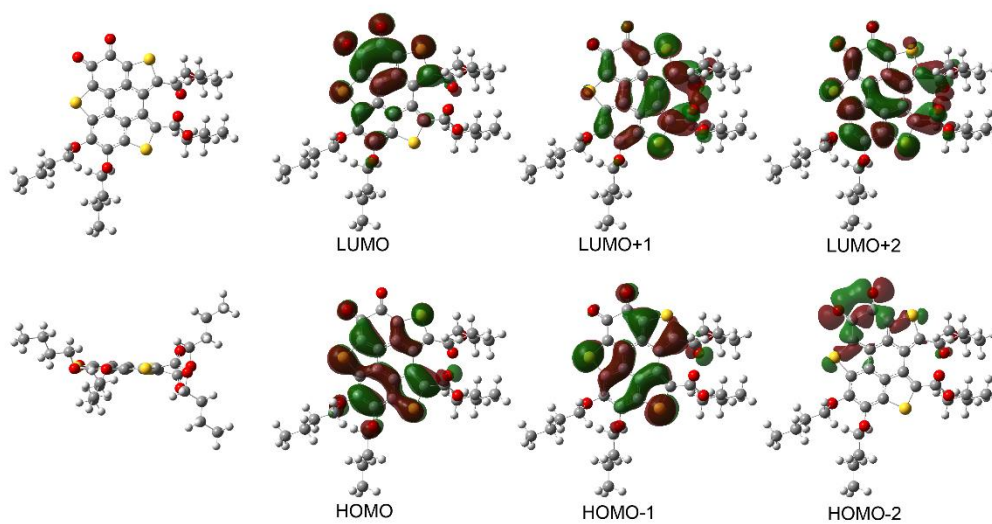

**Figure S23.** Calculated molecular orbitals of compound 3.

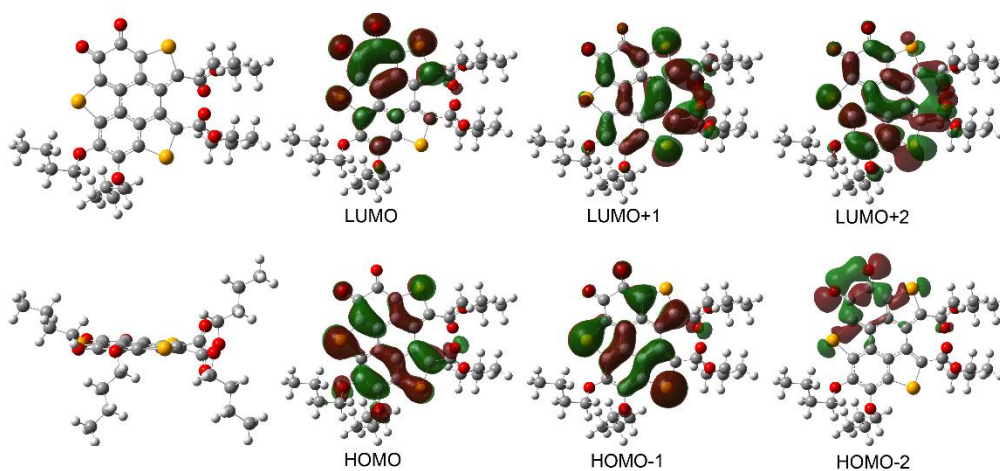

**Figure S24.** Calculated molecular orbitals of compound 4.



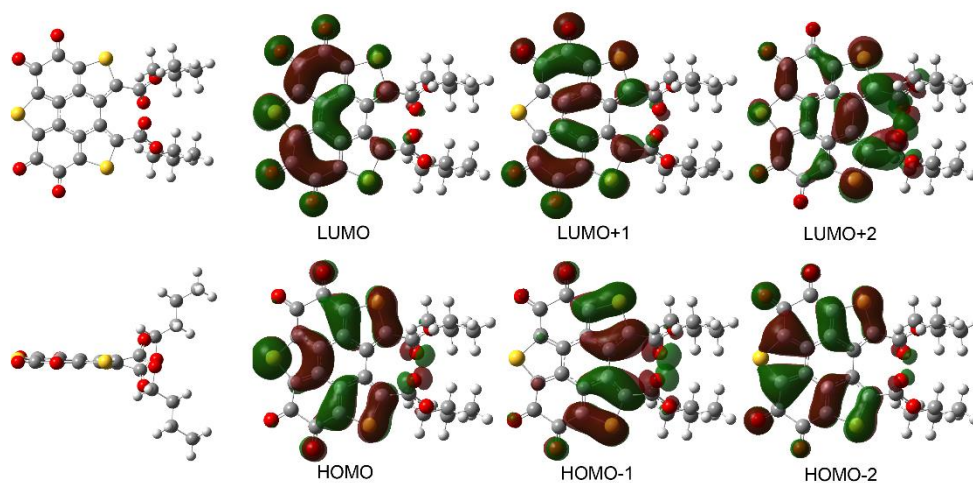

**Figure S25.** Calculated molecular orbitals of compound 5.

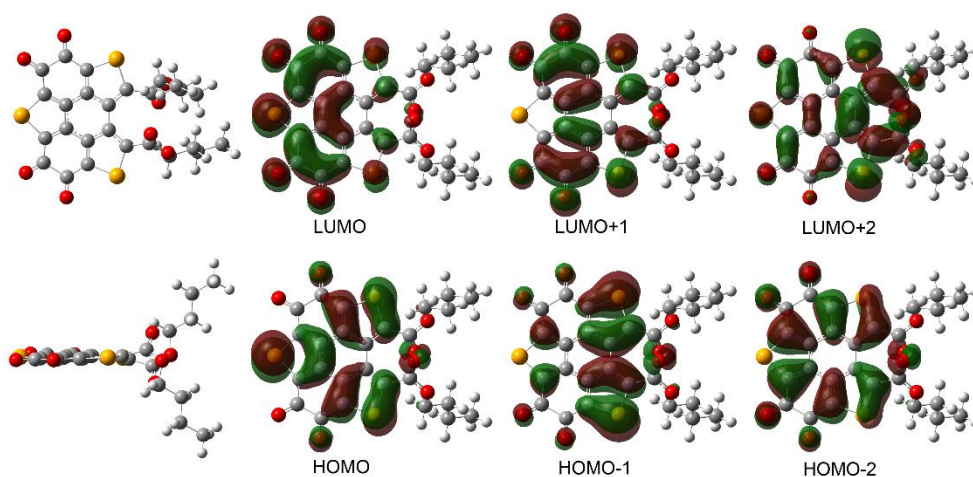

**Figure S26.** Calculated molecular orbitals of compound 6.

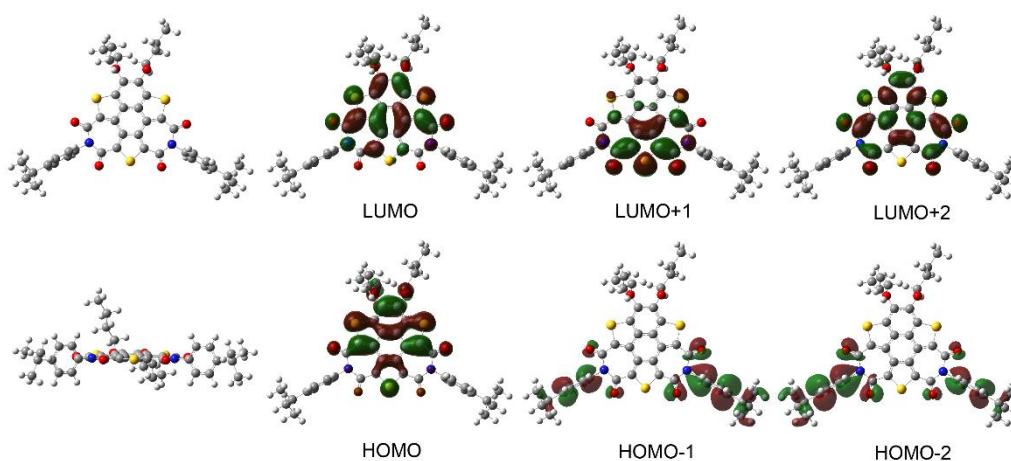

**Figure S27.** Calculated molecular orbitals of compound 7.



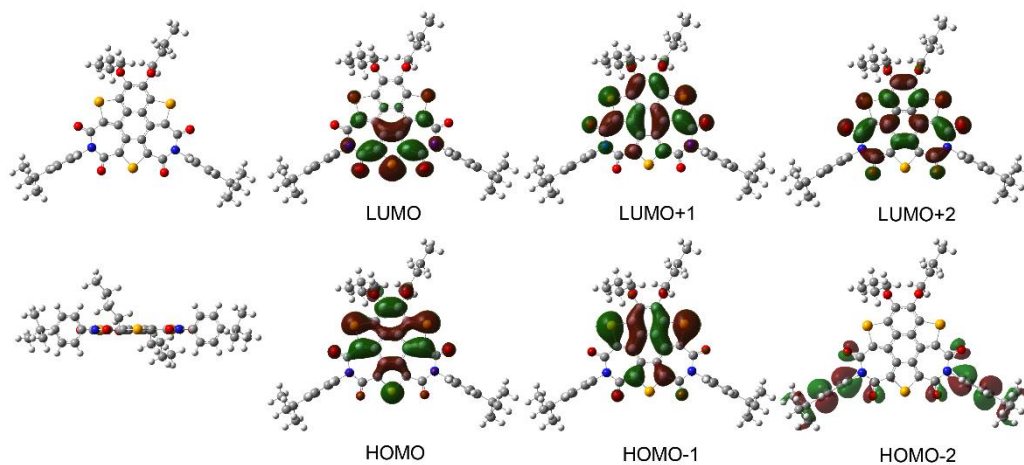

**Figure S28.** Calculated molecular orbitals of compound **8**.

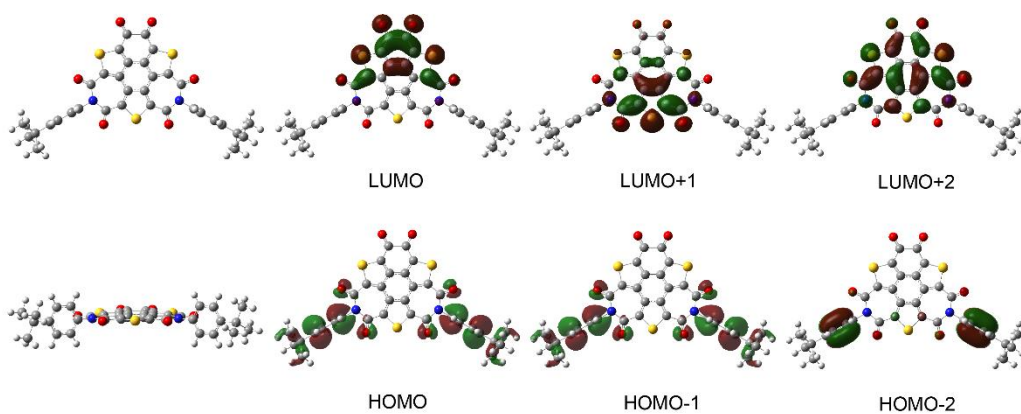

**Figure S29.** Calculated molecular orbitals of compound **9**.

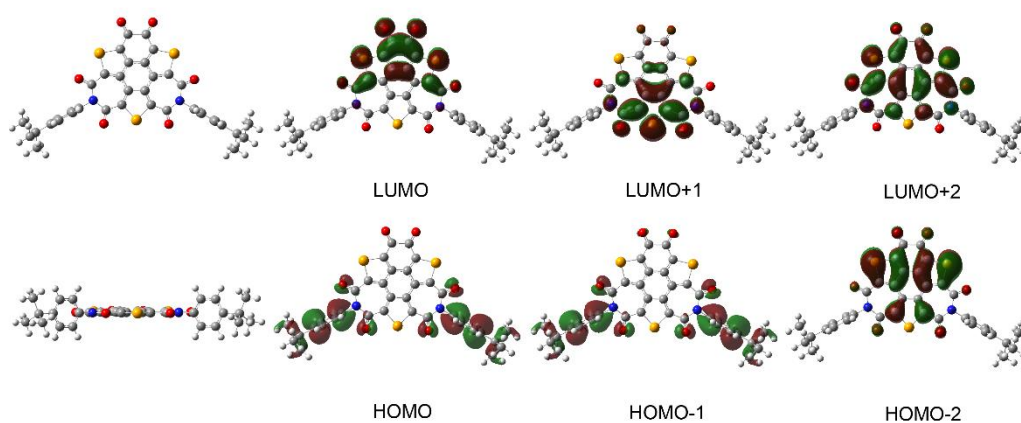

**Figure S30.** Calculated molecular orbitals of compound **10**.

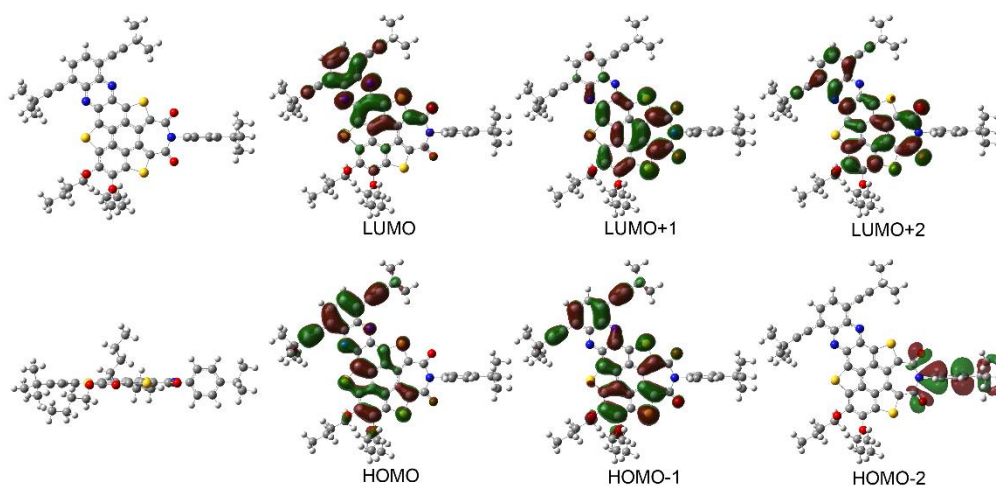

**Figure S31.** Calculated molecular orbitals of compound **16**.

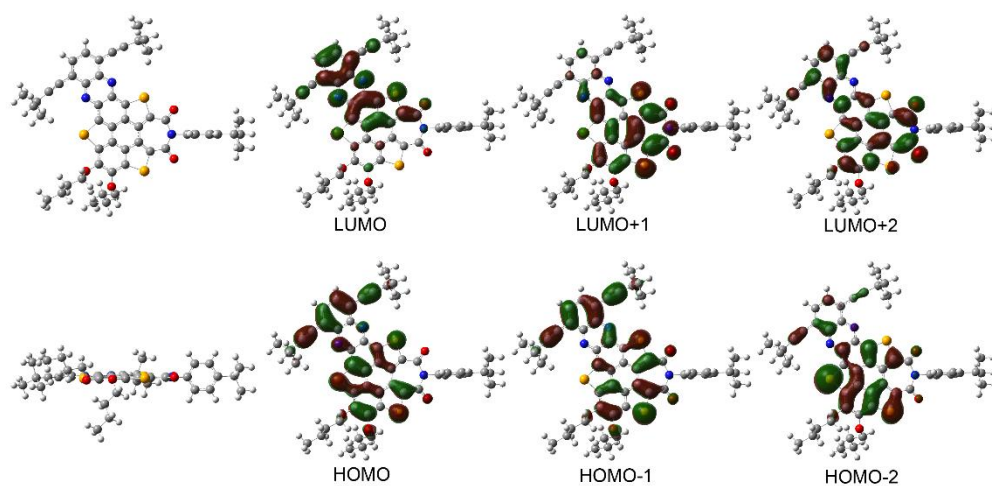

**Figure S32.** Calculated molecular orbitals of compound **17**.

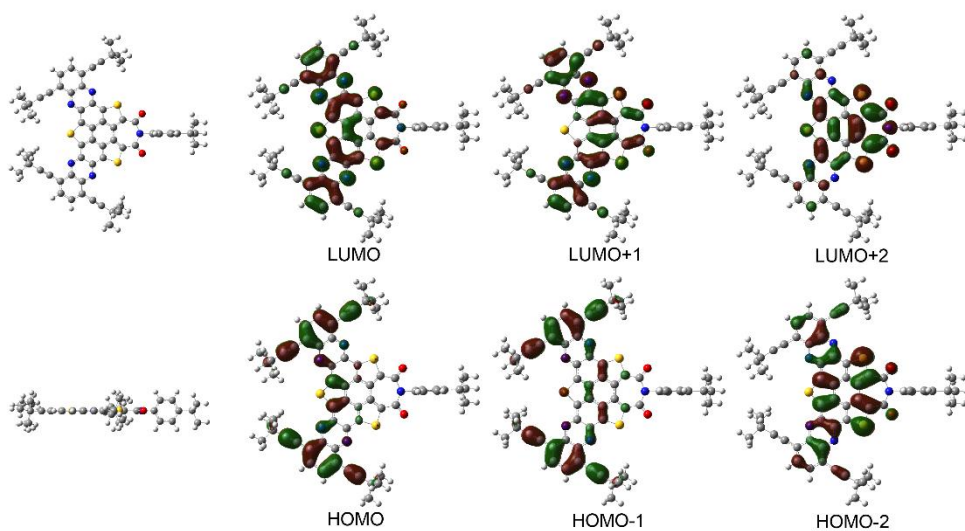

**Figure S33.** Calculated molecular orbitals of compound **18**.

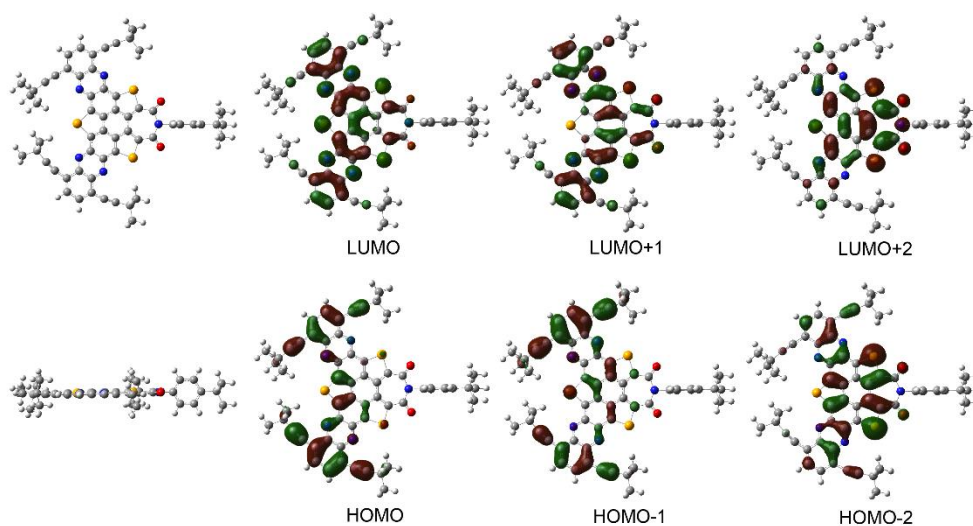

**Figure S34.** Calculated molecular orbitals of compound **19**.

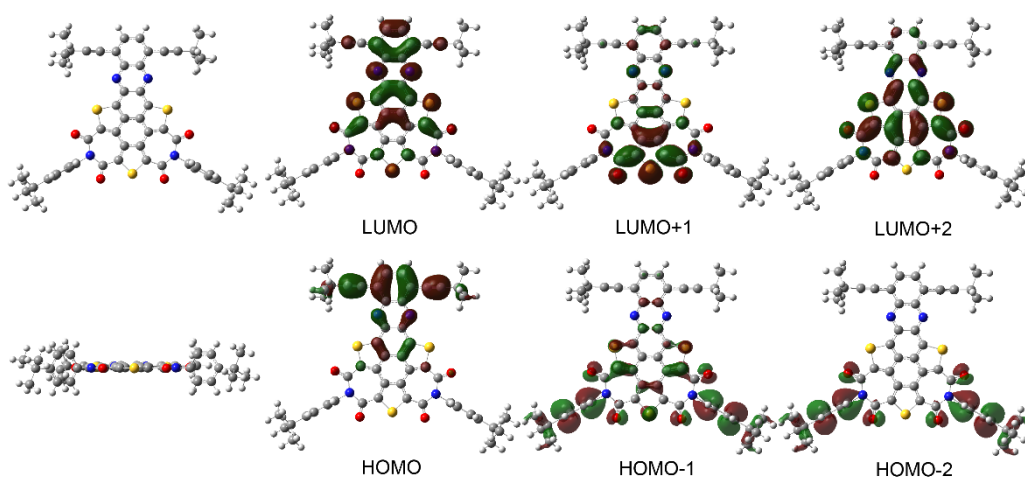

**Figure S35.** Calculated molecular orbitals of compound **20**.

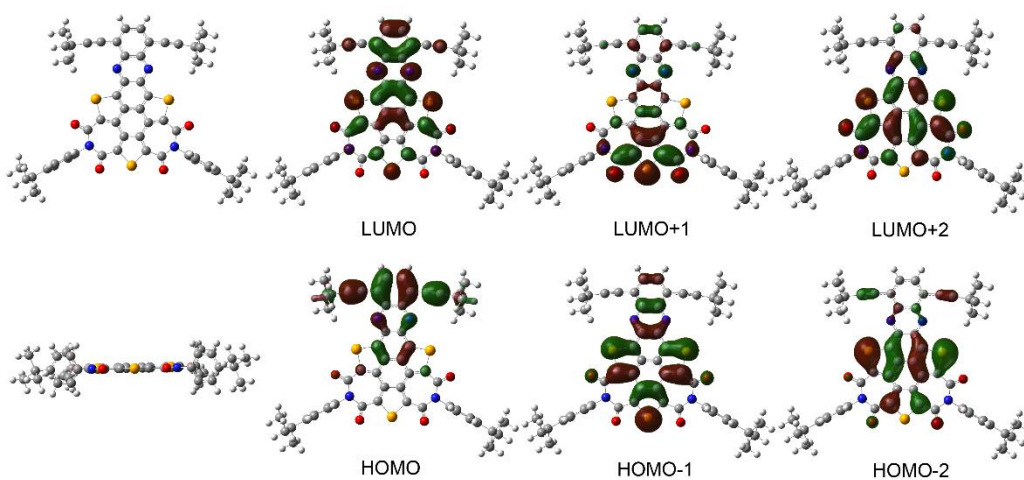

**Figure S36.** Calculated molecular orbitals of compound **21**.

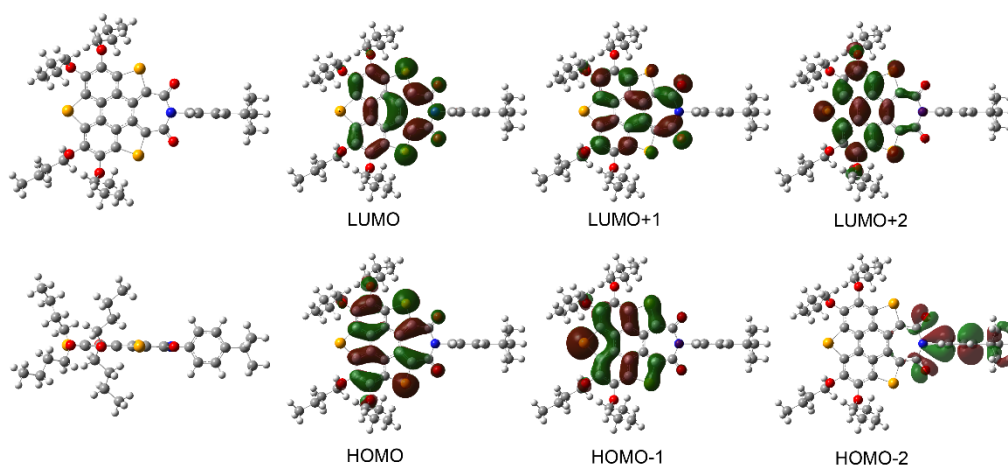

**Figure S37.** Calculated molecular orbitals of compound 22.

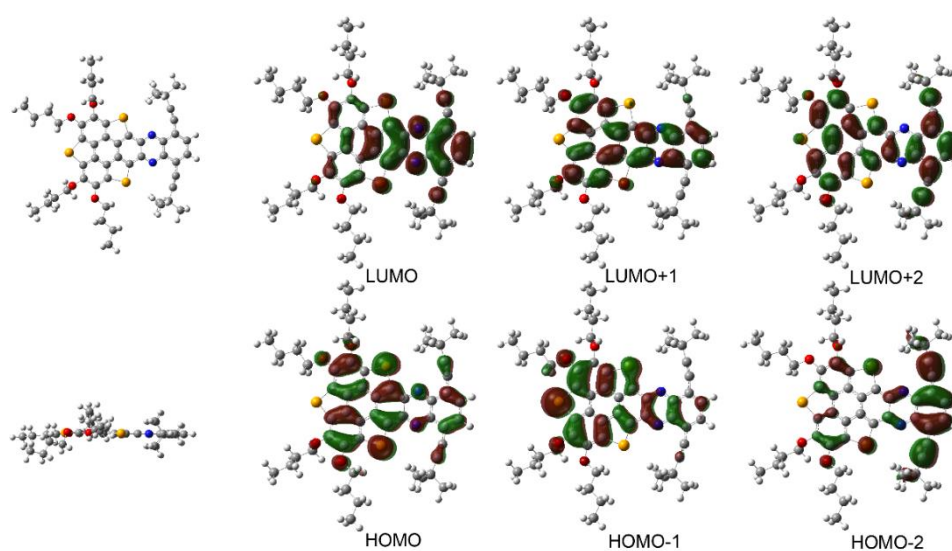

**Figure S38.** Calculated molecular orbitals of compound 23.

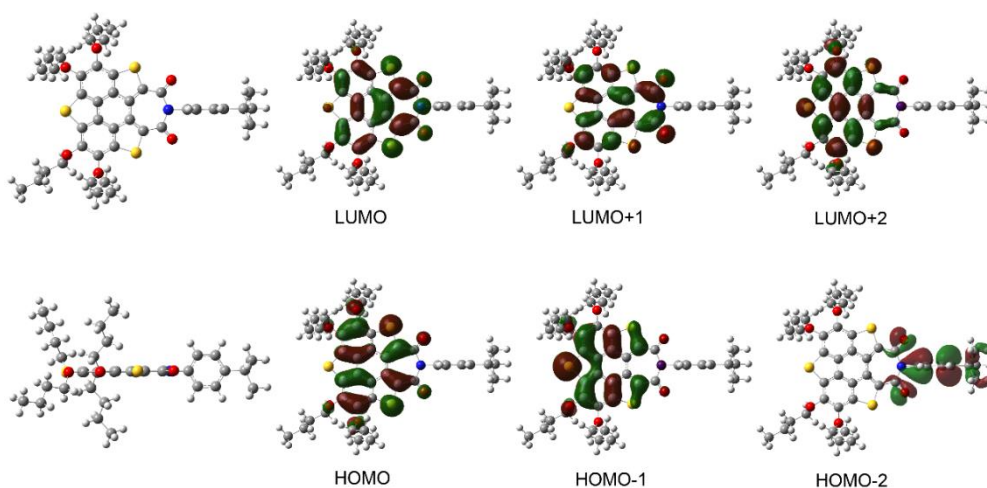

**Figure S39.** Calculated molecular orbitals of compound 24.



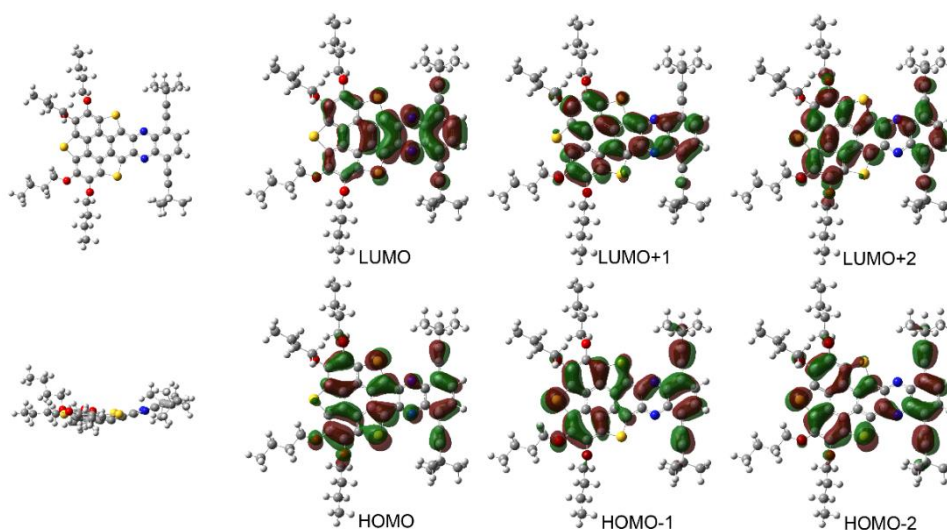

**Figure S40.** Calculated molecular orbitals of compound **25**.

## 7.2 UV-Vis Absorption Spectra Calculation

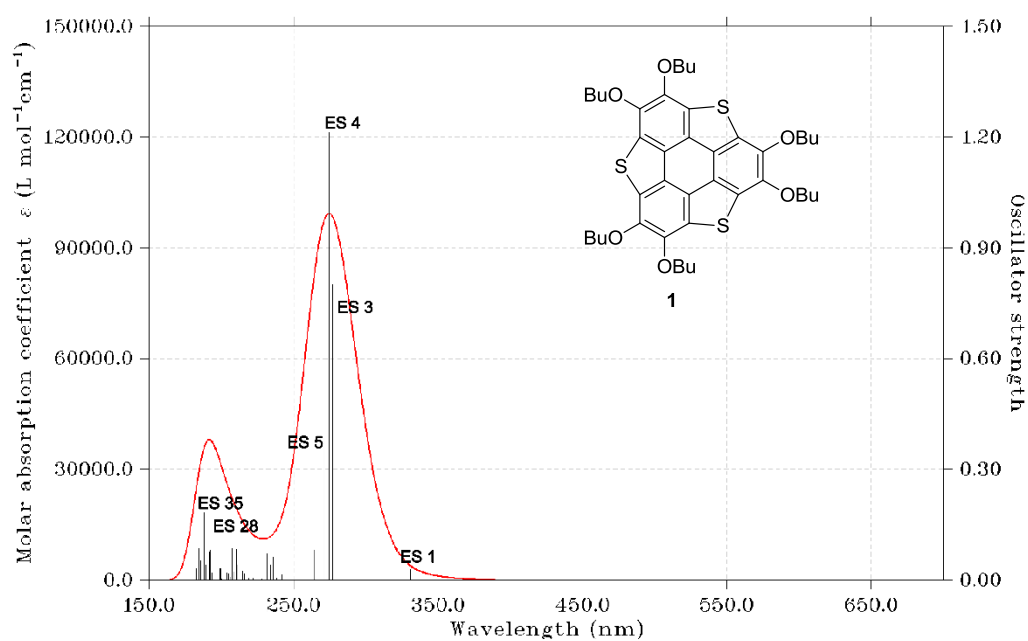

**Figure S41.** Calculated UV-Vis absorption spectra and corresponding excitation states (ESs) of **1**.

**Table S6.** Calculated excitation energy, excitation wavelength, oscillator strength, transition type and corresponding contribution of each excited state (ES) of **1**.

| Excited State (ES) | Excitation Energy /eV | Excitation Wavelength / nm | Oscillator Strength | Transition Type      | Contribution  |
|--------------------|-----------------------|----------------------------|---------------------|----------------------|---------------|
| 1                  | 3.7485                | 330.75                     | 0.0285              | HOMO-2→LUMO+2        | 2.39%         |
|                    |                       |                            |                     | <b>HOMO-1→LUMO+1</b> | <b>30.35%</b> |
|                    |                       |                            |                     | <b>HOMO→LUMO</b>     | <b>58.56%</b> |
| 3                  | 4.4802                | 276.74                     | 0.7996              | <b>HOMO-1→LUMO</b>   | <b>20.54%</b> |
|                    |                       |                            |                     | <b>HOMO-1→LUMO+1</b> | <b>19.63%</b> |
|                    |                       |                            |                     | <b>HOMO→LUMO</b>     | <b>11.13%</b> |
|                    |                       |                            |                     | <b>HOMO→LUMO+1</b>   | <b>18.06%</b> |
|                    |                       |                            |                     | <b>HOMO→LUMO+2</b>   | <b>17.97%</b> |
| 4                  | 4.5198                | 274.31                     | 1.2134              | <b>HOMO-1→LUMO</b>   | <b>23.97%</b> |
|                    |                       |                            |                     | <b>HOMO-1→LUMO+1</b> | <b>33.07%</b> |
|                    |                       |                            |                     | <b>HOMO→LUMO</b>     | <b>16.87%</b> |
|                    |                       |                            |                     | <b>HOMO→LUMO+1</b>   | <b>19.38%</b> |
| 5                  | 4.5700                | 271.30                     | 0.3840              | HOMO-3→LUMO+1        | 2.63%         |
|                    |                       |                            |                     | HOMO-2→LUMO          | 6.62%         |
|                    |                       |                            |                     | HOMO-1→LUMO          | 6.22%         |
|                    |                       |                            |                     | HOMO-1→LUMO+1        | 7.85%         |
|                    |                       |                            |                     | HOMO→LUMO            | 4.28%         |
|                    |                       |                            |                     | HOMO→LUMO+1          | 5.00%         |
|                    |                       |                            |                     | <b>HOMO→LUMO+2</b>   | <b>53.96%</b> |
| 28                 | 6.2986                | 196.84                     | 0.167               | HOMO-11→LUMO         | 2.20%         |
|                    |                       |                            |                     | HOMO-5→LUMO+1        | 4.29%         |
|                    |                       |                            |                     | HOMO-4→LUMO+2        | 8.42%         |
|                    |                       |                            |                     | <b>HOMO-3→LUMO+2</b> | <b>21.94%</b> |
|                    |                       |                            |                     | HOMO-2→LUMO+2        | 7.79%         |
|                    |                       |                            |                     | HOMO-1→LUMO+4        | 2.88%         |
|                    |                       |                            |                     | <b>HOMO→LUMO+8</b>   | <b>14.31%</b> |
|                    |                       |                            |                     | HOMO→LUMO+9          | 2.63%         |
|                    |                       |                            |                     | HOMO→LUMO+10         | 4.24%         |
| 35                 | 6.5918                | 188.09                     | 0.1821              | HOMO-8→LUMO          | 7.73%         |
|                    |                       |                            |                     | HOMO-8→LUMO+2        | 2.03%         |
|                    |                       |                            |                     | HOMO-5→LUMO          | 2.32%         |
|                    |                       |                            |                     | HOMO-3→LUMO+7        | 2.13%         |
|                    |                       |                            |                     | HOMO-2→LUMO+2        | 5.24%         |
|                    |                       |                            |                     | HOMO-2→LUMO+4        | 3.18%         |
|                    |                       |                            |                     | HOMO-1→LUMO+4        | 2.54%         |
|                    |                       |                            |                     | <b>HOMO-1→LUMO+8</b> | <b>11.43%</b> |
|                    |                       |                            |                     | <b>HOMO-1→LUMO+9</b> | <b>16.98%</b> |
|                    |                       |                            |                     | HOMO→LUMO+9          | 2.74%         |
|                    |                       |                            |                     | HOMO→LUMO+10         | 2.26%         |
|                    |                       |                            |                     | <b>HOMO→LUMO+11</b>  | <b>14.32%</b> |

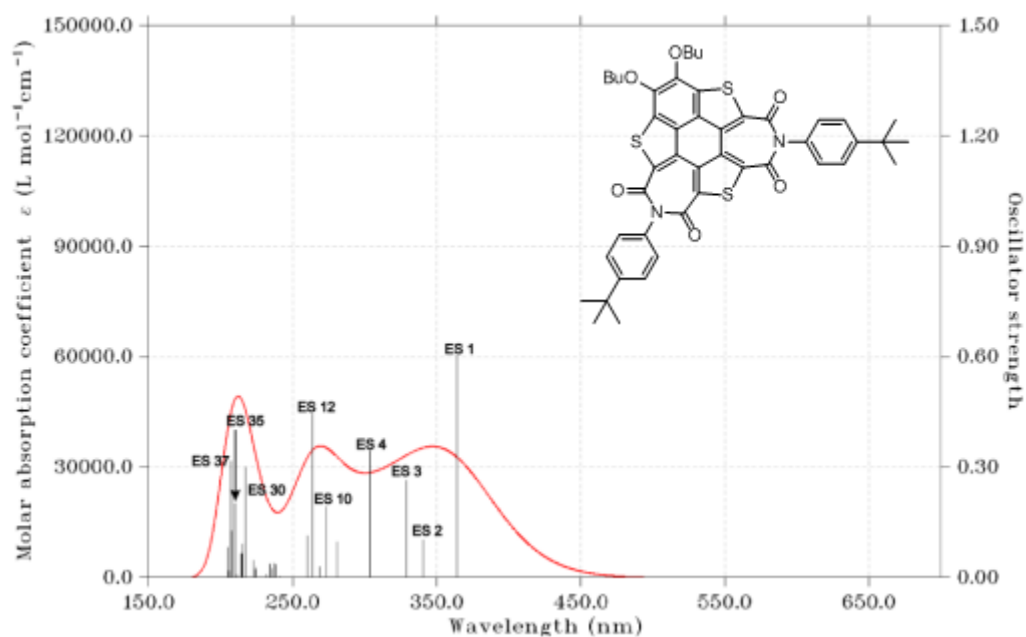

**Figure S42.** Calculated UV-Vis absorption spectra and corresponding excitation states (ESs) of **7**.

**Table S7.** Calculated excitation energy, excitation wavelength, oscillator strength, transition type and corresponding contribution of each excited state (ES) of **7**.

| Excited State (ES) | Excitation Energy /eV | Excitation Wavelength / nm | Oscillator Strength | Transition Type      | Contribution  |
|--------------------|-----------------------|----------------------------|---------------------|----------------------|---------------|
| 1                  | 3.4087                | 363.73                     | 0.6009              | HOMO-1→LUMO+1        | 2.05%         |
|                    |                       |                            |                     | <b>HOMO→LUMO</b>     | <b>91.87%</b> |
| 2                  | 3.6437                | 340.27                     | 0.1025              | HOMO-7→LUMO+1        | 7.20%         |
|                    |                       |                            |                     | <b>HOMO→LUMO+1</b>   | <b>88.08%</b> |
| 3                  | 3.7734                | 328.58                     | 0.2630              | <b>HOMO-1→LUMO</b>   | <b>89.28%</b> |
|                    |                       |                            |                     | HOMO→LUMO+2          | 4.00%         |
|                    |                       |                            |                     | HOMO→LUMO+4          | 2.32%         |
| 4                  | 4.0818                | 303.75                     | 0.3446              | HOMO-7→LUMO          | 7.47%         |
|                    |                       |                            |                     | <b>HOMO-6→LUMO+1</b> | <b>15.74%</b> |
|                    |                       |                            |                     | HOMO-4→LUMO          | 5.69%         |
|                    |                       |                            |                     | <b>HOMO1→LUMO+2</b>  | <b>58.48%</b> |
| 10                 | 4.537                 | 273.27                     | 0.1922              | HOMO-13→LUMO         | 3.39%         |
|                    |                       |                            |                     | <b>HOMO-7→LUMO</b>   | <b>63.84%</b> |
|                    |                       |                            |                     | HOMO-6→LUMO+1        | 9.61%         |
|                    |                       |                            |                     | HOMO-4→LUMO+1        | 4.91%         |
| 12                 | 4.7044                | 263.55                     | 0.443               | HOMO-7→LUMO          | 2.40%         |
|                    |                       |                            |                     | <b>HOMO-7→LUMO+1</b> | <b>42.37%</b> |
|                    |                       |                            |                     | HOMO-6→LUMO          | 5.21%         |

|    |        |        |        |                       |                |
|----|--------|--------|--------|-----------------------|----------------|
|    |        |        |        | HOMO-4→LUMO           | 2.49%          |
|    |        |        |        | HOMO-1→LUMO           | 3.19%          |
|    |        |        |        | HOMO→LUMO+1           | 3.02%          |
|    |        |        |        | <b>HOMO→LUMO+2</b>    | <b>25.51%</b>  |
|    |        |        |        | HOMO→LUMO+4           | 3.48%          |
| 30 | 5.7106 | 217.11 | 0.2984 | HOMO-19→LUMO          | 3.18%          |
|    |        |        |        | <b>HOMO-13→LUMO+1</b> | <b>22.74%</b>  |
|    |        |        |        | <b>HOMO-6→LUMO+2</b>  | <b>26.44%</b>  |
|    |        |        |        | HOMO-5→LUMO           | 2.67%          |
|    |        |        |        | HOMO-4→LUMO+2         | 3.43%          |
|    |        |        |        | HOMO-1→LUMO+2         | 4.99%          |
|    |        |        |        | <b>HOMO→LUMO+9</b>    | <b>13.90%</b>  |
| 35 | 5.9104 | 209.77 | 0.202  | HOMO-17→LUMO          | 4.66%          |
|    |        |        |        | <b>HOMO-15→LUMO</b>   | <b>45.72%</b>  |
|    |        |        |        | HOMO-14→LUMO          | 2.84%          |
|    |        |        |        | HOMO-13→LUMO          | 7.19%          |
|    |        |        |        | HOMO-7→LUMO+2         | 3.88%          |
|    |        |        |        | HOMO-6→LUMO+3         | 5.21%          |
|    |        |        |        | HOMO-1→LUMO+3         | 9.56%          |
| 37 | 5.9999 | 206.65 | 0.3159 | HOMO-19→LUMO          | 2.19%          |
|    |        |        |        | HOMO-19→LUMO+1        | 3.00%          |
|    |        |        |        | HOMO-17→LUMO+1        | 2.71%          |
|    |        |        |        | HOMO12→LUMO+1         | <b>15.798%</b> |
|    |        |        |        | HOMO-12→LUMO+2        | 5.75%          |
|    |        |        |        | HOMO-11→LUMO          | 15.79%         |
|    |        |        |        | HOMO-7→LUMO+2         | 6.87%          |
|    |        |        |        | HOMO-1→LUMO+3         | 17.77%         |
|    |        |        |        | HOMO→LUMO+4           | 4.06%          |



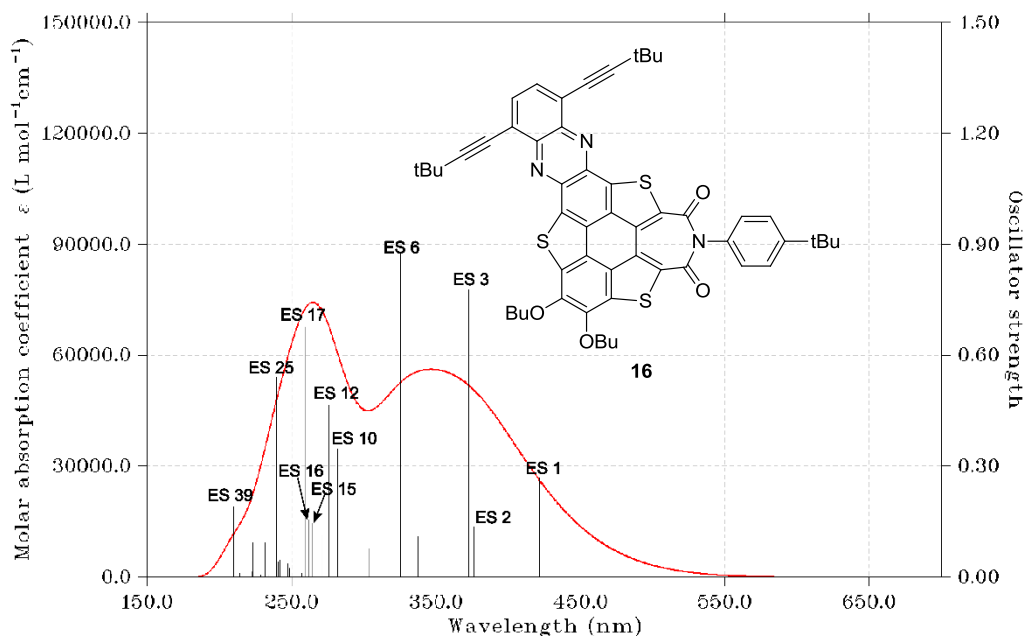

**Figure S43.** Calculated UV-Vis absorption spectra and corresponding excitation states (ESs) of **16**.

**Table S8.** Calculated excitation energy, excitation wavelength, oscillator strength, transition type and corresponding contribution of each excited state (ES) of **16**.

| Excited State (ES) | Excitation Energy / eV | Excitation Wavelength / nm | Oscillator Strength | Transition Type      | Contribution  |
|--------------------|------------------------|----------------------------|---------------------|----------------------|---------------|
| 1                  | 2.9432                 | 421.35                     | 0.2686              | <b>HOMO-1→LUMO</b>   | <b>14.40%</b> |
|                    |                        |                            |                     | <b>HOMO→LUMO</b>     | <b>77.63%</b> |
| 2                  | 3.2945                 | 376.33                     | 0.1367              | HOMO-2→LUMO          | 2.43%         |
|                    |                        |                            |                     | HOMO-1→LUMO          | 5.78%         |
|                    |                        |                            |                     | <b>HOMO-1→LUMO+1</b> | <b>17.31%</b> |
|                    |                        |                            |                     | HOMO→LUMO            | 4.38%         |
|                    |                        |                            |                     | <b>HOMO→LUMO+1</b>   | <b>59.59%</b> |
| 6                  | 3.8092                 | 325.49                     | 0.8741              | HOMO-5→LUMO          | 4.77%         |
|                    |                        |                            |                     | <b>HOMO-2→LUMO</b>   | <b>13.19%</b> |
|                    |                        |                            |                     | <b>HOMO-2→LUMO+1</b> | <b>39.18%</b> |
|                    |                        |                            |                     | <b>HOMO-1→LUMO+1</b> | <b>15.64%</b> |
|                    |                        |                            |                     | HOMO→LUMO+1          | 9.75%         |
| 10                 | 4.4027                 | 281.61                     | 0.3469              | HOMO→LUMO+2          | 2.35%         |
|                    |                        |                            |                     | HOMO-9→LUMO          | 9.52%         |
|                    |                        |                            |                     | HOMO-9→LUMO+1        | 3.77%         |
|                    |                        |                            |                     | <b>HOMO-6→LUMO+1</b> | <b>31.86%</b> |
|                    |                        |                            |                     | HOMO-5→LUMO          | 4.15%         |
|                    |                        |                            |                     | <b>HOMO-5→LUMO+1</b> | <b>12.80%</b> |
| HOMO-1→LUMO+2      | 7.45%                  |                            |                     |                      |               |
|                    |                        |                            |                     | HOMO→LUMO+2          | 9.38%         |

|                    |               |        |        |                      |               |
|--------------------|---------------|--------|--------|----------------------|---------------|
|                    |               |        |        | HOMO→LUMO+4          | 3.11%         |
| 12                 | 4.5016        | 275.42 | 0.4646 | HOMO-9→LUMO+1        | 8.01%         |
|                    |               |        |        | HOMO-6→LUMO          | 2.06%         |
|                    |               |        |        | <b>HOMO-6→LUMO+1</b> | <b>11.78%</b> |
|                    |               |        |        | HOMO-5→LUMO          | 3.28%         |
|                    |               |        |        | HOMO-2→LUMO          | 2.18%         |
|                    |               |        |        | HOMO-2→LUMO+1        | 2.65%         |
|                    |               |        |        | <b>HOMO-1→LUMO+2</b> | <b>16.35%</b> |
|                    |               |        |        | HOMO-1→LUMO+3        | 2.61%         |
|                    |               |        |        | <b>HOMO→LUMO+2</b>   | <b>28.32%</b> |
|                    |               |        |        | HOMO→LUMO+3          | 5.11%         |
| 15                 | 4.6906        | 264.33 | 0.1444 | HOMO-6→LUMO+1        | 4.00%         |
|                    |               |        |        | <b>HOMO-5→LUMO</b>   | <b>28.09%</b> |
|                    |               |        |        | HOMO-5→LUMO+1        | 3.94%         |
|                    |               |        |        | HOMO-4→LUMO          | 7.65%         |
|                    |               |        |        | HOMO-4→LUMO+1        | 3.02%         |
|                    |               |        |        | HOMO-2→LUMO          | 8.45%         |
|                    |               |        |        | HOMO-2→LUMO+1        | 3.17%         |
|                    |               |        |        | HOMO-2→LUMO+3        | 6.24%         |
|                    |               |        |        | HOMO-1→LUMO+3        | 6.82%         |
|                    |               |        |        | HOMO→LUMO+2          | 7.53%         |
| HOMO→LUMO+5        | 3.18%         |        |        |                      |               |
| 16                 | 4.7424        | 261.44 | 0.1549 | <b>HOMO-11→LUMO</b>  | <b>12.31%</b> |
|                    |               |        |        | <b>HOMO-9→LUMO</b>   | <b>12.04%</b> |
|                    |               |        |        | <b>HOMO-6→LUMO</b>   | <b>14.31%</b> |
|                    |               |        |        | HOMO-6→LUMO+1        | 6.44%         |
|                    |               |        |        | HOMO-5→LUMO+1        | 2.30%         |
|                    |               |        |        | HOMO-2→LUMO          | 2.19%         |
|                    |               |        |        | HOMO-2→LUMO+2        | 2.53%         |
|                    |               |        |        | HOMO-1→LUMO          | 3.10%         |
|                    |               |        |        | HOMO-1→LUMO+1        | 7.05%         |
|                    |               |        |        | HOMO→LUMO+1          | 6.00%         |
| <b>HOMO→LUMO+3</b> | <b>11.18%</b> |        |        |                      |               |
| 17                 | 4.7754        | 259.63 | 0.6757 | HOMO-11→LUMO         | 2.02%         |
|                    |               |        |        | HOMO-9→LUMO          | 2.61%         |
|                    |               |        |        | HOMO-5→LUMO          | 6.65%         |
|                    |               |        |        | HOMO-2→LUMO+1        | 2.01%         |
|                    |               |        |        | HOMO-1→LUMO+2        | 6.14%         |
|                    |               |        |        | <b>HOMO-1→LUMO+3</b> | <b>11.28%</b> |
|                    |               |        |        | HOMO-1→LUMO+4        | 5.88%         |
|                    |               |        |        | HOMO-1→LUMO+5        | 3.29%         |
|                    |               |        |        | HOMO→LUMO+2          | 3.96%         |
|                    |               |        |        | <b>HOMO→LUMO+3</b>   | <b>31.75%</b> |
| HOMO→LUMO+4        | 8.36%         |        |        |                      |               |

|              |        |        |        |                       |               |
|--------------|--------|--------|--------|-----------------------|---------------|
| 25           | 5.1747 | 239.6  | 0.5404 | <b>HOMO-9→LUMO</b>    | <b>20.26%</b> |
|              |        |        |        | HOMO-5→LUMO           | 3.84%         |
|              |        |        |        | HOMO-5→LUMO+1         | 3.09%         |
|              |        |        |        | HOMO-4→LUMO+1         | 2.91%         |
|              |        |        |        | HOMO-2→LUMO+2         | 6.11%         |
|              |        |        |        | HOMO-2→LUMO+3         | 2.27%         |
|              |        |        |        | <b>HOMO-1→LUMO+2</b>  | <b>12.74%</b> |
|              |        |        |        | <b>HOMO→LUMO+3</b>    | <b>11.39%</b> |
|              |        |        |        | <b>HOMO→LUMO+4</b>    | <b>15.57%</b> |
| 39           | 5.9101 | 209.78 | 0.1894 | HOMO-19→LUMO          | 3.85%         |
|              |        |        |        | <b>HOMO-15→LUMO+1</b> | <b>25.36%</b> |
|              |        |        |        | HOMO-14→LUMO          | 6.20%         |
|              |        |        |        | HOMO-14→LUMO+2        | 4.79%         |
|              |        |        |        | HOMO-5→LUMO+3         | 3.49%         |
|              |        |        |        | HOMO-2→LUMO+2         | 3.84%         |
|              |        |        |        | HOMO-2→LUMO+7         | 3.34%         |
|              |        |        |        | HOMO-1→LUMO+3         | 3.43%         |
|              |        |        |        | HOMO-1→LUMO+5         | 3.84%         |
|              |        |        |        | HOMO→LUMO+9           | 2.44%         |
| HOMO→LUMO+10 | 4.27%  |        |        |                       |               |

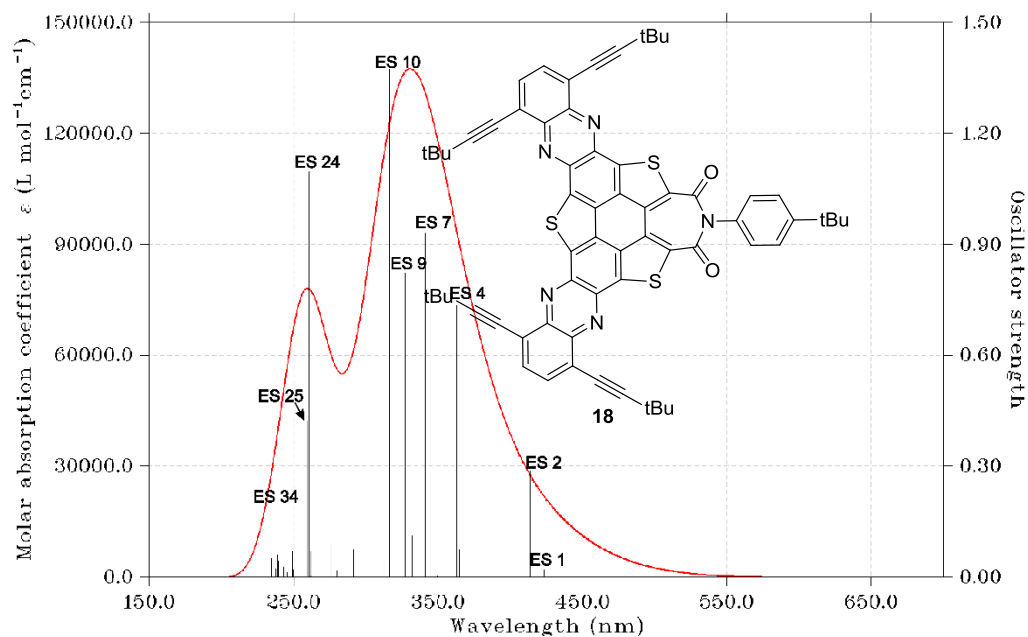

**Figure S44.** Calculated UV-Vis absorption spectra and corresponding excitation states (ESs) of **18**.

**Table S9.** Calculated excitation energy, excitation wavelength, oscillator strength, transition type and corresponding contribution of each excited state (ES) of **18**.

| Excited State (ES) | Excitation Energy /eV | Excitation Wavelength / nm | Oscillator Strength | Transition Type | Contribution |
|--------------------|-----------------------|----------------------------|---------------------|-----------------|--------------|
| 1                  | 2.9289                | 423.31                     | 0.0195              | HOMO-1→LUMO+1   | 31.97%       |
|                    |                       |                            |                     | HOMO→LUMO       | 60.19%       |
| 2                  | 2.9982                | 413.52                     | 0.2871              | HOMO-2→LUMO+1   | 2.26%        |
|                    |                       |                            |                     | HOMO-1→LUMO     | 53.66%       |
|                    |                       |                            |                     | HOMO→LUMO+1     | 38.21%       |
| 4                  | 3.4166                | 362.89                     | 0.7348              | HOMO-16→LUMO+1  | 4.01%        |
|                    |                       |                            |                     | HOMO-12→LUMO+1  | 5.06%        |
|                    |                       |                            |                     | HOMO-2→LUMO     | 68.25%       |
|                    |                       |                            |                     | HOMO-1→LUMO+1   | 6.33%        |
|                    |                       |                            |                     | HOMO→LUMO       | 4.51%        |
| 7                  | 3.6353                | 341.05                     | 0.9290              | HOMO-6→LUMO     | 5.02%        |
|                    |                       |                            |                     | HOMO-5→LUMO     | 2.94%        |
|                    |                       |                            |                     | HOMO-3→LUMO+1   | 6.29%        |
|                    |                       |                            |                     | HOMO-2→LUMO+2   | 42.83%       |
|                    |                       |                            |                     | HOMO-1→LUMO+1   | 3.11%        |
|                    |                       |                            |                     | HOMO→LUMO+2     | 28.48%       |
|                    |                       |                            |                     | HOMO→LUMO+4     | 2.13%        |
| 9                  | 3.7893                | 327.19                     | 0.8219              | HOMO-6→LUMO     | 6.43%        |

|    |        |        |        |                      |               |
|----|--------|--------|--------|----------------------|---------------|
|    |        |        |        | HOMO-6→LUMO+2        | 3.97%         |
|    |        |        |        | HOMO-5→LUMO          | 3.58%         |
|    |        |        |        | HOMO-5→LUMO+2        | 2.30%         |
|    |        |        |        | <b>HOMO-3→LUMO+1</b> | <b>41.78%</b> |
|    |        |        |        | HOMO-1→LUMO+1        | 7.01%         |
|    |        |        |        | HOMO-1→LUMO+3        | 4.41%         |
|    |        |        |        | <b>HOMO→LUMO+2</b>   | <b>19.06%</b> |
| 10 | 3.2900 | 316.29 | 1.3745 | <b>HOMO-3→LUMO+2</b> | <b>29.90%</b> |
|    |        |        |        | <b>HOMO-2→LUMO+1</b> | <b>23.15%</b> |
|    |        |        |        | <b>HOMO-1→LUMO+2</b> | <b>34.14%</b> |
| 24 | 4.7577 | 260.60 | 1.0976 | HOMO-3→LUMO          | 2.34%         |
|    |        |        |        | HOMO-2→LUMO+6        | 2.27%         |
|    |        |        |        | <b>HOMO-1→LUMO+4</b> | <b>23.78%</b> |
|    |        |        |        | <b>HOMO-1→LUMO+5</b> | <b>10.87%</b> |
|    |        |        |        | <b>HOMO→LUMO+3</b>   | <b>24.43%</b> |
|    |        |        |        | <b>HOMO→LUMO+6</b>   | <b>18.63%</b> |
| 25 | 4.7750 | 259.65 | 0.4218 | HOMO-16→LUMO+1       | 4.06%         |
|    |        |        |        | HOMO-13→LUMO         | 6.22%         |
|    |        |        |        | HOMO-11→LUMO         | 3.32%         |
|    |        |        |        | HOMO-6→LUMO          | 2.90%         |
|    |        |        |        | HOMO-2→LUMO+4        | 3.56%         |
|    |        |        |        | <b>HOMO-1→LUMO+3</b> | <b>14.80%</b> |
|    |        |        |        | <b>HOMO-1→LUMO+6</b> | <b>14.80%</b> |
|    |        |        |        | <b>HOMO→LUMO+4</b>   | <b>17.00%</b> |
|    |        |        |        | <b>HOMO→LUMO+5</b>   | <b>11.61%</b> |
| 34 | 5.1425 | 241.10 | 0.1966 | HOMO-16→LUMO+1       | 2.56%         |
|    |        |        |        | HOMO-11→LUMO         | 7.91%         |
|    |        |        |        | HOMO-11→LUMO+2       | 2.29%         |
|    |        |        |        | HOMO-6→LUMO          | 7.99%         |
|    |        |        |        | <b>HOMO-6→LUMO+2</b> | <b>15.08%</b> |
|    |        |        |        | HOMO-5→LUMO+2        | 3.00%         |
|    |        |        |        | HOMO-3→LUMO+1        | 5.49%         |
|    |        |        |        | HOMO-2→LUMO          | 4.51%         |
|    |        |        |        | HOMO-2→LUMO+4        | 2.19%         |
|    |        |        |        | <b>HOMO-1→LUMO+1</b> | <b>10.73%</b> |
|    |        |        |        | HOMO-1→LUMO+3        | 2.12%         |
|    |        |        |        | HOMO-1→LUMO+7        | 2.92%         |
|    |        |        |        | HOMO→LUMO            | 6.29%         |
|    |        |        |        | HOMO→LUMO+4          | 8.50%         |
|    |        |        |        | HOMO→LUMO+5          | 2.28%         |

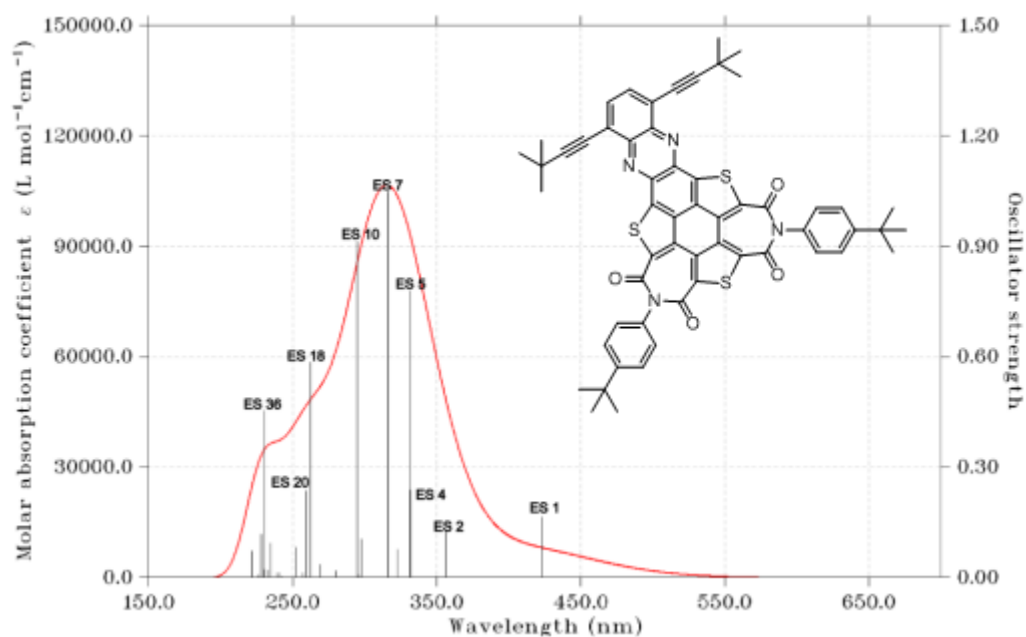

**Figure S45.** Calculated UV-Vis absorption spectra and corresponding excitation states (**ESs**) of **20**.

**Table S10.** Calculated excitation energy, excitation wavelength, oscillator strength, transition type and corresponding contribution of each excited state (**ES**) of **20**.

| Excited State ( <b>ES</b> ) | Excitation Energy / eV | Excitation Wavelength / nm | Oscillator Strength | Transition Type               | Contribution  |
|-----------------------------|------------------------|----------------------------|---------------------|-------------------------------|---------------|
| 1                           | 2.932                  | 422.86                     | 0.1643              | <b>HOMO</b> → <b>LUMO</b>     | <b>90.43%</b> |
|                             |                        |                            |                     | HOMO→LUMO+2                   | 3.61%         |
| 2                           | 3.6437                 | 340.27                     | 0.1025              | HOMO-11→LUMO                  | 5.09%         |
|                             |                        |                            |                     | HOMO-10→LUMO                  | 5.09%         |
|                             |                        |                            |                     | HOMO-2→LUMO+1                 | 9.17%         |
|                             |                        |                            |                     | <b>HOMO-1</b> → <b>LUMO</b>   | <b>60.89%</b> |
|                             |                        |                            |                     | HOMO-1→LUMO+2                 | 2.20%         |
|                             |                        |                            |                     | <b>HOMO</b> → <b>LUMO+1</b>   | <b>10.47%</b> |
| 4                           | 3.7404                 | 331.47                     | 0.2372              | HOMO-7→LUMO                   | 9.71%         |
|                             |                        |                            |                     | HOMO-5→LUMO                   | 5.58%         |
|                             |                        |                            |                     | <b>HOMO-2</b> → <b>LUMO</b>   | <b>33.70%</b> |
|                             |                        |                            |                     | HOMO-2→LUMO+2                 | 5.71%         |
|                             |                        |                            |                     | <b>HOMO-1</b> → <b>LUMO+1</b> | <b>34.43%</b> |
| 5                           | 3.7464                 | 330.95                     | 0.778               | HOMO-7→LUMO+1                 | 3.31%         |
|                             |                        |                            |                     | HOMO-2→LUMO+1                 | 16.33%        |
|                             |                        |                            |                     | HOMO-1→LUMO                   | 21.26%        |
|                             |                        |                            |                     | HOMO-1→LUMO                   | 8.09%         |
|                             |                        |                            |                     | HOMO→LUMO+1                   | 39.95%        |

|                    |               |        |        |                      |               |
|--------------------|---------------|--------|--------|----------------------|---------------|
| 7                  | 3.927         | 315.72 | 1.0479 | HOMO-11→LUMO         | 2.66%         |
|                    |               |        |        | HOMO-11→LUMO+2       | 5.65%         |
|                    |               |        |        | HOMO10→LUMO+2        | 4.52%         |
|                    |               |        |        | HOMO-2→LUMO+1        | 2.33%         |
|                    |               |        |        | <b>HOMO-1→LUMO+2</b> | <b>71.56%</b> |
|                    |               |        |        | HOMO→LUMO+1          | 8.19%         |
| 10                 | 4.2068        | 294.72 | 0.9115 | HOMO-7→LUMO+2        | 8.03%         |
|                    |               |        |        | HOMO-5→LUMO+2        | 3.96%         |
|                    |               |        |        | <b>HOMO-2→LUMO+2</b> | <b>47.97%</b> |
|                    |               |        |        | <b>HOMO-1→LUMO+1</b> | <b>24.29%</b> |
| 18                 | 4.728         | 262.24 | 0.5843 | HOMO→LUMO+2          | 7.87%         |
|                    |               |        |        | HOMO-17→LUMO         | 3.57%         |
|                    |               |        |        | <b>HOMO-7→LUMO</b>   | <b>17.77%</b> |
|                    |               |        |        | HOMO-5→LUMO          | 8.31%         |
|                    |               |        |        | HOMO-2→LUMO          | 5.57%         |
|                    |               |        |        | HOMO-2→LUMO+3        | 3.63%         |
|                    |               |        |        | HOMO-1→LUMO+1        | 3.10%         |
|                    |               |        |        | <b>HOMO→LUMO+3</b>   | <b>22.36%</b> |
| <b>HOMO→LUMO+5</b> | <b>24.19%</b> |        |        |                      |               |
| 20                 | 4.7847        | 259.13 | 0.235  | <b>HOMO-7→LUMO</b>   | <b>26.20%</b> |
|                    |               |        |        | <b>HOMO-5→LUMO</b>   | <b>14.57%</b> |
|                    |               |        |        | HOMO-1→LUMO+1        | 3.53%         |
|                    |               |        |        | <b>HOMO→LUMO+3</b>   | <b>22.8%</b>  |
|                    |               |        |        | <b>HOMO→LUMO+5</b>   | <b>16.53%</b> |
| 36                 | 5.3882        | 230.1  | 0.4525 | HOMO26→LUMO+2        | 2.58%         |
|                    |               |        |        | HOMO-15→LUMO+1       | 7.18%         |
|                    |               |        |        | HOMO-11→LUMO         | 3.97%         |
|                    |               |        |        | HOMO-11→LUMO+2       | 8.92%         |
|                    |               |        |        | HOMO-10→LUMO         | 4.68%         |
|                    |               |        |        | HOMO10→LUMO+2        | 3.86%         |
|                    |               |        |        | HOMO-5→LUMO+1        | 2.25%         |
|                    |               |        |        | HOMO-1→LUMO+3        | 8.02%         |
|                    |               |        |        | HOMO→LUMO+1          | 6.77%         |
|                    |               |        |        | <b>HOMO→LUMO+4</b>   | <b>21.84%</b> |
|                    |               |        |        | HOMO→LUMO+6          | 6.35%         |

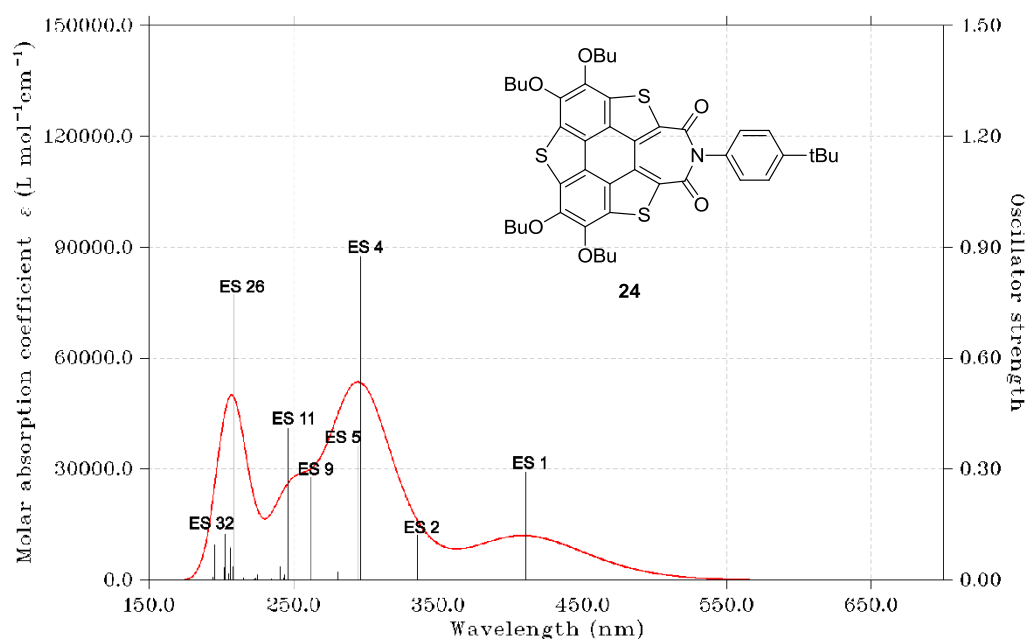

**Figure S46.** Calculated UV-Vis absorption spectra and corresponding excitation states (ESs) of **24**.

**Table S11.** Calculated excitation energy, excitation wavelength, oscillator strength, transition type and corresponding contribution of each excited state (ES) of **24**.

| Excited State(ES) | Excitation Energy /eV | Excitation Wavelength / nm | Oscillator Strength | Transition Type      | Contribution  |
|-------------------|-----------------------|----------------------------|---------------------|----------------------|---------------|
| 1                 | 3.0179                | 410.82                     | 0.2919              | <b>HOMO→LUMO</b>     | <b>96.42%</b> |
| 2                 | 3.6942                | 335.61                     | 0.1205              | HOMO-4→LUMO          | 3.57%         |
|                   |                       |                            |                     | <b>HOMO-1→LUMO</b>   | <b>74.15%</b> |
|                   |                       |                            |                     | HOMO-1→LUMO+2        | 2.60%         |
|                   |                       |                            |                     | <b>HOMO→LUMO+1</b>   | <b>12.36%</b> |
| 9                 | 4.7424                | 261.44                     | 0.2767              | HOMO-6→LUMO          | 2.41%         |
|                   |                       |                            |                     | HOMO-5→LUMO          | 8.81%         |
|                   |                       |                            |                     | HOMO-1→LUMO+1        | 3.32%         |
|                   |                       |                            |                     | <b>HOMO→LUMO+2</b>   | <b>76.47%</b> |
| 11                | 5.0351                | 246.24                     | 0.4099              | HOMO-5→LUMO+2        | 2.26%         |
|                   |                       |                            |                     | HOMO-3→LUMO          | 3.21%         |
|                   |                       |                            |                     | <b>HOMO-1→LUMO+1</b> | <b>72.85%</b> |
|                   |                       |                            |                     | HOMO-1→LUMO+5        | 2.39%         |
|                   |                       |                            |                     | HOMO→LUMO+2          | 4.25%         |
|                   |                       |                            |                     | HOMO→LUMO+3          | 6.68%         |
| 26                | 5.9547                | 208.21                     | 0.7727              | <b>HOMO-12→LUMO</b>  | <b>14.62%</b> |
|                   |                       |                            |                     | HOMO-5→LUMO+1        | 7.52%         |
|                   |                       |                            |                     | HOMO-4→LUMO+2        | 7.99%         |
|                   |                       |                            |                     | <b>HOMO-3→LUMO+1</b> | <b>11.01%</b> |



|    |        |        |        |                      |               |
|----|--------|--------|--------|----------------------|---------------|
|    |        |        |        | HOMO-2→LUMO+4        | 2.44%         |
|    |        |        |        | <b>HOMO-1→LUMO+2</b> | <b>12.52%</b> |
|    |        |        |        | <b>HOMO→LUMO+5</b>   | <b>16.58%</b> |
|    |        |        |        | HOMO→LUMO+10         | 5.01%         |
| 32 | 6.1167 | 202.70 | 0.1241 | HOMO-14→LUMO         | 4.65%         |
|    |        |        |        | <b>HOMO-13→LUMO</b>  | <b>14.60%</b> |
|    |        |        |        | <b>HOMO-12→LUMO</b>  | <b>12.00%</b> |
|    |        |        |        | HOMO-9→LUMO+1        | 5.83%         |
|    |        |        |        | <b>HOMO-6→LUMO+1</b> | <b>12.72%</b> |
|    |        |        |        | HOMO-5→LUMO+2        | 2.39%         |
|    |        |        |        | HOMO-4→LUMO+2        | 3.27%         |
|    |        |        |        | HOMO-2→LUMO+4        | 7.36%         |
|    |        |        |        | HOMO→LUMO+5          | 7.79%         |

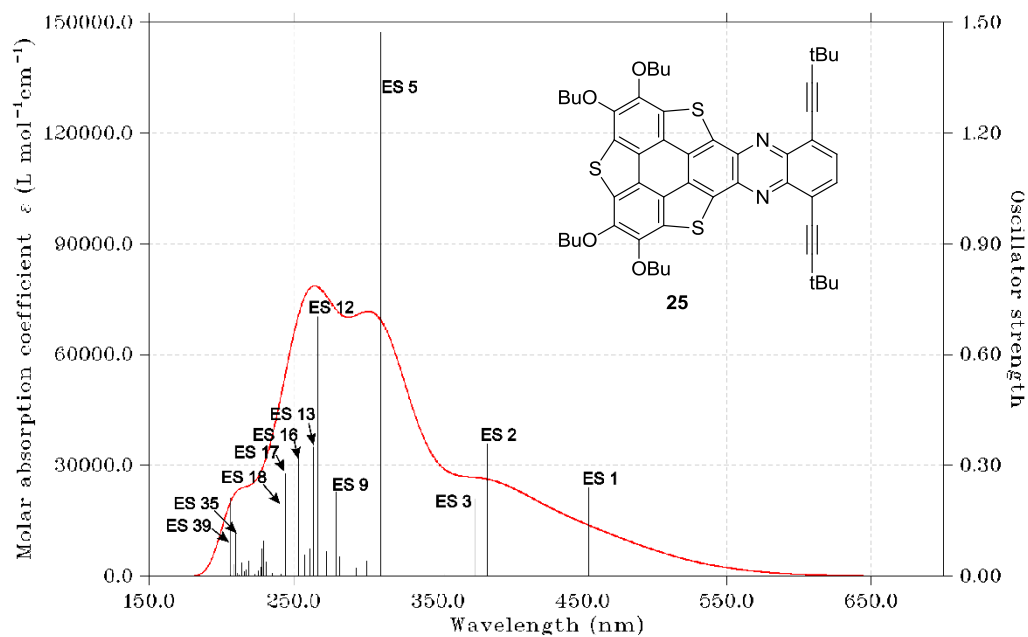

**Figure S47.** Calculated UV-Vis absorption spectra and corresponding excitation states (**ESs**) of **25**.

**Table S12.** Calculated excitation energy, excitation wavelength, oscillator strength, transition type and corresponding contribution of each excited state (**ES**) of **25**.

| Excited State( <b>E</b><br><b>S</b> ) | Excitation Energy /eV | Excitation Wavelength / nm | Oscillator Strength | Transition Type  | Contribution  |
|---------------------------------------|-----------------------|----------------------------|---------------------|------------------|---------------|
| 1                                     | 2.7329                | 453.68                     | 0.2416              | HOMO-2→LUMO      | 2.12%         |
|                                       |                       |                            |                     | <b>HOMO→LUMO</b> | <b>89.31%</b> |

|    |        |        |        |                      |               |
|----|--------|--------|--------|----------------------|---------------|
| 2  | 3.2315 | 383.67 | 0.3588 | HOMO-6→LUMO          | 6.11%         |
|    |        |        |        | <b>HOMO-2→LUMO</b>   | <b>16.62%</b> |
|    |        |        |        | <b>HOMO-1→LUMO</b>   | <b>61.49%</b> |
|    |        |        |        | HOMO→LUMO            | 2.24%         |
|    |        |        |        | HOMO→LUMO+1          | 4.52%         |
| 3  | 3.3037 | 375.28 | 0.2090 | HOMO-6→LUMO          | 4.67%         |
|    |        |        |        | <b>HOMO-2→LUMO</b>   | <b>70.54%</b> |
|    |        |        |        | <b>HOMO-1→LUMO</b>   | <b>11.49%</b> |
|    |        |        |        | HOMO-1→LUMO+2        | 2.20%         |
|    |        |        |        | HOMO→LUMO+1          | 2.48%         |
| 5  | 4.0015 | 309.84 | 1.4731 | HOMO-1→LUMO          | 8.25%         |
|    |        |        |        | HOMO-1→LUMO+3        | 2.81%         |
| 9  | 4.4406 | 279.20 | 0.2278 | <b>HOMO→LUMO+1</b>   | <b>74.13%</b> |
|    |        |        |        | <b>HOMO-8→LUMO</b>   | <b>18.05%</b> |
|    |        |        |        | HOMO-7→LUMO          | 2.48%         |
|    |        |        |        | <b>HOMO-5→LUMO</b>   | <b>28.61%</b> |
|    |        |        |        | HOMO-3→LUMO          | 9.12%         |
|    |        |        |        | HOMO-3→LUMO+1        | 2.29%         |
|    |        |        |        | HOMO-2→LUMO+2        | 2.53%         |
|    |        |        |        | HOMO-1→LUMO+1        | 3.86%         |
|    |        |        |        | HOMO→LUMO+2          | 5.18%         |
| 12 | 4.6445 | 266.95 | 0.7025 | HOMO→LUMO+4          | 4.87%         |
|    |        |        |        | HOMO-4→LUMO          | 7.75%         |
|    |        |        |        | HOMO-3→LUMO          | 6.52%         |
|    |        |        |        | HOMO-2→LUMO+1        | 4.35%         |
|    |        |        |        | HOMO-2→LUMO+2        | 2.01%         |
|    |        |        |        | HOMO-2→LUMO+4        | 2.25%         |
|    |        |        |        | <b>HOMO-1→LUMO+1</b> | <b>36.78%</b> |
|    |        |        |        | HOMO-1→LUMO+5        | 2.33%         |
|    |        |        |        | <b>HOMO→LUMO+3</b>   | <b>20.13%</b> |
| 13 | 4.7056 | 263.48 | 0.3505 | HOMO→LUMO+4          | 3.63%         |
|    |        |        |        | HOMO-4→LUMO          | 9.82%         |
|    |        |        |        | <b>HOMO-3→LUMO</b>   | <b>13.94%</b> |
|    |        |        |        | <b>HOMO-2→LUMO+2</b> | <b>15.20%</b> |
|    |        |        |        | HOMO-2→LUMO+3        | 6.03%         |
|    |        |        |        | HOMO-2→LUMO+4        | 2.97%         |
|    |        |        |        | HOMO-1→LUMO+1        | 2.78%         |
|    |        |        |        | HOMO-1→LUMO+3        | 2.13%         |
|    |        |        |        | <b>HOMO→LUMO+2</b>   | <b>10.56%</b> |
| 16 | 4.8914 | 253.47 | 0.3219 | <b>HOMO→LUMO+3</b>   | <b>21.04%</b> |
|    |        |        |        | <b>HOMO-10→LUMO</b>  | <b>28.81%</b> |
|    |        |        |        | <b>HOMO-6→LUMO</b>   | <b>23.37%</b> |
|    |        |        |        | HOMO-1→LUMO          | 5.45%         |

|    |        |        |        |                      |               |
|----|--------|--------|--------|----------------------|---------------|
|    |        |        |        | HOMO-1→LUMO+2        | 2.26%         |
|    |        |        |        | <b>HOMO-1→LUMO+3</b> | <b>12.64%</b> |
| 17 | 5.0806 | 244.03 | 0.2793 | <b>HOMO-10→LUMO</b>  | <b>28.57%</b> |
|    |        |        |        | HOMO-10→LUMO+2       | 2.32%         |
|    |        |        |        | <b>HOMO-6→LUMO</b>   | <b>22.64%</b> |
|    |        |        |        | HOMO-5→LUMO          | 3.64%         |
|    |        |        |        | <b>HOMO-2→LUMO+1</b> | <b>12.59%</b> |
|    |        |        |        | HOMO-1→LUMO+1        | 6.40%         |
|    |        |        |        | HOMO→LUMO+4          | 5.47%         |
| 35 | 5.9059 | 209.93 | 0.1246 | HOMO-16→LUMO         | 2.71%         |
|    |        |        |        | HOMO-13→LUMO         | 2.32%         |
|    |        |        |        | HOMO-12→LUMO         | 6.86%         |
|    |        |        |        | HOMO-5→LUMO+2        | 8.72%         |
|    |        |        |        | HOMO-5→LUMO+3        | 2.54%         |
|    |        |        |        | <b>HOMO-3→LUMO+1</b> | <b>16.79%</b> |
|    |        |        |        | <b>HOMO-3→LUMO+2</b> | <b>12.21%</b> |
|    |        |        |        | HOMO-3→LUMO+3        | 9.27%         |
|    |        |        |        | HOMO-2→LUMO+2        | 2.31%         |
|    |        |        |        | HOMO→LUMO+6          | 2.32%         |
|    |        |        |        | HOMO→LUMO+7          | 2.79%         |
| 39 | 6.0069 | 206.40 | 0.2112 | HOMO-14→LUMO         | 3.32%         |
|    |        |        |        | HOMO-12→LUMO         | 2.97%         |
|    |        |        |        | <b>HOMO-4→LUMO+1</b> | <b>25.76%</b> |
|    |        |        |        | <b>HOMO-4→LUMO+2</b> | <b>15.75%</b> |
|    |        |        |        | HOMO-4→LUMO+3        | 7.45%         |
|    |        |        |        | HOMO→LUMO+3          | 2.20%         |
|    |        |        |        | HOMO→LUMO+4          | 4.29%         |
|    |        |        |        | HOMO→LUMO+6          | 2.74%         |
|    |        |        |        | HOMO→LUMO+7          | 3.55%         |

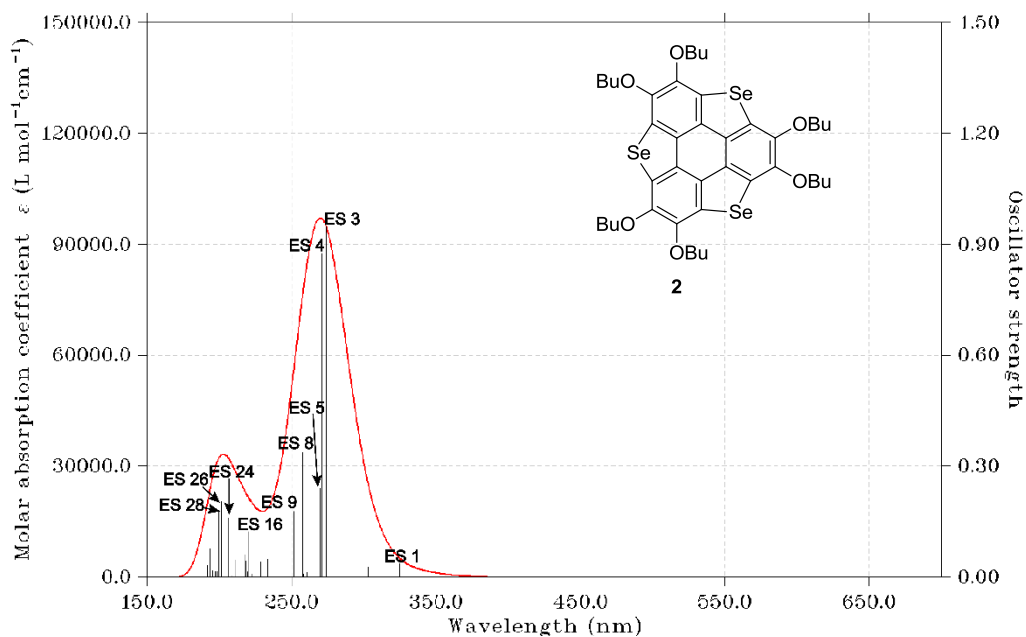

**Figure S48.** Calculated UV-Vis absorption spectra and corresponding excitation states (ESs) of **2**.

**Table S13.** Calculated excitation energy, excitation wavelength, oscillator strength, transition type and corresponding contribution of each excited state (ES) of **2**.

| Excited State (ES) | Excitation Energy / eV | Excitation Wavelength / nm | Oscillator Strength | Transition Type      | Contribution  |
|--------------------|------------------------|----------------------------|---------------------|----------------------|---------------|
| 1                  | 3.8158                 | 324.93                     | 0.0368              | HOMO-1→LUMO          | 3.31%         |
|                    |                        |                            |                     | <b>HOMO-1→LUMO+1</b> | <b>27.15%</b> |
|                    |                        |                            |                     | <b>HOMO→LUMO</b>     | <b>59.57%</b> |
|                    |                        |                            |                     | HOMO→LUMO+1          | 3.20%         |
| 3                  | 4.5231                 | 274.11                     | 0.9475              | <b>HOMO-1→LUMO</b>   | <b>35.79%</b> |
|                    |                        |                            |                     | <b>HOMO-1→LUMO+1</b> | <b>18.51%</b> |
|                    |                        |                            |                     | HOMO→LUMO            | 6.46%         |
|                    |                        |                            |                     | <b>HOMO→LUMO+1</b>   | <b>22.23%</b> |
|                    |                        |                            |                     | HOMO→LUMO+2          | 4.80%         |
| 4                  | 4.5820                 | 270.59                     | 0.8759              | <b>HOMO-1→LUMO</b>   | <b>11.78%</b> |
|                    |                        |                            |                     | <b>HOMO-1→LUMO+1</b> | <b>34.68%</b> |
|                    |                        |                            |                     | HOMO-1→LUMO+3        | 2.05%         |
|                    |                        |                            |                     | <b>HOMO→LUMO</b>     | <b>17.40%</b> |
|                    |                        |                            |                     | HOMO→LUMO+1          | 9.20%         |
|                    |                        |                            |                     | <b>HOMO→LUMO+3</b>   | <b>11.38%</b> |
| 5                  | 4.5963                 | 269.75                     | 0.2413              | HOMO-4→LUMO+3        | 7.40%         |
|                    |                        |                            |                     | HOMO-4→LUMO+5        | 2.45%         |
|                    |                        |                            |                     | HOMO-3→LUMO+3        | 4.79%         |

|    |        |        |        |                      |               |
|----|--------|--------|--------|----------------------|---------------|
|    |        |        |        | HOMO-1→LUMO          | 3.26%         |
|    |        |        |        | HOMO-1→LUMO+1        | 8.55%         |
|    |        |        |        | HOMO-1→LUMO+3        | 8.90%         |
|    |        |        |        | HOMO→LUMO            | 4.15%         |
|    |        |        |        | HOMO→LUMO+1          | 2.74%         |
|    |        |        |        | <b>HOMO→LUMO+3</b>   | <b>42.45%</b> |
|    |        |        |        | HOMO→LUMO+5          | 5.85%         |
| 8  | 4.8087 | 257.83 | 0.3375 | HOMO-3→LUMO          | 3.31%         |
|    |        |        |        | HOMO-3→LUMO+1        | 3.01%         |
|    |        |        |        | HOMO-2→LUMO          | 9.75%         |
|    |        |        |        | HOMO-2→LUMO+1        | 2.96%         |
|    |        |        |        | HOMO-1→LUMO          | 5.69%         |
|    |        |        |        | HOMO-1→LUMO+2        | 2.75%         |
|    |        |        |        | HOMO→LUMO+1          | 3.48%         |
|    |        |        |        | <b>HOMO→LUMO+2</b>   | <b>52.17%</b> |
| 9  | 4.9268 | 251.65 | 0.1771 | HOMO-4→LUMO          | 3.86%         |
|    |        |        |        | HOMO-4→LUMO+1        | 4.33%         |
|    |        |        |        | HOMO-3→LUMO          | 4.93%         |
|    |        |        |        | HOMO-3→LUMO+1        | 5.33%         |
|    |        |        |        | HOMO-2→LUMO          | 7.03%         |
|    |        |        |        | HOMO-2→LUMO+1        | 2.81%         |
|    |        |        |        | HOMO-1→LUMO+1        | 3.29%         |
|    |        |        |        | <b>HOMO-1→LUMO+2</b> | <b>47.11%</b> |
|    |        |        |        | HOMO→LUMO+2          | 5.57%         |
| 16 | 5.6227 | 220.51 | 0.1224 | HOMO-5→LUMO+1        | 3.10%         |
|    |        |        |        | <b>HOMO-3→LUMO</b>   | <b>18.16%</b> |
|    |        |        |        | <b>HOMO-2→LUMO+1</b> | <b>22.08%</b> |
|    |        |        |        | <b>HOMO-1→LUMO+2</b> | <b>11.28%</b> |
|    |        |        |        | HOMO-1→LUMO+3        | 7.30%         |
|    |        |        |        | HOMO→LUMO+2          | 9.63%         |
|    |        |        |        | HOMO→LUMO+5          | 5.26%         |
|    |        |        |        | HOMO→LUMO+6          | 2.99%         |
|    |        |        |        | HOMO→LUMO+7          | 2.54%         |
| 24 | 6.0019 | 206.57 | 0.1601 | <b>HOMO-5→LUMO</b>   | <b>23.71%</b> |
|    |        |        |        | HOMO-4→LUMO          | 6.44%         |
|    |        |        |        | <b>HOMO-4→LUMO+1</b> | <b>32.96%</b> |
|    |        |        |        | HOMO-3→LUMO+1        | 5.39%         |
|    |        |        |        | HOMO-3→LUMO+2        | 2.75%         |
|    |        |        |        | HOMO-1→LUMO+2        | 4.07%         |
|    |        |        |        | HOMO→LUMO+7          | 3.18%         |
|    |        |        |        | HOMO→LUMO+11         | 6.01%         |
| 26 | 6.1695 | 200.96 | 0.2038 | <b>HOMO-5→LUMO</b>   | <b>22.07%</b> |
|    |        |        |        | HOMO-4→LUMO+2        | 9.82%         |
|    |        |        |        | <b>HOMO-3→LUMO+2</b> | <b>14.17%</b> |

|    |        |        |        |                      |               |
|----|--------|--------|--------|----------------------|---------------|
|    |        |        |        | HOMO-2→LUMO+2        | 7.36%         |
|    |        |        |        | <b>HOMO-1→LUMO+6</b> | <b>20.48%</b> |
|    |        |        |        | HOMO-1→LUMO+7        | 8.54%         |
| 28 | 6.2169 | 199.43 | 0.1787 | HOMO-7→LUMO          | 3.57%         |
|    |        |        |        | HOMO-6→LUMO+1        | 2.01%         |
|    |        |        |        | <b>HOMO-5→LUMO+1</b> | <b>30.84%</b> |
|    |        |        |        | HOMO-4→LUMO+2        | 2.33%         |
|    |        |        |        | HOMO-3→LUMO+2        | 5.86%         |
|    |        |        |        | HOMO-2→LUMO+2        | 5.54%         |
|    |        |        |        | HOMO-1→LUMO+6        | 2.51%         |
|    |        |        |        | HOMO-1→LUMO+7        | 6.37%         |
|    |        |        |        | HOMO→LUMO+7          | 4.58%         |
|    |        |        |        | HOMO→LUMO+9          | 4.54%         |
|    |        |        |        | HOMO→LUMO+10         | 7.31%         |

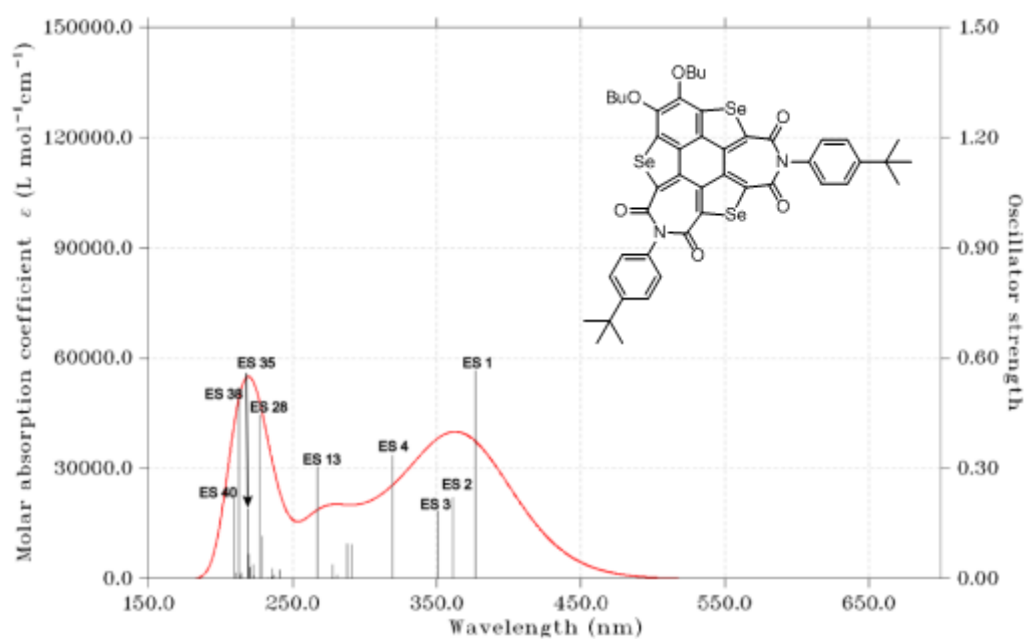

**Figure S49.** Calculated UV-Vis absorption spectra and corresponding excitation states (ESs) of **8**.

**Table S14.** Calculated excitation energy, excitation wavelength, oscillator strength, transition type and corresponding contribution of each excited state (ES) of **8**.

| Excited State (ES) | Excitation Energy / eV | Excitation Wavelength / nm | Oscillator Strength | Transition Type  | Contribution  |
|--------------------|------------------------|----------------------------|---------------------|------------------|---------------|
| 1                  | 3.292                  | 376.62                     | 0.5651              | HOMO-1→LUMO+1    | 4.04%         |
|                    |                        |                            |                     | <b>HOMO→LUMO</b> | <b>89.43%</b> |

|    |        |        |        |                      |               |
|----|--------|--------|--------|----------------------|---------------|
| 2  | 3.4377 | 360.67 | 0.2208 | HOMO-6→LUMO+1        | 7.20%         |
|    |        |        |        | <b>HOMO-→LUMO+1</b>  | <b>85.51%</b> |
| 3  | 3.5384 | 350.4  | 0.1854 | <b>HOMO-1→LUMO</b>   | <b>89.28%</b> |
|    |        |        |        | HOMO→LUMO+2          | 3.13%         |
| 4  | 3.8838 | 319.23 | 0.3355 | HOMO-7→LUMO+1        | 6.18%         |
|    |        |        |        | HOMO-6→LUMO          | 4.78%         |
|    |        |        |        | HOMO-4→LUMO+1        | 9.22%         |
|    |        |        |        | <b>HOMO-1→LUMO+1</b> | <b>65.4%</b>  |
|    |        |        |        | HOMO→LUMO            | 6.03%         |
| 13 | 4.6477 | 266.77 | 0.304  | HOMO-7→LUMO          | 2.92%         |
|    |        |        |        | HOMO-4→LUMO          | 5.26%         |
|    |        |        |        | HOMO-1→LUMO          | 4.73%         |
|    |        |        |        | <b>HOMO→LUMO+2</b>   | <b>73.58%</b> |
|    |        |        |        | HOMO→LUMO+4          | 3.79%         |
| 28 | 5.4586 | 227.13 | 0.4454 | <b>HOMO-13→LUMO</b>  | <b>27.12%</b> |
|    |        |        |        | HOMO-11→LUMO         | 6.93%         |
|    |        |        |        | HOMO7→LUMO+2         | 5.53%         |
|    |        |        |        | HOMO-5→LUMO          | 3.86%         |
|    |        |        |        | HOMO4→LUMO+1         | 3.44%         |
|    |        |        |        | <b>HOMO-4→LUMO+2</b> | <b>19.61%</b> |
|    |        |        |        | <b>HOMO-1→LUMO+2</b> | <b>12.51%</b> |
|    |        |        |        | HOMO→LUMO+11         | 6.90%         |
| 35 | 5.6596 | 219.07 | 0.1897 | <b>HOMO-15→LUMO</b>  | <b>22.16%</b> |
|    |        |        |        | HOMO-15→LUMO+1       | 3.45%         |
|    |        |        |        | HOMO-14→LUMO         | 7.82%         |
|    |        |        |        | HOMO-13→LUMO         | 6.78%         |
|    |        |        |        | HOMO13→LUMO+2        | 2.81%         |
|    |        |        |        | HOMO-7→LUMO+2        | 6.09%         |
|    |        |        |        | HOMO-4→LUMO+2        | 5.10%         |
|    |        |        |        | HOMO-4→LUMO+3        | 2.47%         |
|    |        |        |        | <b>HOMO-1→LUMO+3</b> | <b>17.49%</b> |
|    |        |        |        | HOMO-1→LUMO+4        | 5.83%         |
| 38 | 5.8293 | 212.69 | 0.4823 | HOMO13→LUMO+2        | 4.63%         |
|    |        |        |        | <b>HOMO-12→LUMO</b>  | <b>24.37%</b> |
|    |        |        |        | <b>HOMO11→LUMO+1</b> | <b>28.35%</b> |
|    |        |        |        | HOMO-7→LUMO+2        | 5.46%         |
|    |        |        |        | <b>HOMO-6→LUMO+2</b> | <b>36.40%</b> |
|    |        |        |        | HOMO→LUMO+4          | 8.19%         |
| 40 | 5.9306 | 209.06 | 0.2172 | HOMO16→LUMO+1        | 6.88%         |
|    |        |        |        | HOMO-15→LUMO         | 4.52%         |
|    |        |        |        | <b>HOMO15→LUMO+1</b> | <b>10.12%</b> |
|    |        |        |        | HOMO-14→LUMO         | 6.01%         |
|    |        |        |        | HOMO14→LUMO+1        | 3.16%         |
|    |        |        |        | HOMO12→LUMO+1        | 7.00%         |

|  |  |  |                     |               |
|--|--|--|---------------------|---------------|
|  |  |  | <b>HOMO-11→LUMO</b> | <b>10.10%</b> |
|  |  |  | HOMO-9→LUMO+1       | 2.14%         |
|  |  |  | HOMO-7→LUMO+2       | 3.98%         |
|  |  |  | HOMO-6→LUMO+3       | 3.24%         |
|  |  |  | HOMO-4→LUMO+2       | 7.86%         |
|  |  |  | HOMO-1→LUMO+4       | 7.23%         |
|  |  |  | HOMO→LUMO+3         | 2.54%         |

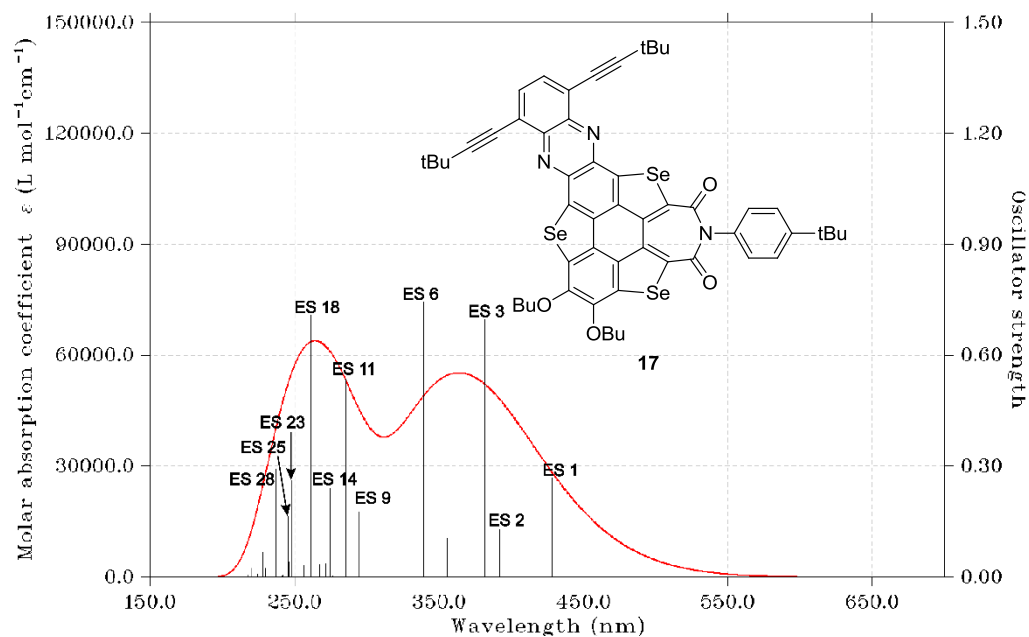

**Figure S50.** Calculated UV-Vis absorption spectra and corresponding excitation states (ESs) of **17**.

**Table S15.** Calculated excitation energy, excitation wavelength, oscillator strength, transition type and corresponding contribution of each excited state (ES) of **17**.

| Excited State (ES) | Excitation Energy / eV | Excitation Wavelength / nm | Oscillator Strength | Transition Type      | Contribution  |
|--------------------|------------------------|----------------------------|---------------------|----------------------|---------------|
| 1                  | 2.8966                 | 428.04                     | 0.2664              | <b>HOMO-1→LUMO</b>   | <b>20.29%</b> |
|                    |                        |                            |                     | <b>HOMO→LUMO</b>     | <b>70.73%</b> |
| 2                  | 3.1615                 | 392.17                     | 0.1286              | HOMO-7→LUMO          | 2.71%         |
|                    |                        |                            |                     | HOMO-1→LUMO          | 9.17%         |
|                    |                        |                            |                     | <b>HOMO-1→LUMO+1</b> | <b>10.76%</b> |
|                    |                        |                            |                     | <b>HOMO→LUMO</b>     | <b>8.57%</b>  |
| 3                  | 3.2519                 | 381.26                     | 0.6967              | <b>HOMO→LUMO+1</b>   | <b>59.87%</b> |
|                    |                        |                            |                     | HOMO-7→LUMO          | 5.36%         |
|                    |                        |                            |                     | <b>HOMO-1→LUMO</b>   | <b>53.88%</b> |
|                    |                        |                            |                     | <b>HOMO-1→LUMO+1</b> | <b>11.11%</b> |



|    |        |        |        |                      |               |
|----|--------|--------|--------|----------------------|---------------|
|    |        |        |        | HOMO→LUMO            | 7.03%         |
|    |        |        |        | <b>HOMO→LUMO+1</b>   | <b>10.92%</b> |
|    |        |        |        | HOMO→LUMO+2          | 3.10%         |
| 4  | 3.487  | 355.56 | 0.1065 | HOMO-4→LUMO          | 4.03%         |
|    |        |        |        | <b>HOMO-2→LUMO</b>   | <b>57.22%</b> |
|    |        |        |        | <b>HOMO-2→LUMO+1</b> | <b>18.20%</b> |
|    |        |        |        | HOMO-1→LUMO+1        | 5.23%         |
|    |        |        |        | HOMO→LUMO+3          | 2.70%         |
| 6  | 3.6532 | 339.38 | 0.7449 | HOMO-4→LUMO          | 4.60%         |
|    |        |        |        | <b>HOMO-2→LUMO</b>   | <b>18.73%</b> |
|    |        |        |        | <b>HOMO-2→LUMO+1</b> | <b>36.29%</b> |
|    |        |        |        | HOMO-1→LUMO          | 2.62%         |
|    |        |        |        | <b>HOMO-1→LUMO+1</b> | <b>14.14%</b> |
|    |        |        |        | HOMO→LUMO+1          | 8.67%         |
| 9  | 4.057  | 294.8  | 0.1762 | HOMO-7→LUMO          | 6.39%         |
|    |        |        |        | HOMO-7→LUMO+1        | 2.47%         |
|    |        |        |        | <b>HOMO-5→LUMO+1</b> | <b>20.67%</b> |
|    |        |        |        | <b>HOMO-4→LUMO+1</b> | <b>44.10%</b> |
|    |        |        |        | HOMO-1→LUMO+2        | 2.03%         |
|    |        |        |        | HOMO→LUMO+2          | 3.10%         |
|    |        |        |        | HOMO→LUMO+4          | 2.70%         |
| 11 | 4.3407 | 285.63 | 0.5361 | HOMO-7→LUMO          | 2.43%         |
|    |        |        |        | HOMO-7→LUMO+1        | 8.69%         |
|    |        |        |        | HOMO-6→LUMO          | 7.64%         |
|    |        |        |        | HOMO-5→LUMO          | 7.08%         |
|    |        |        |        | HOMO-4→LUMO          | 5.39%         |
|    |        |        |        | HOMO-2→LUMO+1        | 2.16%         |
|    |        |        |        | <b>HOMO-1→LUMO+2</b> | <b>14.67%</b> |
|    |        |        |        | <b>HOMO→LUMO+2</b>   | <b>29.42%</b> |
|    |        |        |        | HOMO→LUMO+3          | 2.84%         |
| 14 | 4.5147 | 274.62 | 0.2408 | HOMO-11→LUMO         | 2.13%         |
|    |        |        |        | HOMO-7→LUMO          | 2.43%         |
|    |        |        |        | HOMO-7→LUMO+1        | 2.39%         |
|    |        |        |        | <b>HOMO-6→LUMO</b>   | <b>12.84%</b> |
|    |        |        |        | HOMO-5→LUMO          | 7.81%         |
|    |        |        |        | <b>HOMO-4→LUMO</b>   | <b>12.46%</b> |
|    |        |        |        | HOMO-4→LUMO+1        | 2.52%         |
|    |        |        |        | HOMO-2→LUMO          | 3.75%         |
|    |        |        |        | HOMO-2→LUMO+1        | 7.01%         |
|    |        |        |        | HOMO-2→LUMO+3        | 3.85%         |
|    |        |        |        | HOMO-1→LUMO+4        | 2.75%         |
|    |        |        |        | <b>HOMO→LUMO+2</b>   | <b>21.69%</b> |
|    |        |        |        | HOMO→LUMO+5          | 2.62%         |
| 18 | 4.7494 | 261.05 | 0.7087 | HOMO-2→LUMO+4        | 2.35%         |

|    |        |        |        |                      |               |
|----|--------|--------|--------|----------------------|---------------|
|    |        |        |        | HOMO-1→LUMO+2        | 7.63%         |
|    |        |        |        | <b>HOMO-1→LUMO+3</b> | <b>17.62%</b> |
|    |        |        |        | HOMO-1→LUMO+4        | 8.34%         |
|    |        |        |        | HOMO-1→LUMO+5        | 3.18%         |
|    |        |        |        | HOMO→LUMO+2          | 5.66%         |
|    |        |        |        | <b>HOMO→LUMO+3</b>   | <b>35.52%</b> |
|    |        |        |        | HOMO→LUMO+4          | 5.11%         |
| 23 | 4.9939 | 248.27 | 0.2618 | <b>HOMO-11→LUMO</b>  | <b>18.99%</b> |
|    |        |        |        | HOMO-7→LUMO          | 4.90%         |
|    |        |        |        | <b>HOMO-7→LUMO+1</b> | <b>11.32%</b> |
|    |        |        |        | HOMO-4→LUMO+1        | 5.19%         |
|    |        |        |        | <b>HOMO-2→LUMO+2</b> | <b>23.60%</b> |
|    |        |        |        | HOMO-1→LUMO+2        | 7.52%         |
|    |        |        |        | HOMO-1→LUMO+3        | 5.02%         |
| 25 | 5.0585 | 245.00 | 0.1642 | HOMO-7→LUMO          | 9.42%         |
|    |        |        |        | HOMO-4→LUMO          | 2.47%         |
|    |        |        |        | HOMO-2→LUMO+3        | 3.89%         |
|    |        |        |        | HOMO-2→LUMO+7        | 8.62%         |
|    |        |        |        | HOMO-2→LUMO+8        | 2.57%         |
|    |        |        |        | HOMO-1→LUMO+2        | 2.66%         |
|    |        |        |        | HOMO-1→LUMO+3        | 5.79%         |
|    |        |        |        | <b>HOMO→LUMO+3</b>   | <b>10.11%</b> |
|    |        |        |        | <b>HOMO→LUMO+4</b>   | <b>16.59%</b> |
|    |        |        |        | HOMO→LUMO+5          | 2.45%         |
|    |        |        |        | HOMO→LUMO+7          | 5.07%         |
| 28 | 5.2249 | 239.29 | 0.2915 | HOMO-15→LUMO         | 7.73%         |
|    |        |        |        | HOMO-7→LUMO          | 5.51%         |
|    |        |        |        | <b>HOMO-4→LUMO+2</b> | <b>10.15%</b> |
|    |        |        |        | HOMO-2→LUMO+3        | 9.88%         |
|    |        |        |        | HOMO-1→LUMO+1        | 7.32%         |
|    |        |        |        | HOMO-1→LUMO+2        | 5.26%         |
|    |        |        |        | HOMO→LUMO+1          | 3.72%         |
|    |        |        |        | HOMO→LUMO+2          | 2.89%         |
|    |        |        |        | HOMO→LUMO+3          | 2.47%         |
|    |        |        |        | HOMO→LUMO+4          | 3.24%         |
|    |        |        |        | HOMO→LUMO+5          | 11.54%        |

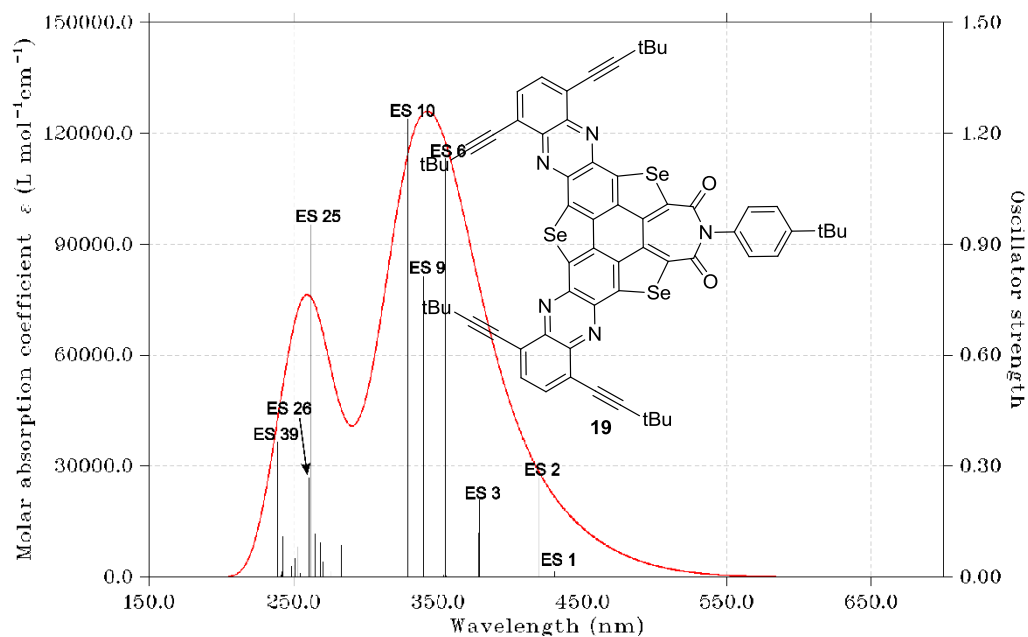

**Figure S51.** Calculated UV-Vis absorption spectra and corresponding excitation states (ESs) of **19**.

**Table S16.** Calculated excitation energy, excitation wavelength, oscillator strength, transition type and corresponding contribution of each excited state (ES) of **19**.

| Excited State (ES) | Excitation Energy / eV | Excitation Wavelength / nm | Oscillator strength | Transition Type | Contribution |
|--------------------|------------------------|----------------------------|---------------------|-----------------|--------------|
| 1                  | 2.8814                 | 430.29                     | 0.0162              | HOMO-1→LUMO+1   | 30.71%       |
|                    |                        |                            |                     | HOMO→LUMO       | 58.90%       |
|                    |                        |                            |                     | HOMO→LUMO+2     | 2.52%        |
| 2                  | 2.9565                 | 419.36                     | 0.2683              | HOMO-2→LUMO+1   | 4.33%        |
|                    |                        |                            |                     | HOMO-1→LUMO     | 54.59%       |
|                    |                        |                            |                     | HOMO→LUMO+1     | 34.52%       |
| 3                  | 3.2769                 | 378.36                     | 0.2093              | HOMO-11→LUMO    | 3.26%        |
|                    |                        |                            |                     | HOMO-11→LUMO+1  | 4.97%        |
|                    |                        |                            |                     | HOMO-3→LUMO     | 2.43%        |
|                    |                        |                            |                     | HOMO-3→LUMO+2   | 3.34%        |
|                    |                        |                            |                     | HOMO-2→LUMO     | 42.49%       |
|                    |                        |                            |                     | HOMO-2→LUMO+1   | 9.37%        |
|                    |                        |                            |                     | HOMO-2→LUMO+2   | 2.36%        |
|                    |                        |                            |                     | HOMO-1→LUMO+1   | 2.72%        |
|                    |                        |                            |                     | HOMO-1→LUMO+2   | 3.82%        |
|                    |                        |                            |                     | HOMO→LUMO       | 5.73%        |
|                    |                        |                            |                     | HOMO→LUMO+1     | 6.28%        |
| HOMO→LUMO+2        | 2.12%                  |                            |                     |                 |              |
| 6                  | 3.4927                 | 354.99                     | 1.1322              | HOMO-5→LUMO     | 5.32%        |

|    |        |        |        |                      |               |
|----|--------|--------|--------|----------------------|---------------|
|    |        |        |        | HOMO-3→LUMO+1        | 4.15%         |
|    |        |        |        | HOMO-2→LUMO          | 4.84%         |
|    |        |        |        | <b>HOMO-2→LUMO+2</b> | <b>45.46%</b> |
|    |        |        |        | HOMO-1→LUMO+1        | 3.43%         |
|    |        |        |        | <b>HOMO→LUMO+2</b>   | <b>26.02%</b> |
| 9  | 3.6507 | 339.61 | 0.8121 | HOMO-7→LUMO          | 3.42%         |
|    |        |        |        | <b>HOMO-5→LUMO</b>   | <b>10.16%</b> |
|    |        |        |        | HOMO-5→LUMO+2        | 2.99%         |
|    |        |        |        | <b>HOMO-3→LUMO+1</b> | <b>51.78%</b> |
|    |        |        |        | HOMO-1→LUMO+1        | 8.89%         |
|    |        |        |        | HOMO-1→LUMO+3        | 2.36%         |
|    |        |        |        | HOMO→LUMO+2          | 9.63%         |
| 10 | 3.7743 | 328.50 | 1.2390 | <b>HOMO-3→LUMO+2</b> | <b>33.95%</b> |
|    |        |        |        | <b>HOMO-2→LUMO+1</b> | <b>16.50%</b> |
|    |        |        |        | <b>HOMO-1→LUMO+2</b> | <b>35.11%</b> |
|    |        |        |        | HOMO→LUMO+1          | 4.31%         |
| 25 | 4.7317 | 262.03 | 0.9522 | HOMO-5→LUMO+1        | 2.18%         |
|    |        |        |        | HOMO-3→LUMO          | 4.28%         |
|    |        |        |        | HOMO-3→LUMO+4        | 2.61%         |
|    |        |        |        | HOMO-2→LUMO+6        | 2.64%         |
|    |        |        |        | HOMO-1→LUMO          | 3.35%         |
|    |        |        |        | <b>HOMO-1→LUMO+4</b> | <b>22.17%</b> |
|    |        |        |        | HOMO-1→LUMO+5        | 9.46%         |
|    |        |        |        | <b>HOMO→LUMO+3</b>   | <b>18.29%</b> |
|    |        |        |        | <b>HOMO→LUMO+6</b>   | <b>15.91%</b> |
| 26 | 4.7586 | 260.55 | 0.2697 | HOMO-7→LUMO+2        | 4.32%         |
|    |        |        |        | HOMO-5→LUMO          | 7.26%         |
|    |        |        |        | HOMO-2→LUMO+4        | 4.04%         |
|    |        |        |        | <b>HOMO-1→LUMO+3</b> | <b>15.98%</b> |
|    |        |        |        | <b>HOMO-1→LUMO+6</b> | <b>16.74%</b> |
|    |        |        |        | <b>HOMO→LUMO+4</b>   | <b>21.21%</b> |
|    |        |        |        | <b>HOMO→LUMO+5</b>   | <b>11.75%</b> |
| 39 | 5.1895 | 238.91 | 0.3645 | HOMO-19→LUMO+1       | 2.07%         |
|    |        |        |        | HOMO-11→LUMO+1       | 5.11%         |
|    |        |        |        | HOMO-7→LUMO+2        | 7.21%         |
|    |        |        |        | HOMO-6→LUMO+2        | 4.23%         |
|    |        |        |        | <b>HOMO-3→LUMO+3</b> | <b>27.98%</b> |
|    |        |        |        | HOMO-3→LUMO+8        | 2.31%         |
|    |        |        |        | <b>HOMO-1→LUMO+3</b> | <b>17.81%</b> |
|    |        |        |        | HOMO-1→LUMO+6        | 7.98%         |
|    |        |        |        | HOMO→LUMO+4          | 2.16%         |

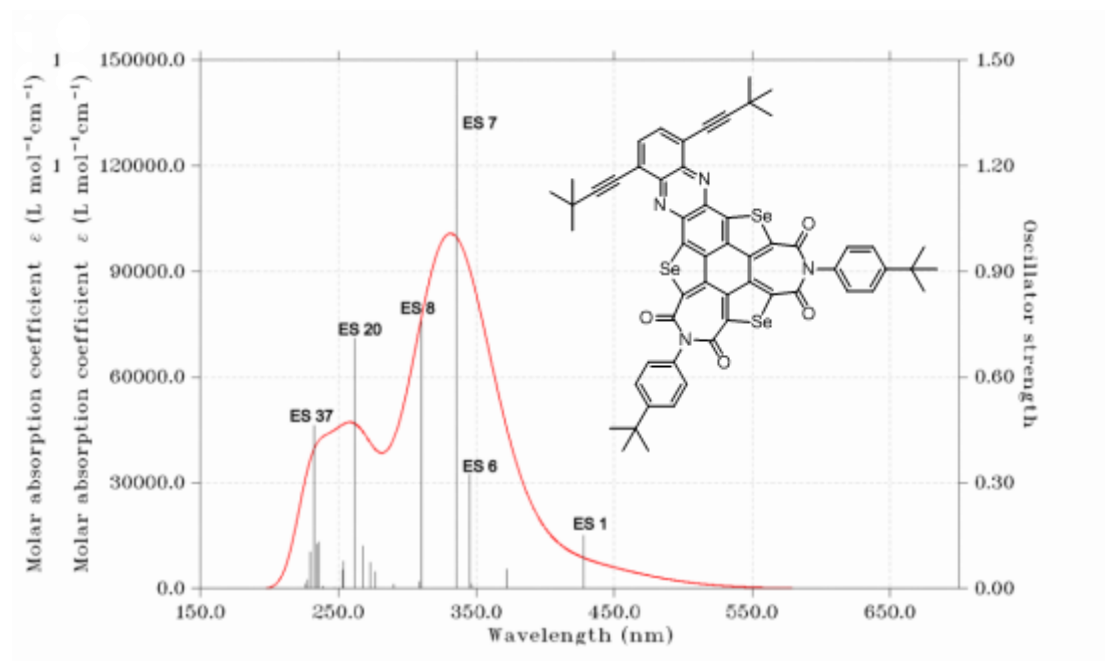

**Figure S52.** Calculated UV-Vis absorption spectra and corresponding excitation states (ESs) of **21**.

**Table S17.** Calculated excitation energy, excitation wavelength, oscillator strength, transition type and corresponding contribution of each excited state (ES) of **21**.

| Excited State (ES) | Excitation Energy / eV | Excitation Wavelength / nm | Oscillator Strength | Transition Type      | Contribution  |
|--------------------|------------------------|----------------------------|---------------------|----------------------|---------------|
| 1                  | 2.8015                 | 427.31                     | 0.1511              | <b>HOMO→LUMO</b>     | <b>88.25%</b> |
|                    |                        |                            |                     | HOMO→LUMO+2          | 5.41%         |
| 6                  | 3.5925                 | 345.12                     | 0.323               | HOMO-7→LUMO          | 2.84%         |
|                    |                        |                            |                     | HOMO-5→LUMO          | 8.96%         |
|                    |                        |                            |                     | HOMO-5→LUMO+2        | 3.89%         |
|                    |                        |                            |                     | <b>HOMO-2→LUMO+2</b> | <b>14.33%</b> |
|                    |                        |                            |                     | <b>HOMO-1→LUMO+1</b> | <b>59.90%</b> |
| 7                  | 3.6969                 | 335.37                     | 1.6814              | HOMO-8→LUMO          | 5.04%         |
|                    |                        |                            |                     | HOMO-8→LUMO+2        | 3.34%         |
|                    |                        |                            |                     | HOMO-5→LUMO+1        | 2.25%         |
|                    |                        |                            |                     | <b>HOMO-2→LUMO+1</b> | <b>19.57%</b> |
|                    |                        |                            |                     | HOMO-1→LUMO          | 6.00%         |
|                    |                        |                            |                     | <b>HOMO-1→LUMO+2</b> | <b>32.44%</b> |
|                    |                        |                            |                     | <b>HOMO→LUMO+1</b>   | <b>24.77%</b> |
| 8                  | 3.7961                 | 309.81                     | 0.7583              | HOMO-7→LUMO+2        | 2.31%         |
|                    |                        |                            |                     | HOMO-5→LUMO+2        | 7.91%         |
|                    |                        |                            |                     | <b>HOMO-2→LUMO+2</b> | <b>51.30%</b> |
|                    |                        |                            |                     | <b>HOMO-1→LUMO+1</b> | <b>23.33%</b> |
|                    |                        |                            |                     | HOMO→LUMO+2          | 8.58%         |
| 20                 | 4.7442                 | 261.34                     | 0.7095              | HOMO-5→LUMO          | 4.02%         |

|    |        |        |        |                    |               |
|----|--------|--------|--------|--------------------|---------------|
|    |        |        |        | HOMO-2→LUMO+5      | 2.66%         |
|    |        |        |        | <b>HOMO→LUMO+3</b> | <b>46.06%</b> |
|    |        |        |        | <b>HOMO→LUMO+5</b> | <b>32.08%</b> |
| 37 | 5.3406 | 232.15 | 0.4616 | HOMO-8→LUMO        | 5.25%         |
|    |        |        |        | HOMO-8→LUMO+3      | 3.37%         |
|    |        |        |        | HOMO-2→LUMO+4      | 2.84%         |
|    |        |        |        | HOMO-1→LUMO+3      | 3.56%         |
|    |        |        |        | HOMO-1→LUMO+5      | 5.26%         |
|    |        |        |        | HOMO→LUMO+1        | 9.65%         |
|    |        |        |        | <b>HOMO→LUMO+4</b> | <b>39.83%</b> |
|    |        |        |        | <b>HOMO→LUMO+6</b> | <b>15.09%</b> |

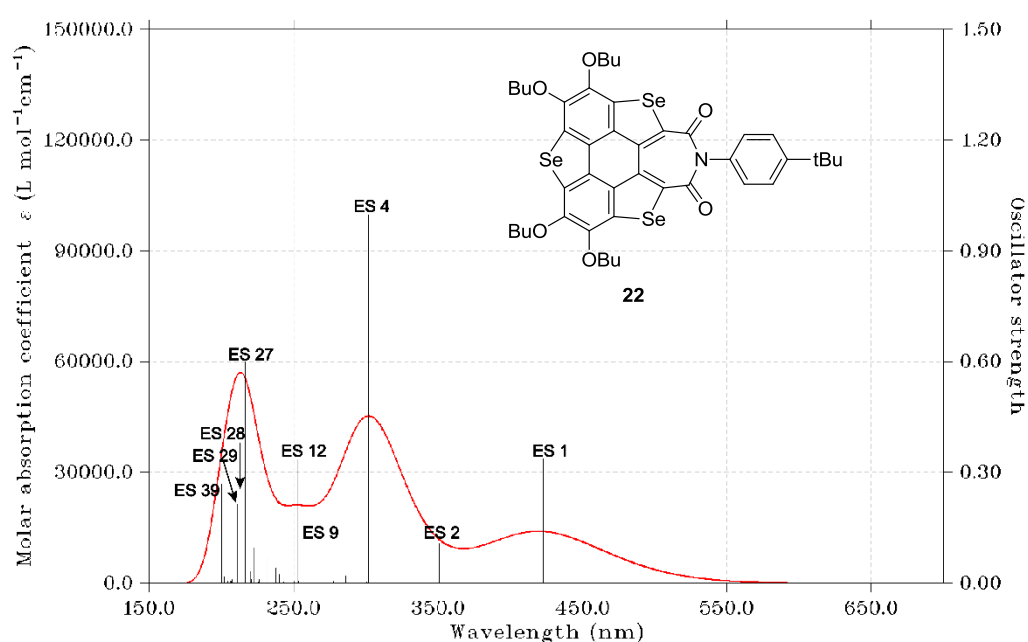

**Figure S53.** Calculated UV-Vis absorption spectra and corresponding excitation states (ESs) of **22**.

**Table S18.** Calculated excitation energy, excitation wavelength, oscillator strength, transition type and corresponding contribution of each excited state (ES) of **22**.

| Excited State(ES) | Excitation Energy /eV | Excitation Wavelength / nm | Oscillator Strength | Transition Type    | Contribution  |
|-------------------|-----------------------|----------------------------|---------------------|--------------------|---------------|
| 1                 | 2.9344                | 422.52                     | 0.3376              | <b>HOMO→LUMO</b>   | <b>96.55%</b> |
| 2                 | 3.5355                | 350.68                     | 0.1073              | HOMO-4→LUMO        | 2.74%         |
|                   |                       |                            |                     | <b>HOMO-1→LUMO</b> | <b>78.56%</b> |
|                   |                       |                            |                     | HOMO-1→LUMO+2      | 2.12%         |
|                   |                       |                            |                     | HOMO→LUMO+1        | 9.62%         |
| 4                 | 4.1076                | 301.84                     | 0.9967              | HOMO-4→LUMO        | 6.52%         |
|                   |                       |                            |                     | <b>HOMO-1→LUMO</b> | <b>13.45%</b> |
|                   |                       |                            |                     | <b>HOMO→LUMO+1</b> | <b>73.50%</b> |

|               |        |        |         |                      |               |
|---------------|--------|--------|---------|----------------------|---------------|
| 9             | 4.6518 | 266.53 | 0.1134  | HOMO-4→LUMO          | 2.16%         |
|               |        |        |         | HOMO-3→LUMO          | 6.04%         |
|               |        |        |         | <b>HOMO-1→LUMO+1</b> | <b>11.32%</b> |
|               |        |        |         | <b>HOMO→LUMO+2</b>   | <b>72.54%</b> |
| 12            | 4.9119 | 252.42 | 0.3354  | HOMO-6→LUMO          | 2.94%         |
|               |        |        |         | <b>HOMO-1→LUMO+1</b> | <b>67.80%</b> |
|               |        |        |         | <b>HOMO→LUMO+2</b>   | <b>13.12%</b> |
| 27            | 5.7277 | 216.46 | 0.5991  | HOMO-12→LUMO         | 3.46%         |
|               |        |        |         | <b>HOMO-11→LUMO</b>  | <b>35.79%</b> |
|               |        |        |         | <b>HOMO-10→LUMO</b>  | <b>12.34%</b> |
|               |        |        |         | HOMO-3→LUMO+1        | 4.46%         |
|               |        |        |         | <b>HOMO-1→LUMO+2</b> | <b>10.97%</b> |
|               |        |        |         | HOMO-1→LUMO+3        | 6.52%         |
|               |        |        |         | HOMO-1→LUMO+5        | 5.37%         |
|               |        |        |         | HOMO→LUMO+6          | 4.19%         |
| 28            | 5.8667 | 211.34 | 0..2132 | HOMO-16→LUMO         | 5.22%         |
|               |        |        |         | <b>HOMO-13→LUMO</b>  | <b>19.45%</b> |
|               |        |        |         | HOMO-12→LUMO         | 5.24%         |
|               |        |        |         | HOMO-11→LUMO         | 2.34%         |
|               |        |        |         | HOMO-10→LUMO         | 4.03%         |
|               |        |        |         | HOMO-8→LUMO+1        | 2.52%         |
|               |        |        |         | HOMO-6→LUMO+1        | 8.51%         |
|               |        |        |         | HOMO-5→LUMO+1        | 2.25%         |
|               |        |        |         | HOMO-4→LUMO+2        | 6.92%         |
|               |        |        |         | <b>HOMO-3→LUMO+1</b> | <b>12.14%</b> |
|               |        |        |         | <b>HOMO→LUMO+6</b>   | <b>10.67%</b> |
| HOMO→LUMO+10  | 2.07%  |        |         |                      |               |
| 29            | 5.8667 | 211.34 | 0.2132  | HOMO-6→LUMO+2        | 6.18%         |
|               |        |        |         | <b>HOMO-4→LUMO+1</b> | <b>13.35%</b> |
|               |        |        |         | HOMO-4→LUMO+2        | 2.89%         |
|               |        |        |         | HOMO-3→LUMO+1        | 3.17%         |
|               |        |        |         | <b>HOMO-3→LUMO+2</b> | <b>10.82%</b> |
|               |        |        |         | <b>HOMO-1→LUMO+6</b> | <b>29.95%</b> |
|               |        |        |         | HOMO-1→LUMO+8        | 6.38%         |
|               |        |        |         | HOMO→LUMO+3          | 5.62%         |
| HOMO→LUMO+5   | 5.26%  |        |         |                      |               |
| 39            | 6.1902 | 200.29 | 0.2677  | HOMO-17→LUMO         | 9.66%         |
|               |        |        |         | HOMO-16→LUMO         | 5.36%         |
|               |        |        |         | HOMO-12→LUMO         | 2.72%         |
|               |        |        |         | <b>HOMO-6→LUMO+2</b> | <b>30.35%</b> |
|               |        |        |         | <b>HOMO-5→LUMO+2</b> | <b>10.55%</b> |
| HOMO-3→LUMO+2 | 9.36%  |        |         |                      |               |

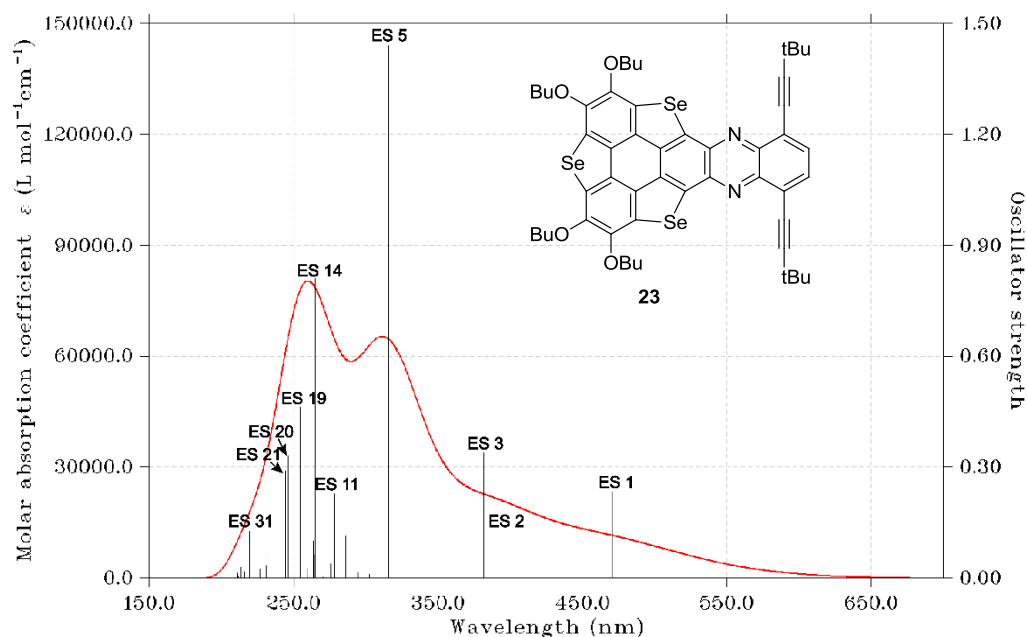

**Figure S54.** Calculated UV-Vis absorption spectra and corresponding excitation states (**ESs**) of **23**.

**Table S19.** Calculated excitation energy, excitation wavelength, oscillator strength, transition type and corresponding contribution of each excited state (**ES**) of **23**.

| Excited State ( <b>ES</b> ) | Excitation Energy /eV | Excitation Wavelength / nm | Oscillator Strength | Transition Type    | Contribution  |
|-----------------------------|-----------------------|----------------------------|---------------------|--------------------|---------------|
| 1                           | 2.6372                | 470.13                     | 0.2343              | HOMO-2→LUMO        | 3.50%         |
|                             |                       |                            |                     | <b>HOMO→LUMO</b>   | <b>89.85%</b> |
| 2                           | 3.1660                | 391.61                     | 0.1256              | HOMO-6→LUMO        | 2.95%         |
|                             |                       |                            |                     | <b>HOMO-2→LUMO</b> | <b>71.59%</b> |
|                             |                       |                            |                     | <b>HOMO-1→LUMO</b> | <b>14.33%</b> |
|                             |                       |                            |                     | HOMO→LUMO          | 2.32%         |
|                             |                       |                            |                     | HOMO→LUMO+1        | 2.25%         |
| 3                           | 3.2500                | 381.49                     | 0.3381              | HOMO-6→LUMO        | 4.13%         |
|                             |                       |                            |                     | HOMO-5→LUMO        | 7.84%         |
|                             |                       |                            |                     | HOMO-3→LUMO        | 2.25%         |
|                             |                       |                            |                     | <b>HOMO-2→LUMO</b> | <b>17.27%</b> |
|                             |                       |                            |                     | <b>HOMO-1→LUMO</b> | <b>54.28%</b> |
|                             |                       |                            |                     | HOMO-1→LUMO+2      | 3.22%         |
| 5                           | 3.9277                | 315.66                     | 1.4411              | HOMO-1→LUMO        | 9.96%         |
|                             |                       |                            |                     | HOMO-1→LUMO+3      | 2.17%         |
|                             |                       |                            |                     | <b>HOMO→LUMO+1</b> | <b>74.70%</b> |



|                      |               |        |        |                      |               |
|----------------------|---------------|--------|--------|----------------------|---------------|
| 11                   | 4.4516        | 278.51 | 0.2285 | HOMO-6→LUMO          | 5.54%         |
|                      |               |        |        | HOMO-5→LUMO          | 4.60%         |
|                      |               |        |        | <b>HOMO-4→LUMO</b>   | <b>25.58</b>  |
|                      |               |        |        | HOMO-4→LUMO+2        | 2.57%         |
|                      |               |        |        | <b>HOMO-3→LUMO</b>   | <b>13.60%</b> |
|                      |               |        |        | <b>HOMO→LUMO+2</b>   | <b>29.22%</b> |
|                      |               |        |        | HOMO→LUMO+3          | 4.43%         |
| 14                   | 4.6768        | 265.11 | 0.8102 | HOMO-2→LUMO+2        | 3.69%         |
|                      |               |        |        | <b>HOMO-1→LUMO+1</b> | <b>33.12%</b> |
|                      |               |        |        | HOMO-1→LUMO+5        | 2.14%         |
|                      |               |        |        | <b>HOMO→LUMO+3</b>   | <b>31.09%</b> |
|                      |               |        |        | HOMO→LUMO+5          | 3.31%         |
| 19                   | 4.8717        | 254.50 | 0.4618 | HOMO-15→LUMO         | 2.455%        |
|                      |               |        |        | HOMO-13→LUMO         | 3.89%         |
|                      |               |        |        | HOMO-6→LUMO          | 7.62%         |
|                      |               |        |        | HOMO-5→LUMO          | 8.53%         |
|                      |               |        |        | HOMO-4→LUMO+1        | 4.03%         |
|                      |               |        |        | HOMO-1→LUMO          | 6.35%         |
|                      |               |        |        | <b>HOMO-1→LUMO+2</b> | <b>11.16%</b> |
|                      |               |        |        | <b>HOMO-1→LUMO+3</b> | <b>32.33%</b> |
|                      |               |        |        | HOMO→LUMO+1          | 3.90%         |
| 20                   | 5.0361        | 246.17 | 0.3308 | <b>HOMO-10→LUMO</b>  | <b>42.04%</b> |
|                      |               |        |        | <b>HOMO-6→LUMO</b>   | <b>12.41%</b> |
|                      |               |        |        | HOMO-5→LUMO          | 3.56%         |
|                      |               |        |        | <b>HOMO-2→LUMO+1</b> | <b>20.39%</b> |
|                      |               |        |        | HOMO-2→LUMO+5        | 2.66%         |
| 21                   | 5.0717        | 244.46 | 0.2889 | HOMO→LUMO+5          | 2.10%         |
|                      |               |        |        | <b>HOMO-6→LUMO</b>   | <b>10.62%</b> |
|                      |               |        |        | <b>HOMO-5→LUMO</b>   | <b>10.55%</b> |
|                      |               |        |        | HOMO-3→LUMO+1        | 6.09%         |
|                      |               |        |        | <b>HOMO-2→LUMO+2</b> | <b>12.63%</b> |
|                      |               |        |        | HOMO-2→LUMO+3        | 6.88%         |
|                      |               |        |        | HOMO-1→LUMO+1        | 6.21%         |
|                      |               |        |        | HOMO→LUMO+2          | 4.74%         |
| 31                   | 5.6479        | 219.52 | 0.1270 | <b>HOMO→LUMO+5</b>   | <b>10.77%</b> |
|                      |               |        |        | <b>HOMO→LUMO+7</b>   | <b>10.77%</b> |
|                      |               |        |        | HOMO-15→LUMO         | 2.52%         |
|                      |               |        |        | HOMO-13→LUMO         | 3.80%         |
|                      |               |        |        | HOMO-6→LUMO+1        | 5.77%         |
|                      |               |        |        | HOMO-5→LUMO+2        | 2.27%         |
|                      |               |        |        | <b>HOMO-4→LUMO+1</b> | <b>39.38%</b> |
| <b>HOMO-1→LUMO+3</b> | <b>12.19%</b> |        |        |                      |               |
| <b>HOMO-1→LUMO+5</b> | <b>10.36%</b> |        |        |                      |               |

## 8. Complexation measurements of 18-21 with HBT

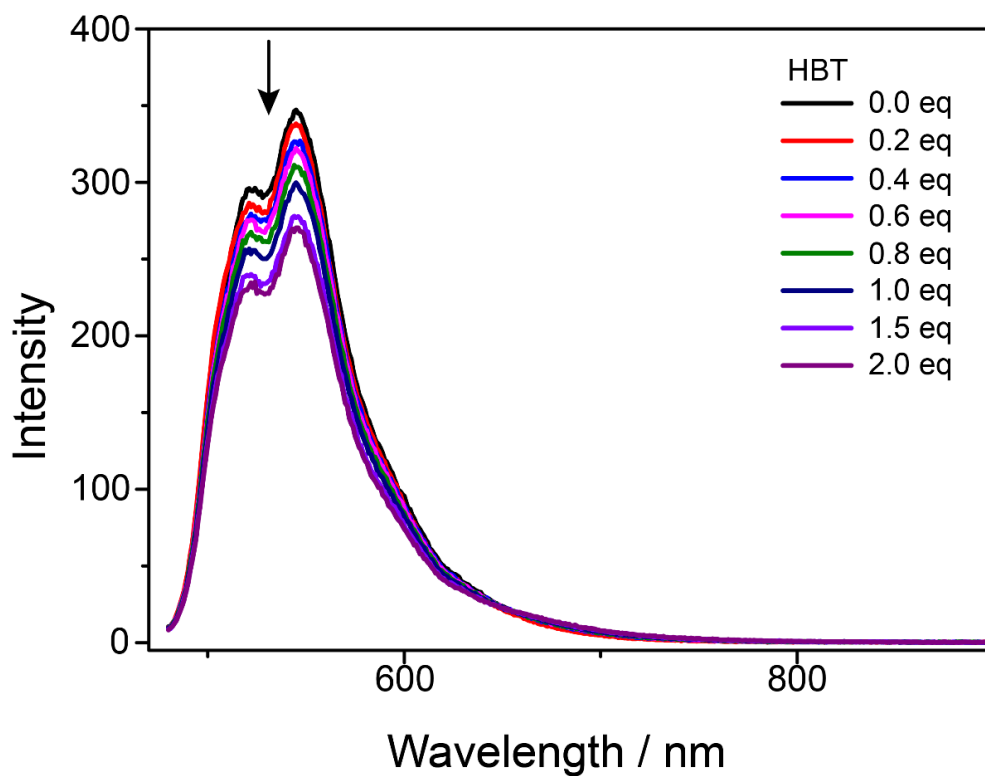

Figure S55. Emission spectra of **18** in toluene ( $1 \times 10^{-4} \text{ mol L}^{-1}$ ) in the presence of HBT.

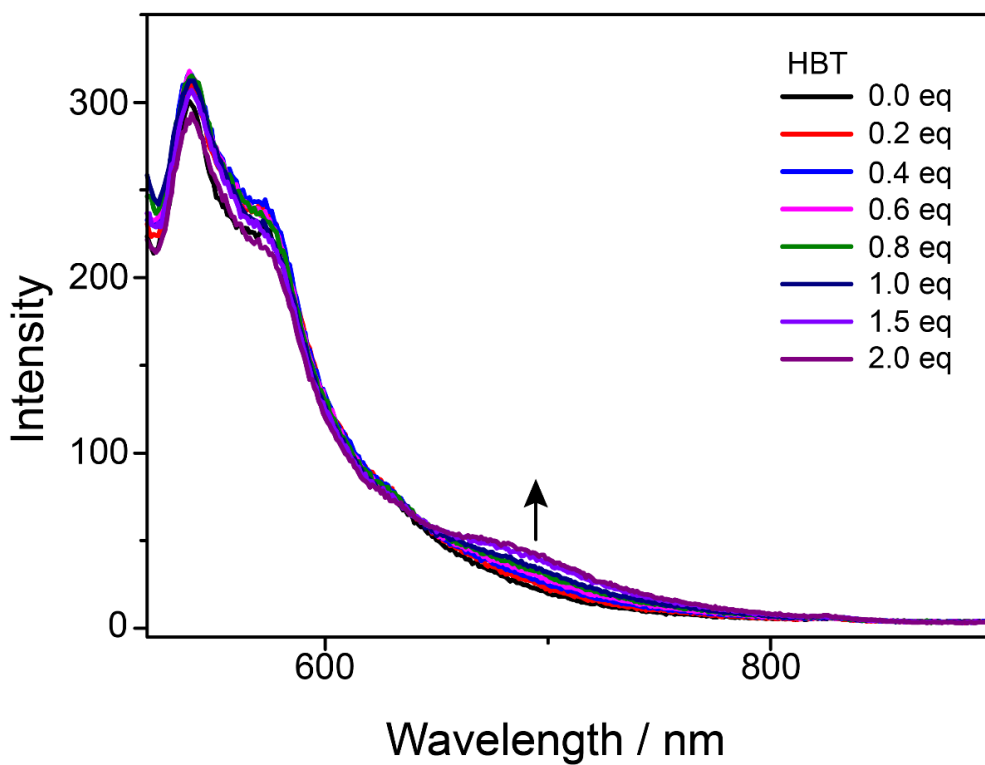

Figure S56. Emission spectra of **19** in toluene ( $1 \times 10^{-4} \text{ mol L}^{-1}$ ) in the presence of HBT.

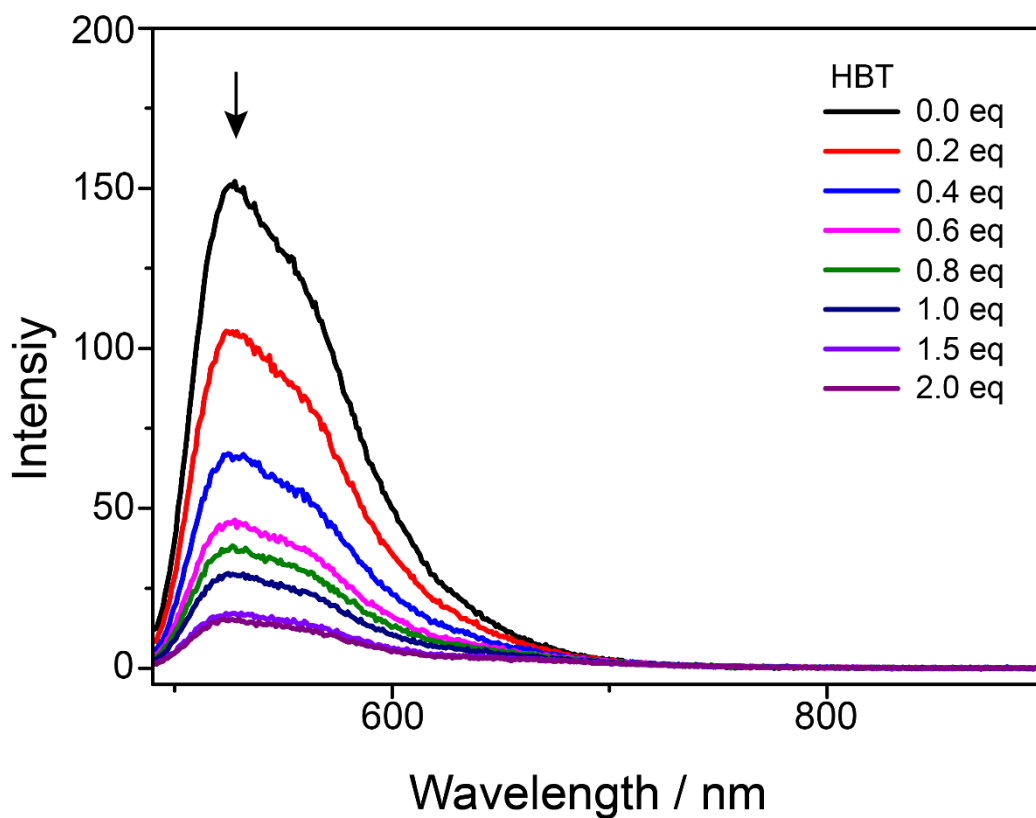

Figure S57. Emission spectra of **20** in toluene ( $1 \times 10^{-4}$  mol L<sup>-1</sup>) in the presence of **HBT**.

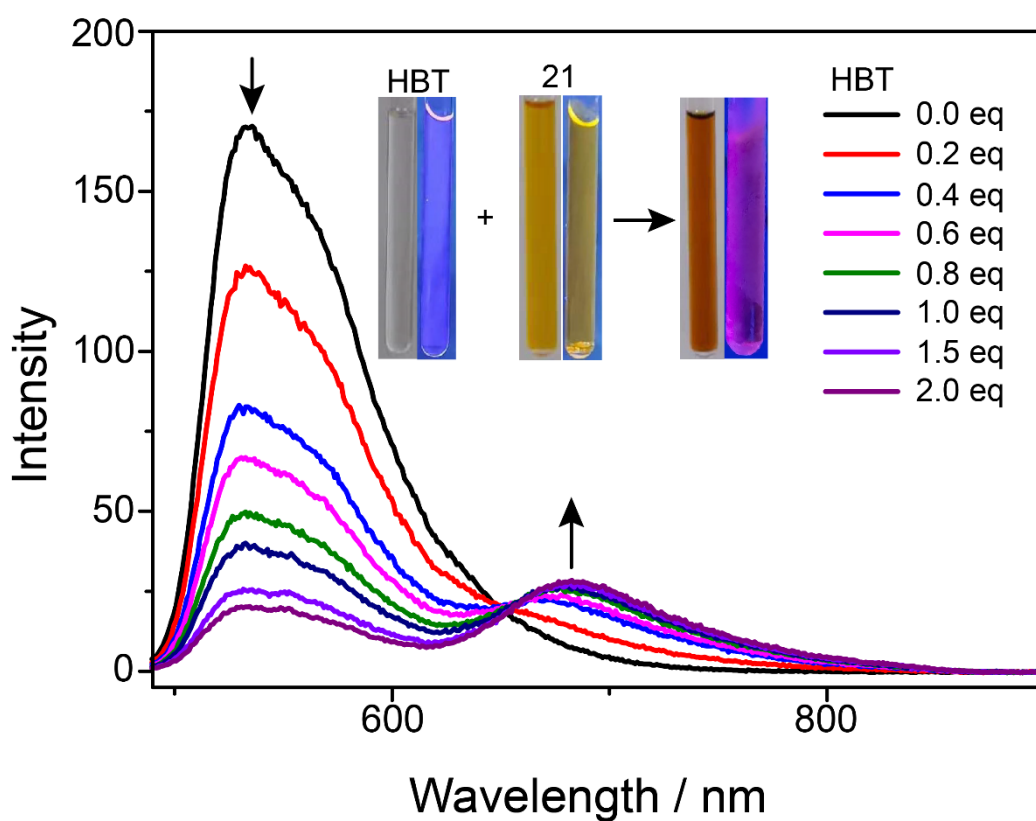

Figure S58. Emission spectra of **21** in toluene ( $1 \times 10^{-4}$  mol L<sup>-1</sup>) in the presence of **HBT**.

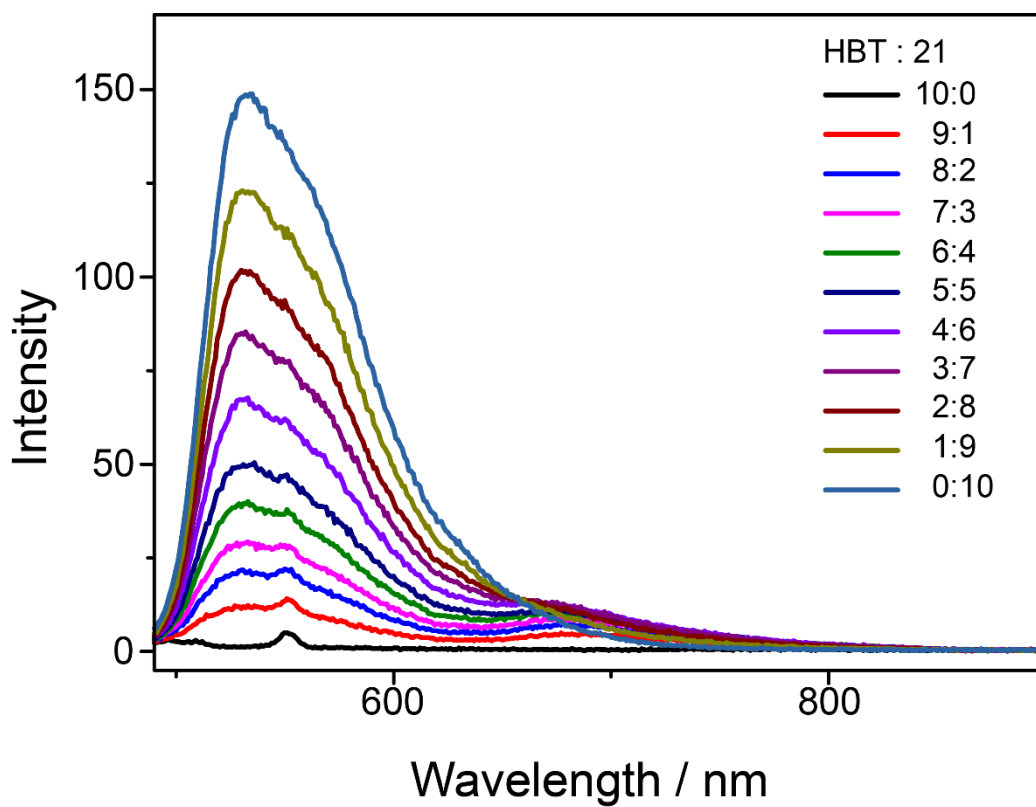

Figure S59. The Job-plot for complex **21**·**HBT** in toluene solution ( $c[\mathbf{21}] + c[\mathbf{HBT}] = 1 \times 10^{-4} \text{ mol L}^{-1}$ ).

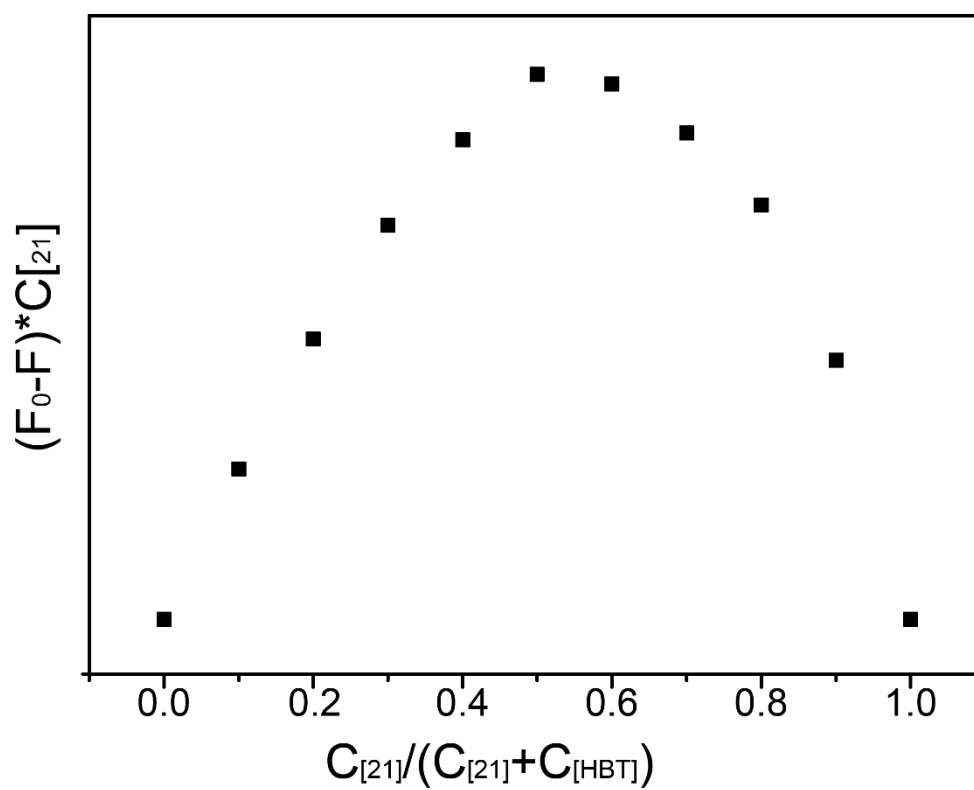

Figure S60. The combination ratio of **21** and **HBT** is 1 : 1.

a)

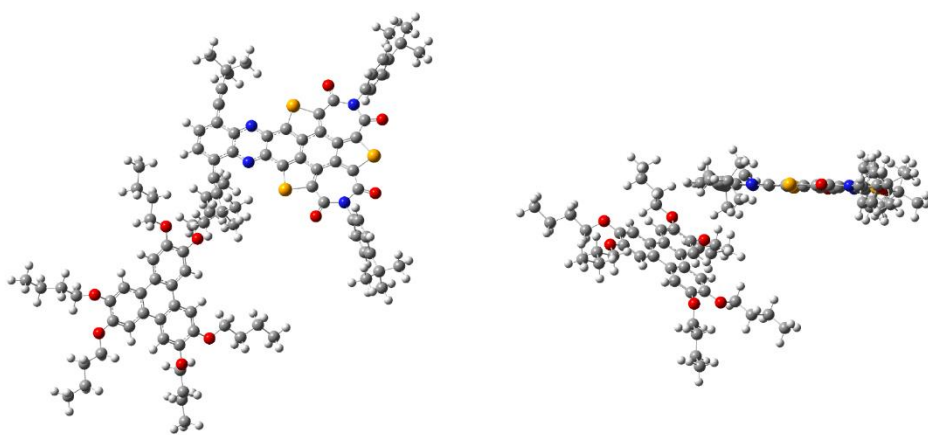

$$\Delta G(\text{mix}) = 3.2 \text{ Kcal / mol}$$

b)

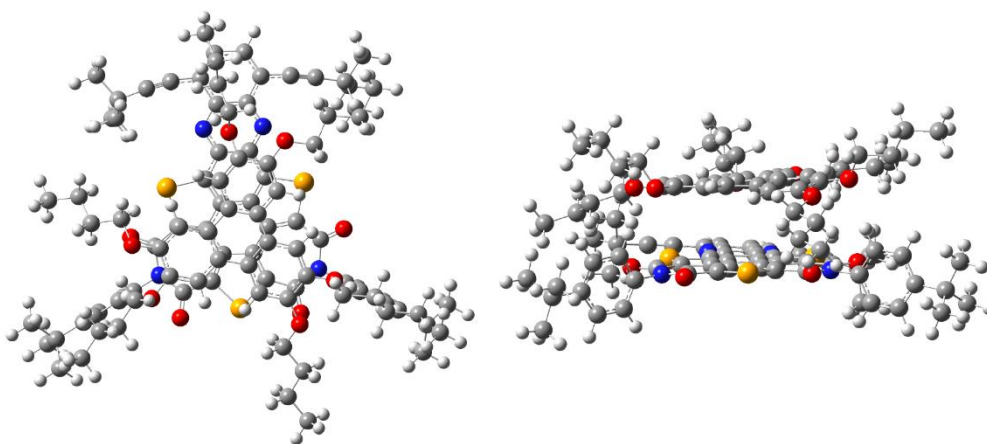

$$\Delta G(\text{mix}) = -25.0 \text{ Kcal / mol}$$

c)

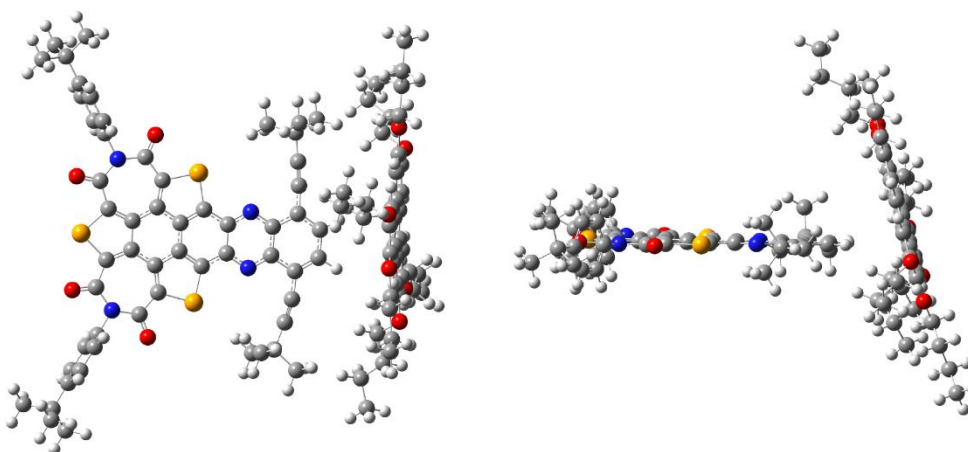

$$\Delta G(\text{mix}) = 1.1 \text{ Kcal / mol}$$

**Figure S61.** Optimized geometries of three possible structures of **21•HBT**

**Table S20.** The calculated energy levels for the frontier orbitals for compounds **HBT**, **21**, **21-HBT**.

| Compound      | Energy levels / eV |       |       |        |             |
|---------------|--------------------|-------|-------|--------|-------------|
|               | HOMO-1             | HOMO  | LUMO  | LUMO+1 | $E_g^{[a]}$ |
| <b>HBT</b>    | -5.08              | -5.08 | -0.49 | -0.49  | 4.59        |
| <b>21</b>     | -6.23              | -5.75 | -3.03 | -2.73  | 2.72        |
| <b>21-HBT</b> | 5.19               | -5.18 | -2.84 | -2.53  | 2.34        |

$[a]E_g = E_{LUMO} - E_{HOMO}$

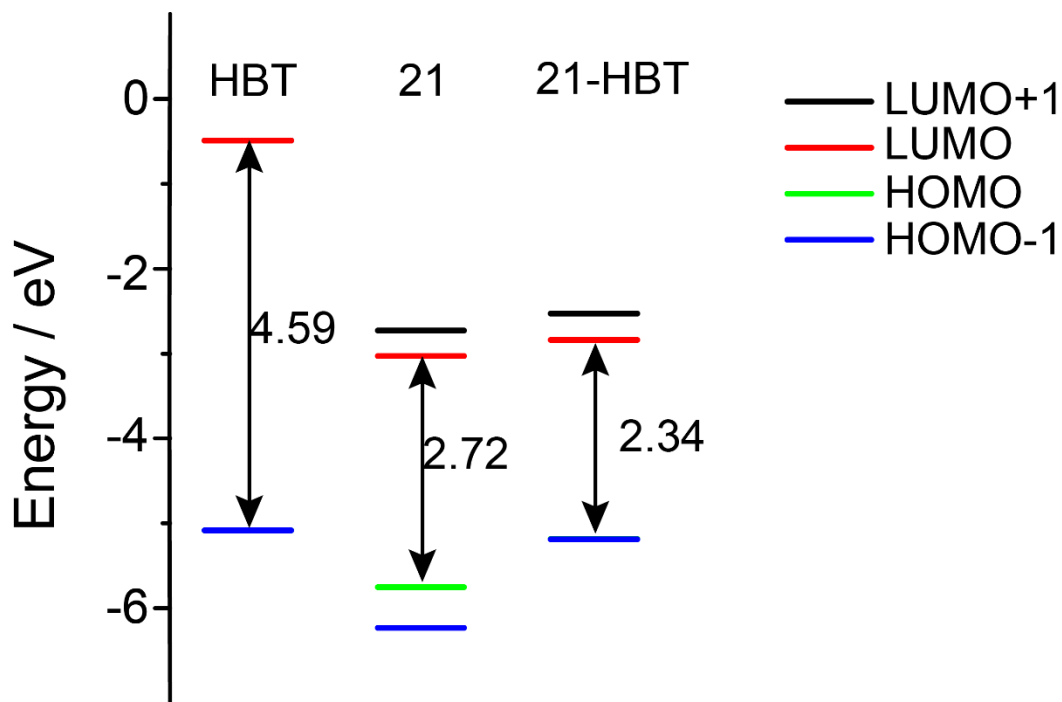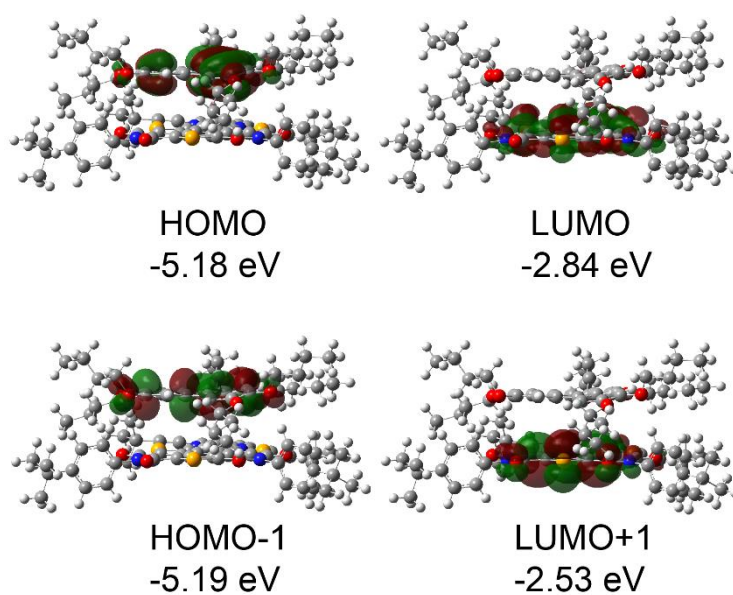

**Figure S63.** Calculated molecular orbitals of compounds **21-HBT**.

## 9. References:

- [S1] W. L. F. Armarege, C. L. L. Chai., Purification of Laboratory Chemicals, 5<sup>th</sup> ed.
- [S2] a) X. Li, Y. Zhu, J. Shao, B. Wang, S. Zhang, Y. Shao, X. Jin, X. Yao, R. Fang, X. Shao, *Angew. Chem. Int. Ed.*, **2014**, *53*, 535; b) X. Hou, J. Sun, Z. Liu, C. Yan, W. Song, H. Zhang, S. Zhou, X. Shao, *Chem. Commun.* **2018**, *54*, 10981.c) X. Li, Y. Zhu, J. Shao, L.Chen, S. Zhao, B. wang, S. Zhang, Y. Shao, H. Zhang, X. Shao, *Angew. Chem. Int. Ed.*, **2015**, *54*, 267;d) Y. Sun, X. Li, C. Sun, X. Hou, D. Lin, H. Zhang, C. Di, D. Zhu, X. Shao, *Angew. Chem. Int. Ed.*, **2017**, *56*, 13470.
- [S3] M. C. Burla, R. Caliandro., M. Camalli, B. Carrozzini, G. L. Cascarano, L. de Caro, C. Giacovazzo, G. Polidori, R. Spagna, *J. Appl. Cryst.* **2005**, *38*, 381.
- [S4] G. M. Sheldrick, *SHELXL-97, A Program for Crystal Structure Refinement*, University of Göttingen, Göttingen, Germany, **1997**.
- [S5] M. J. Frisch, G. W. Trucks, H. B. Schlegel, G. E. Scuseria, M. A. Robb, J. R. Cheeseman, G. Scalmani, V. Barone, G. A. Petersson, H. Nakatsuji, X. Li, M. Caricato, A. V. Marenich, J. Bloino, B. G. Janesko, R. Gomperts, B. Mennucci, H. P. Hratchian, J. V. Ortiz, A. F. Izmaylov, J. L. Sonnenberg, D. Williams-Young, F. Ding, F. Lipparini, F. Egidi, J. Goings, B. Peng, A. Petrone, T. Henderson, D. Ranasinghe, V. G. Zakrzewski, J. Gao, N. Rega, G. Zheng, W. Liang, M. Hada, M. Ehara, K. Toyota, R. Fukuda, J. Hasegawa, M. Ishida, T. Nakajima, Y. Honda, O. Kitao, H. Nakai, T. Vreven, K. Throssell, J. A. Montgomery, Jr., J. E. Peralta, F. Ogliaro, M. J. Bearpark, J. J. Heyd, E. N. Brothers, K. N. Kudin, V. N. Staroverov, T. A. Keith, R. Kobayashi, J. Normand, K. Raghavachari, A. P. Rendell, J. C. Burant, S. S. Iyengar, J. Tomasi, M. Cossi, J. M. Millam, M. Klene, C. Adamo, R. Cammi, J. W. Ochterski, R. L. Martin, K. Morokuma, O. Farkas, J. B. Foresman, D. J. Fox, *Gaussian 16, Revision A.03*, Gaussian, Inc., Wallingford CT, **2016**.
- [S6] a) A. D. Becke, *J. Chem. Phys.* **1993**, *98*, 5648; b) C. Lee, W. Yang, R. G. Parr, *Phys. Rev. B.* **1988**, *37*, 785.
- [S7] J. Tomasi, B. Mennucci, R. Cammi, *Chem. Rev.* **2005**, *105*, 2999.
- [S8] G. A. Andrienko, Chemcraft, Version 1.8 (built 523b);
- [S9] T. Lu, F. Chen, *J. Comput. Chem.* **2012**, *33*, 580.

## 10. <sup>1</sup>H NMR, <sup>13</sup>C NMR and IR Spectra of Products

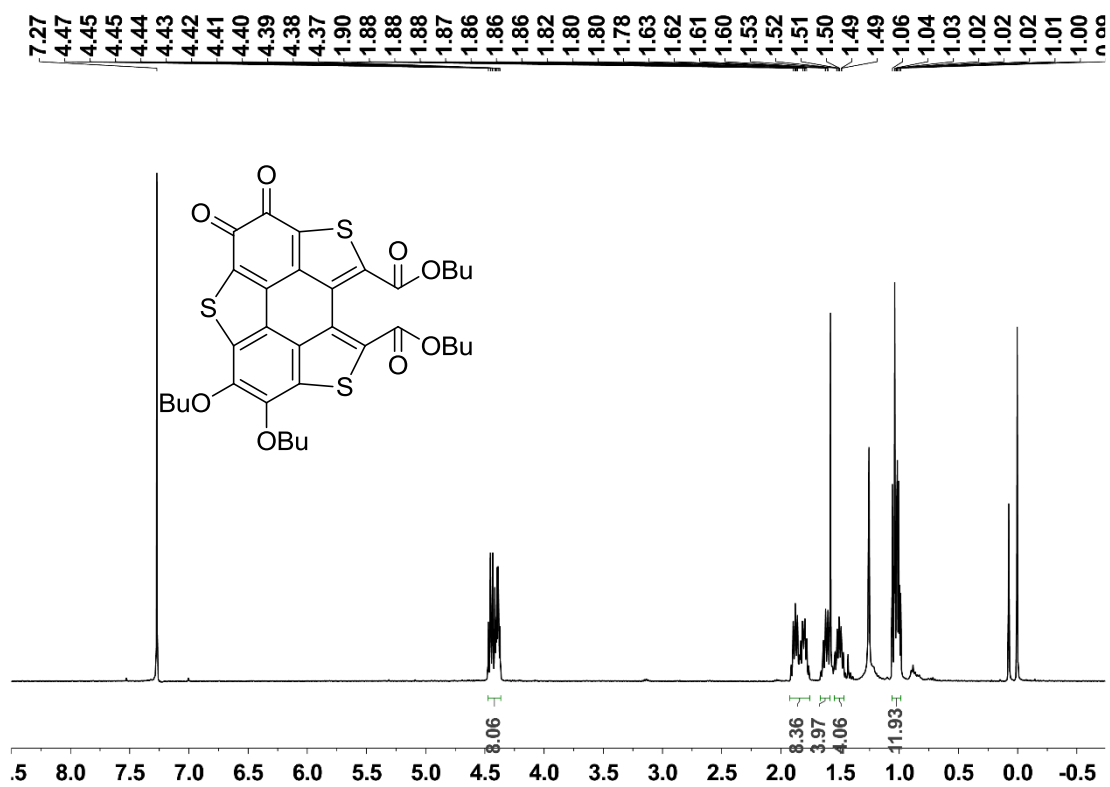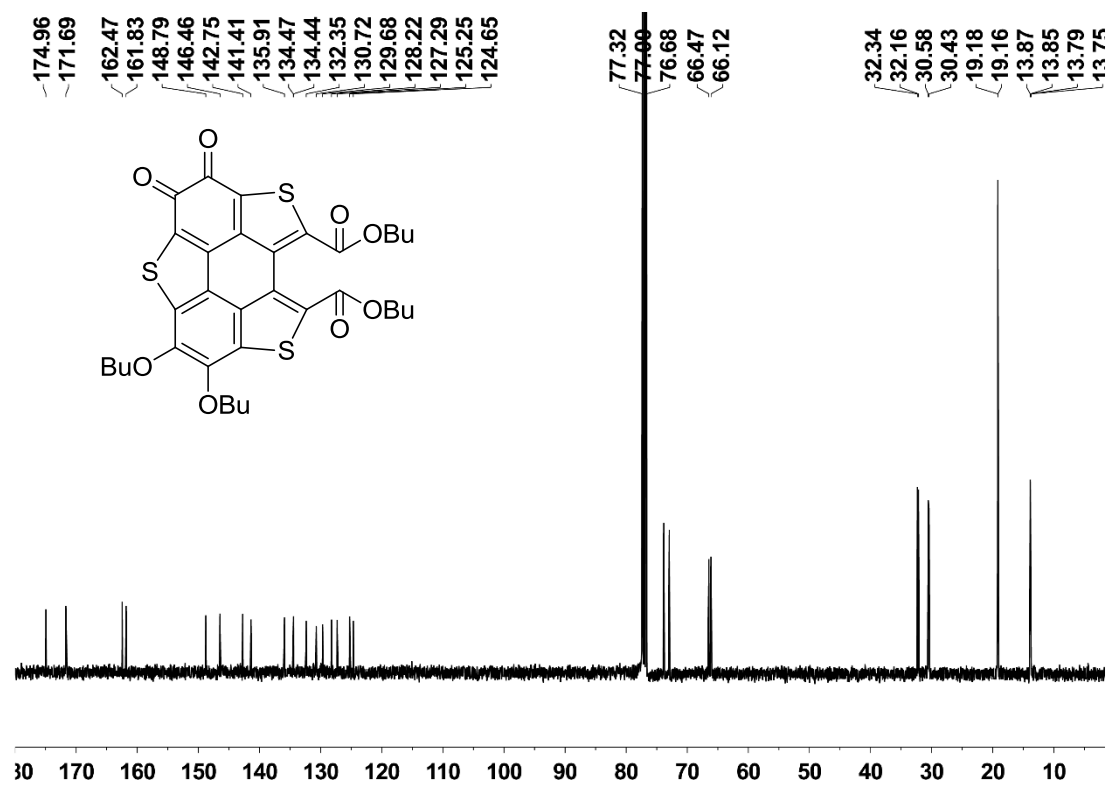



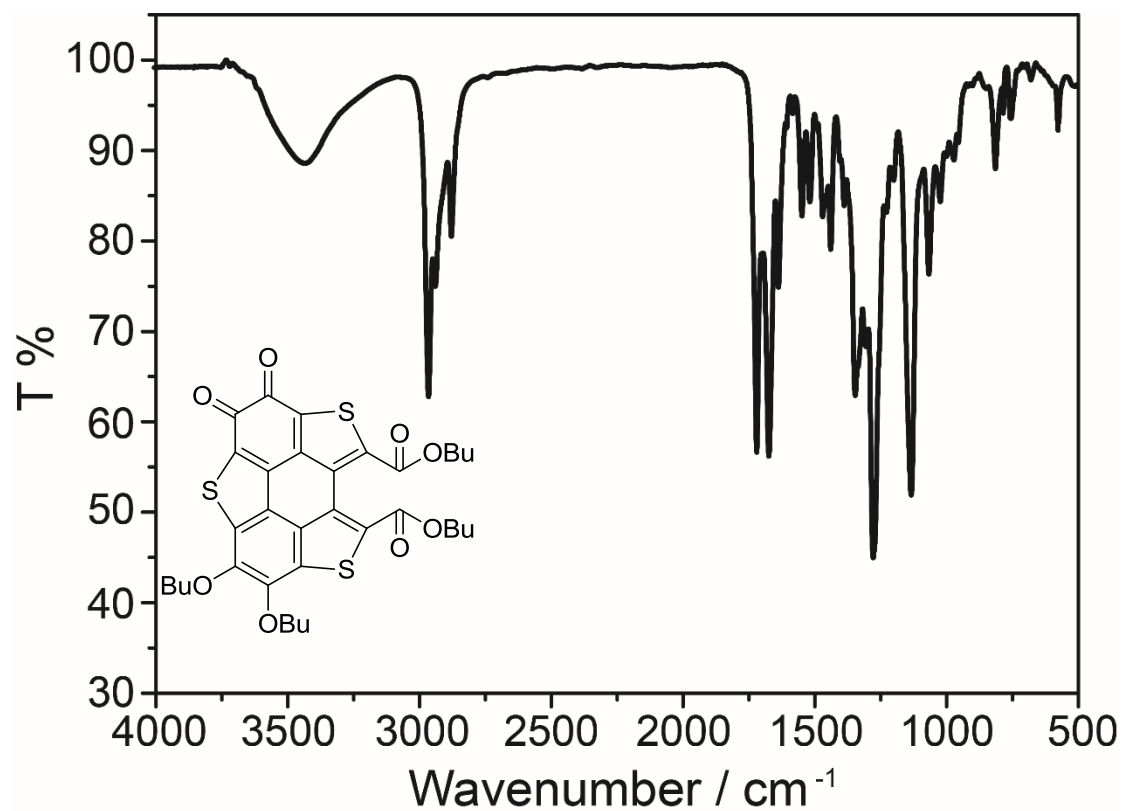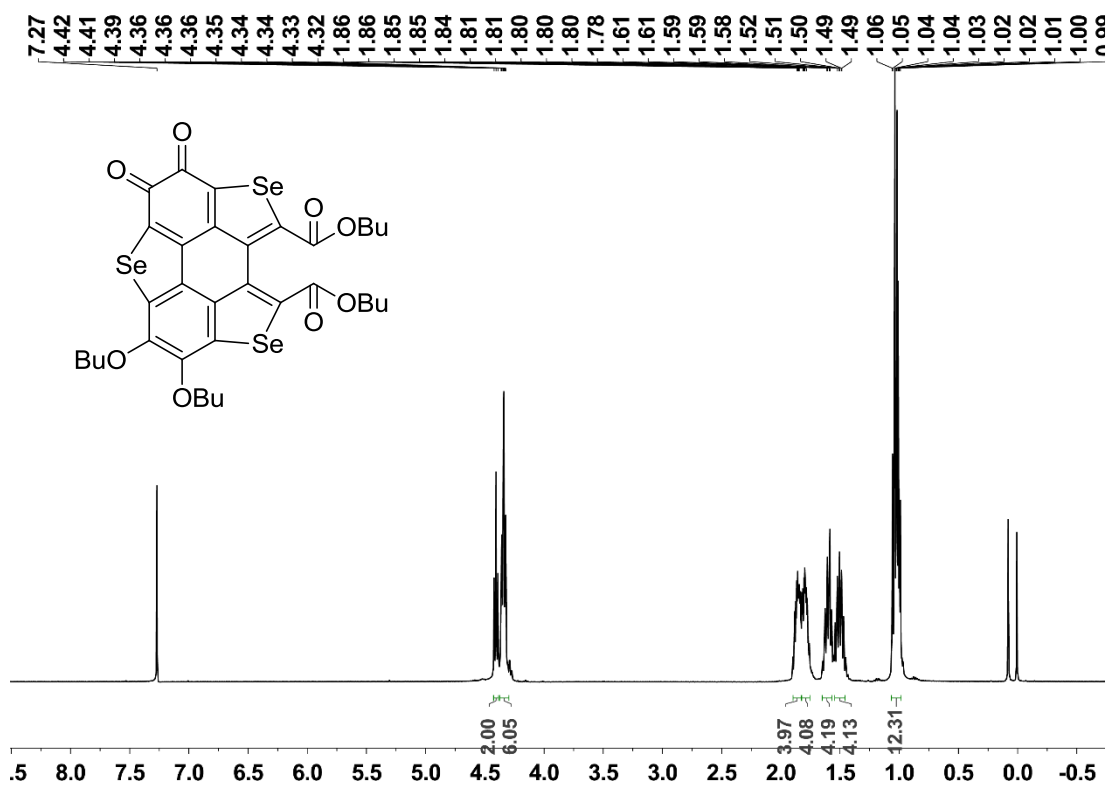

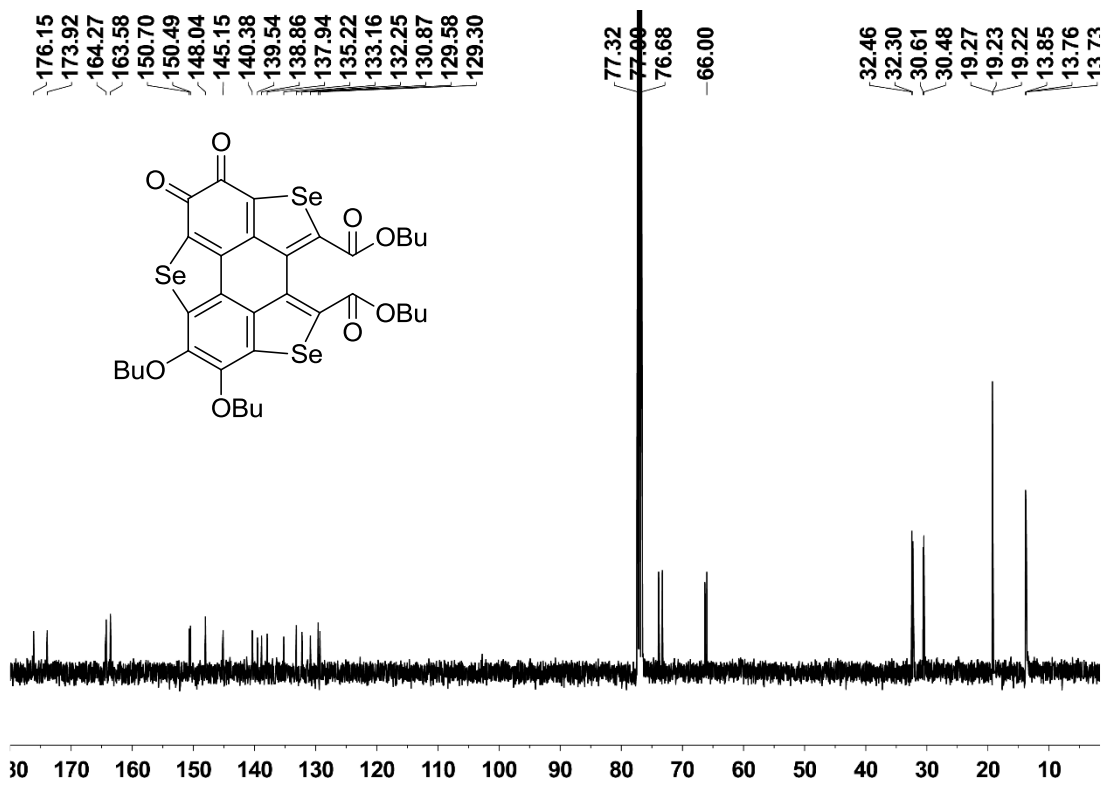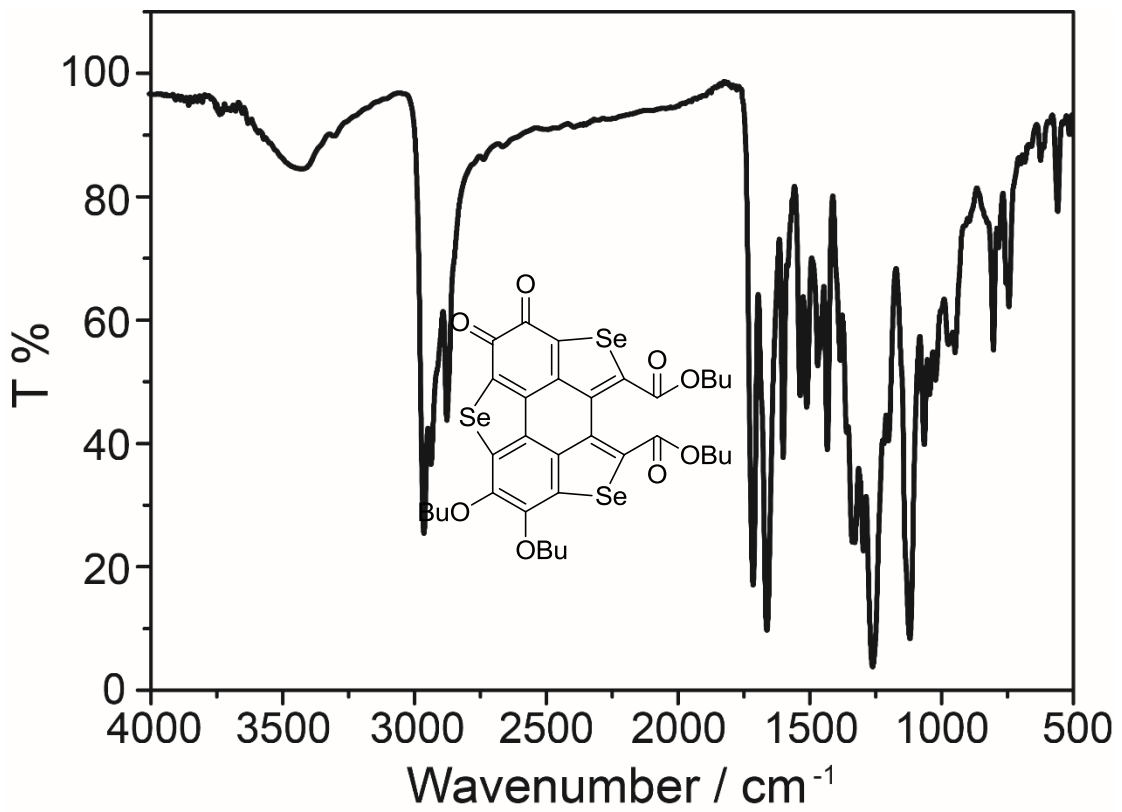

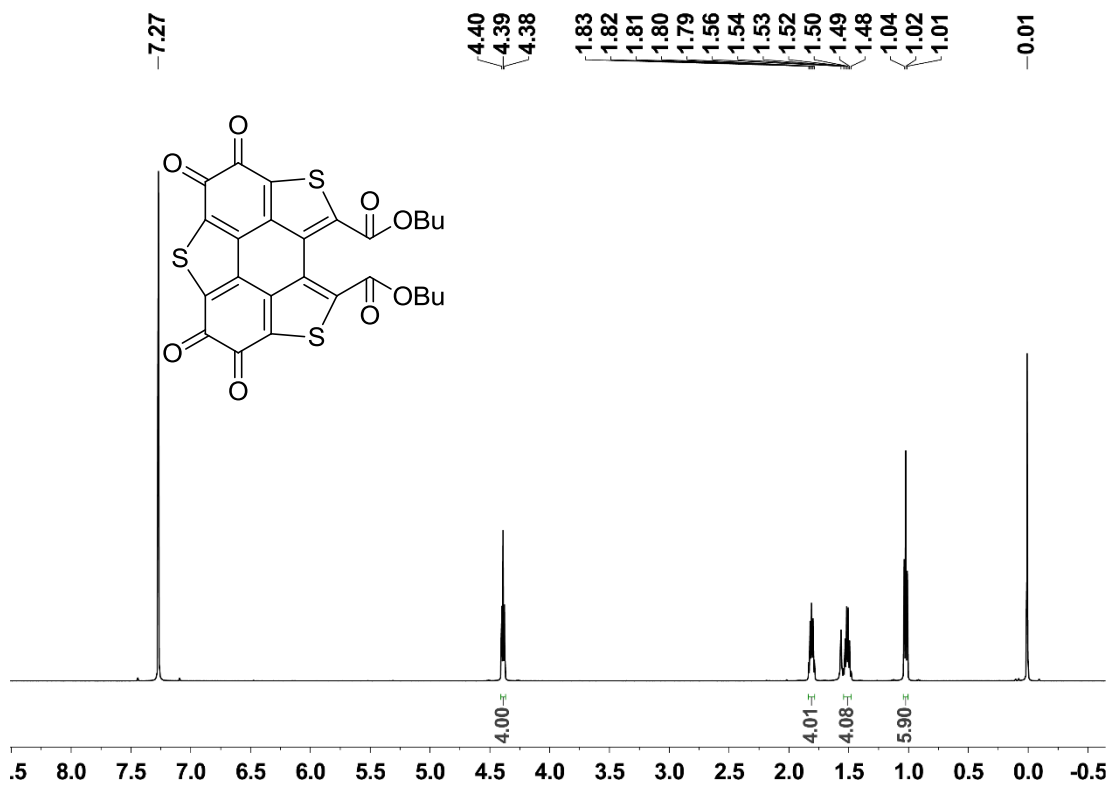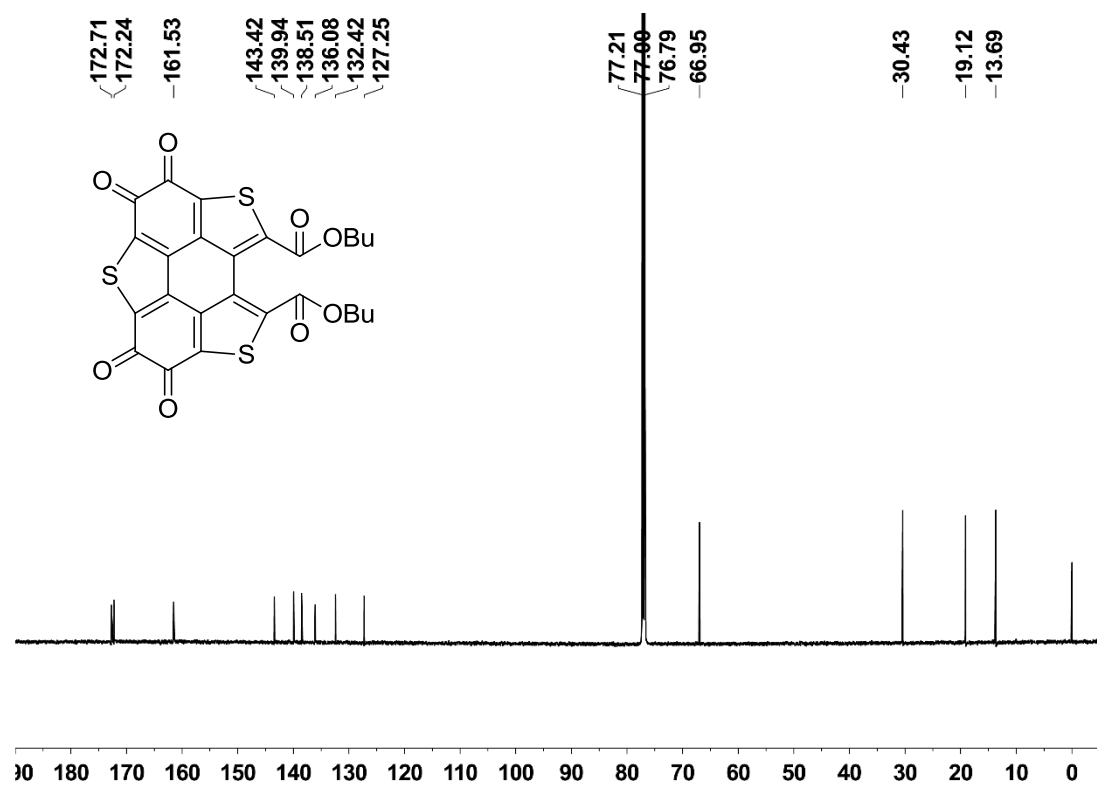

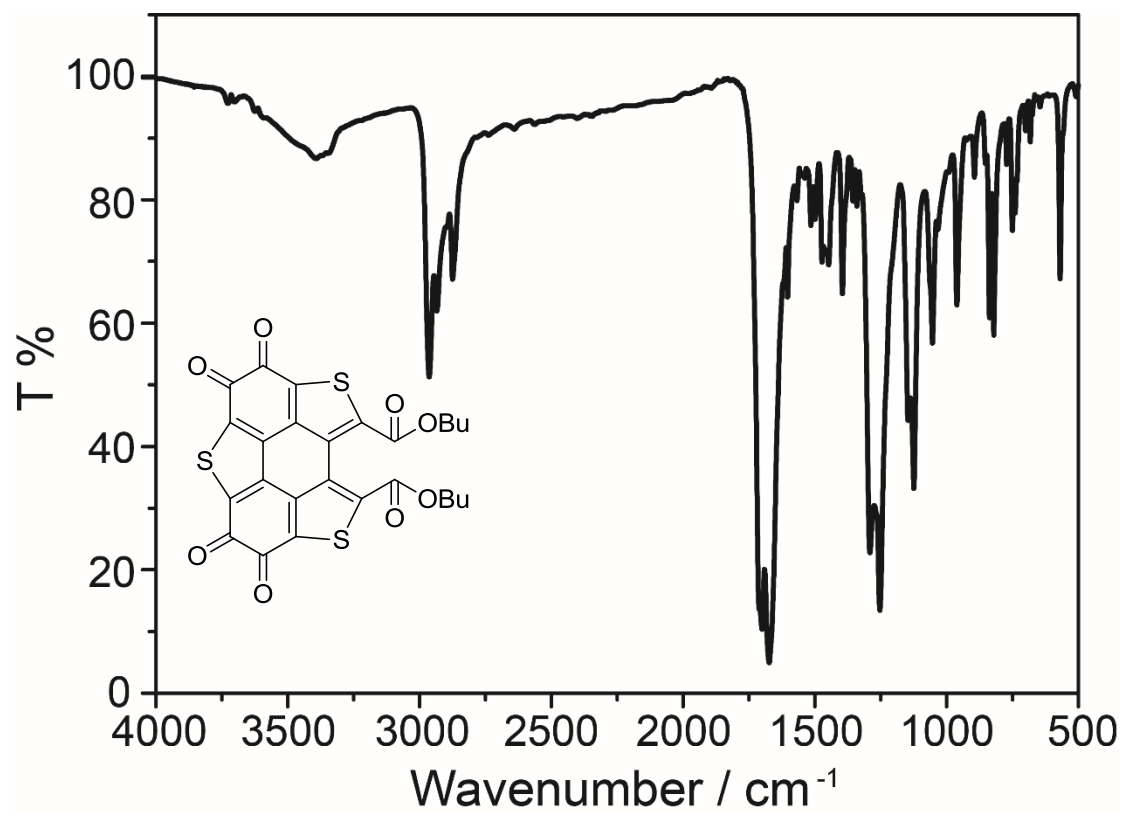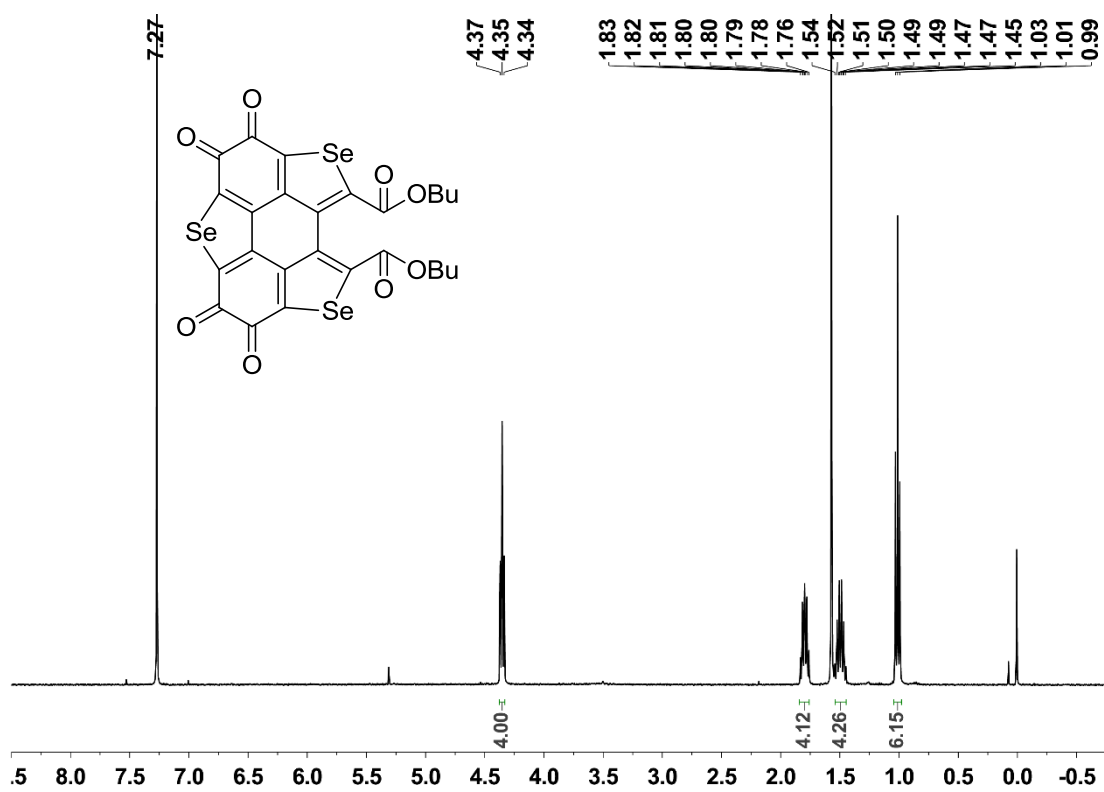

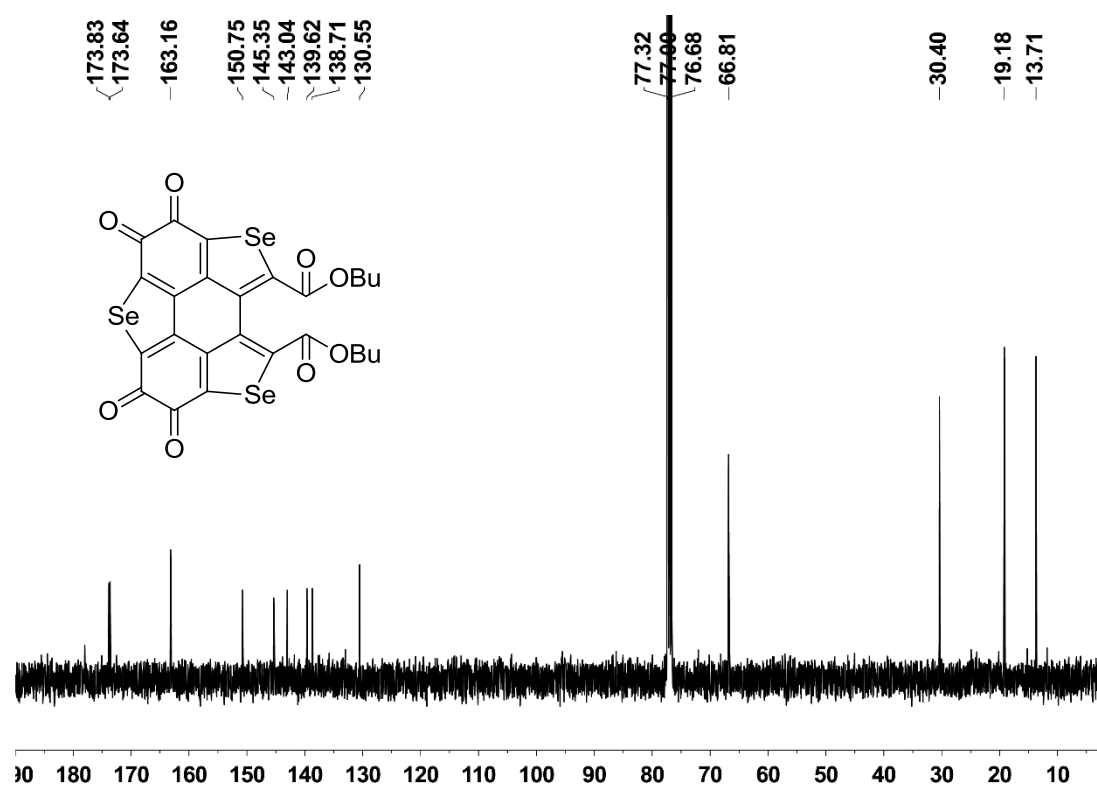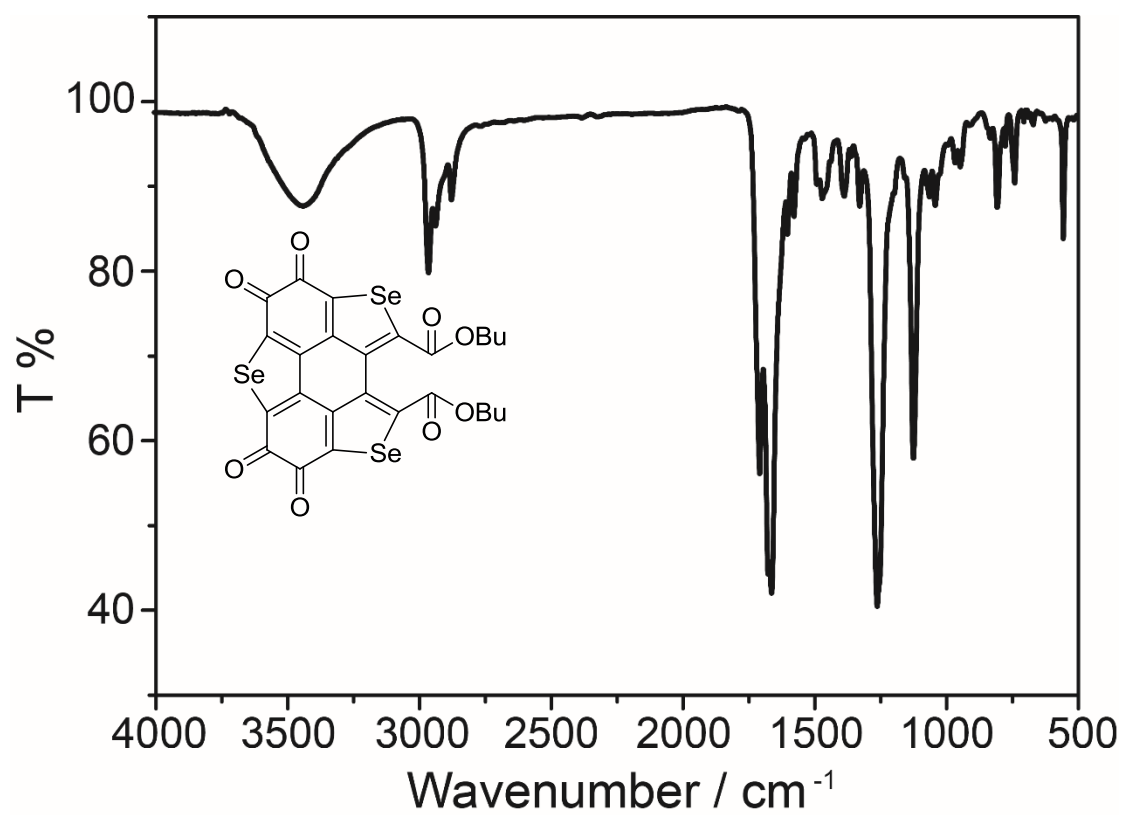

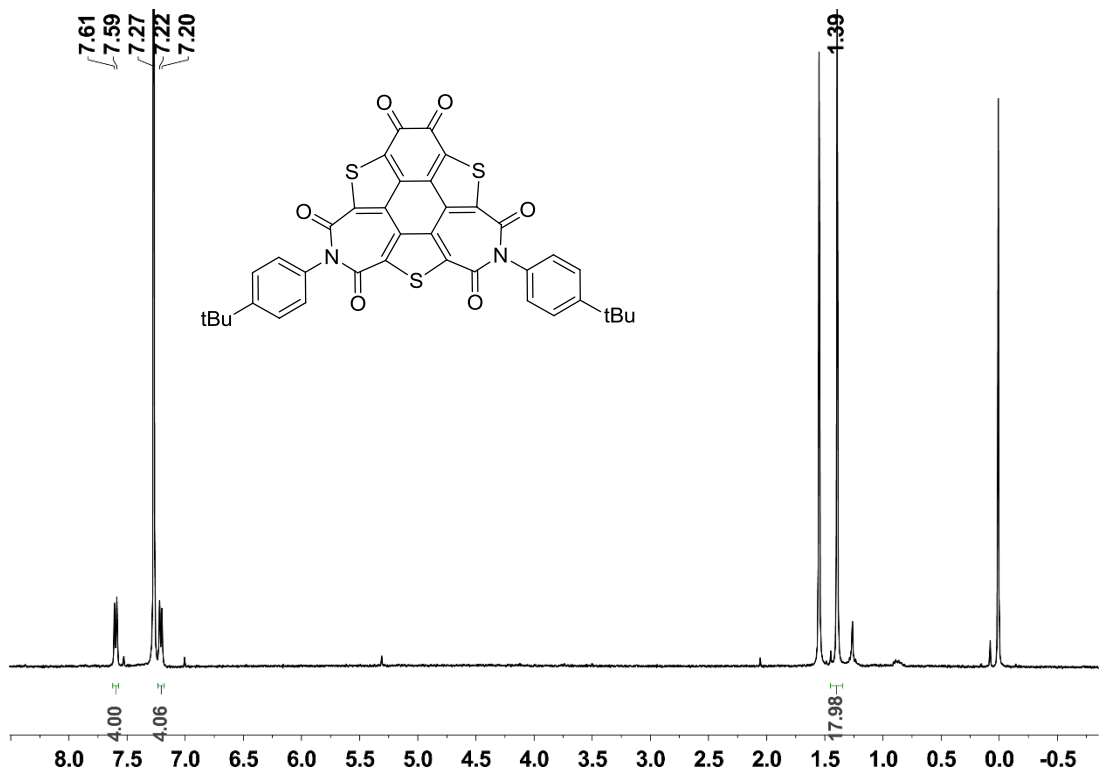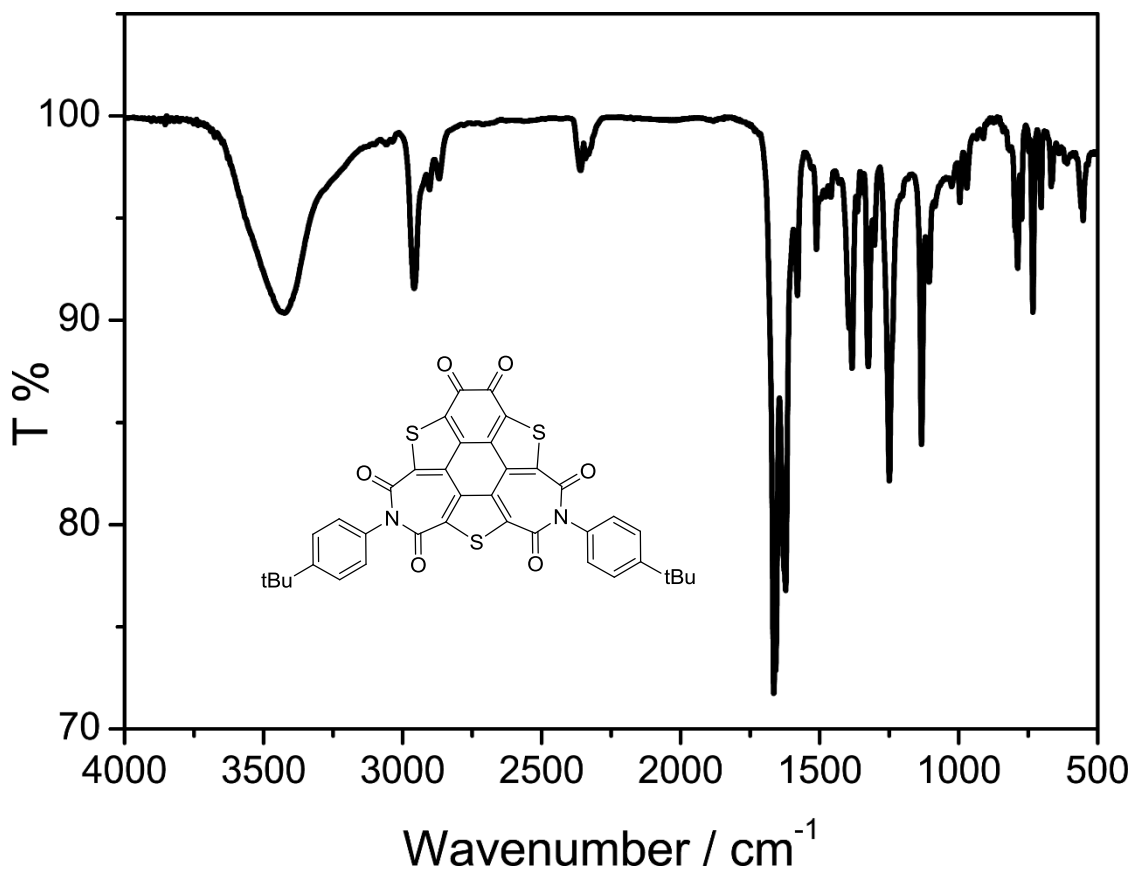

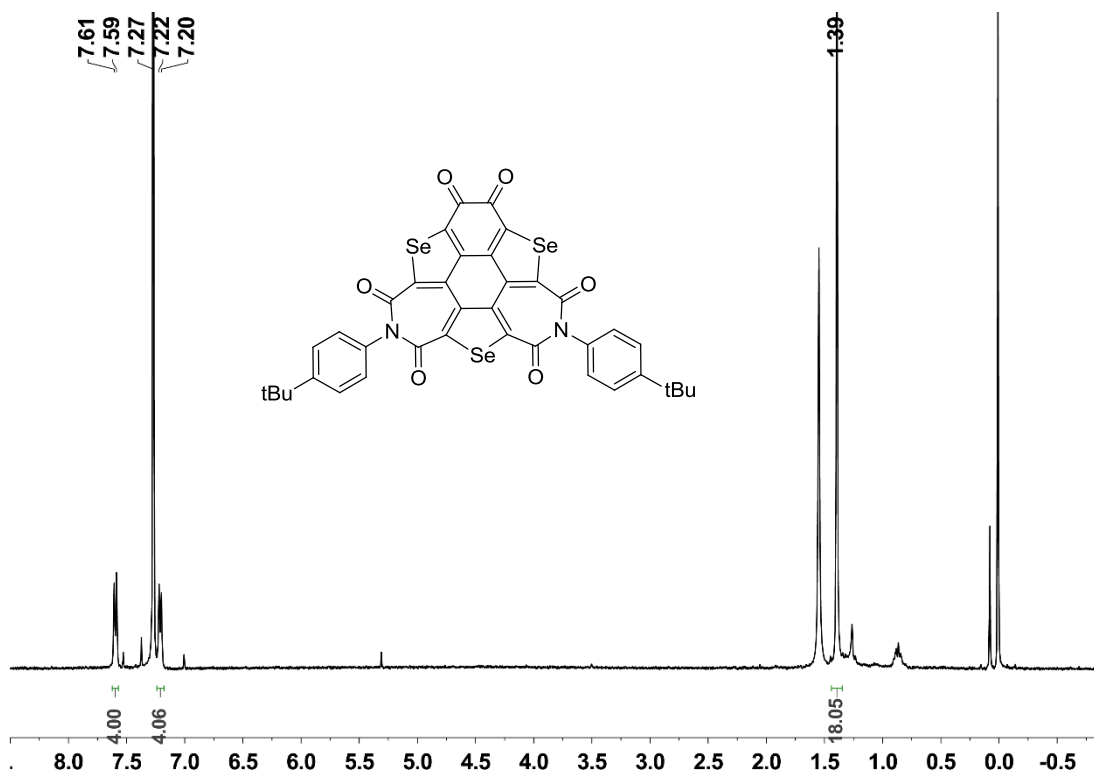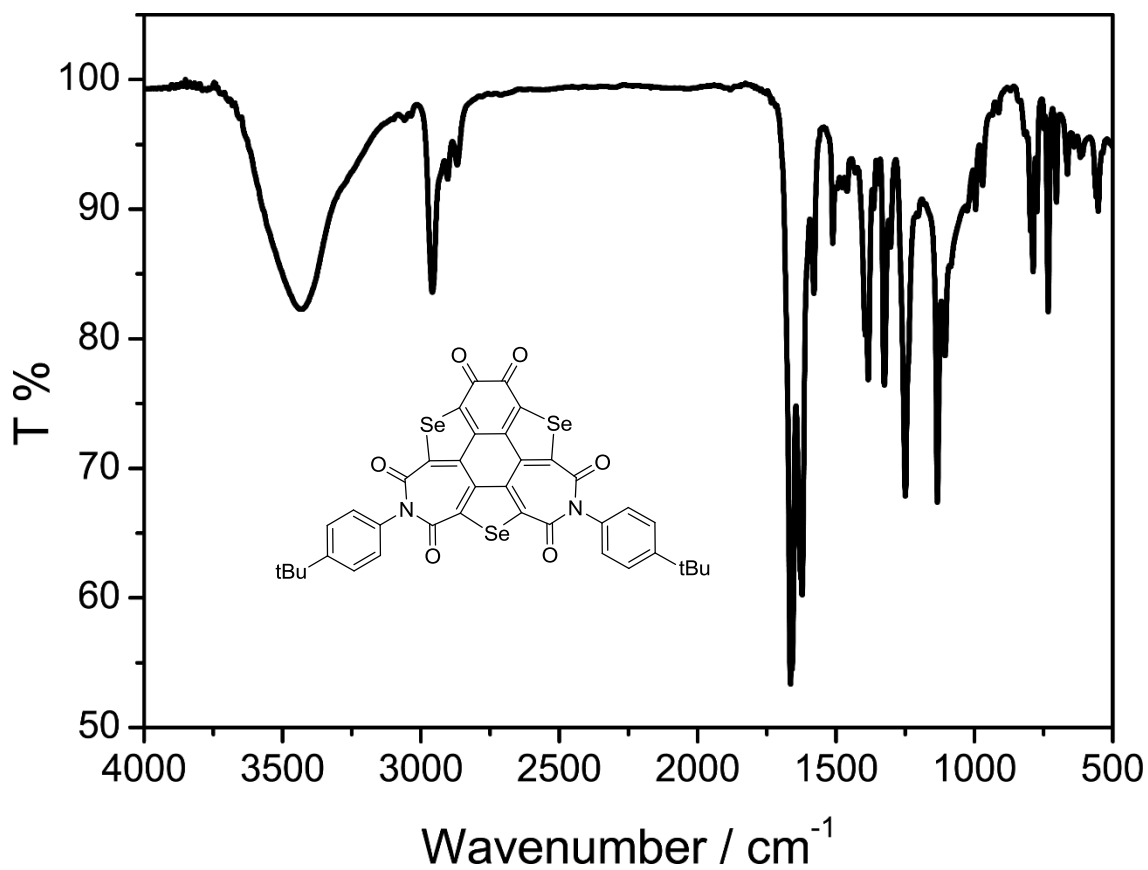

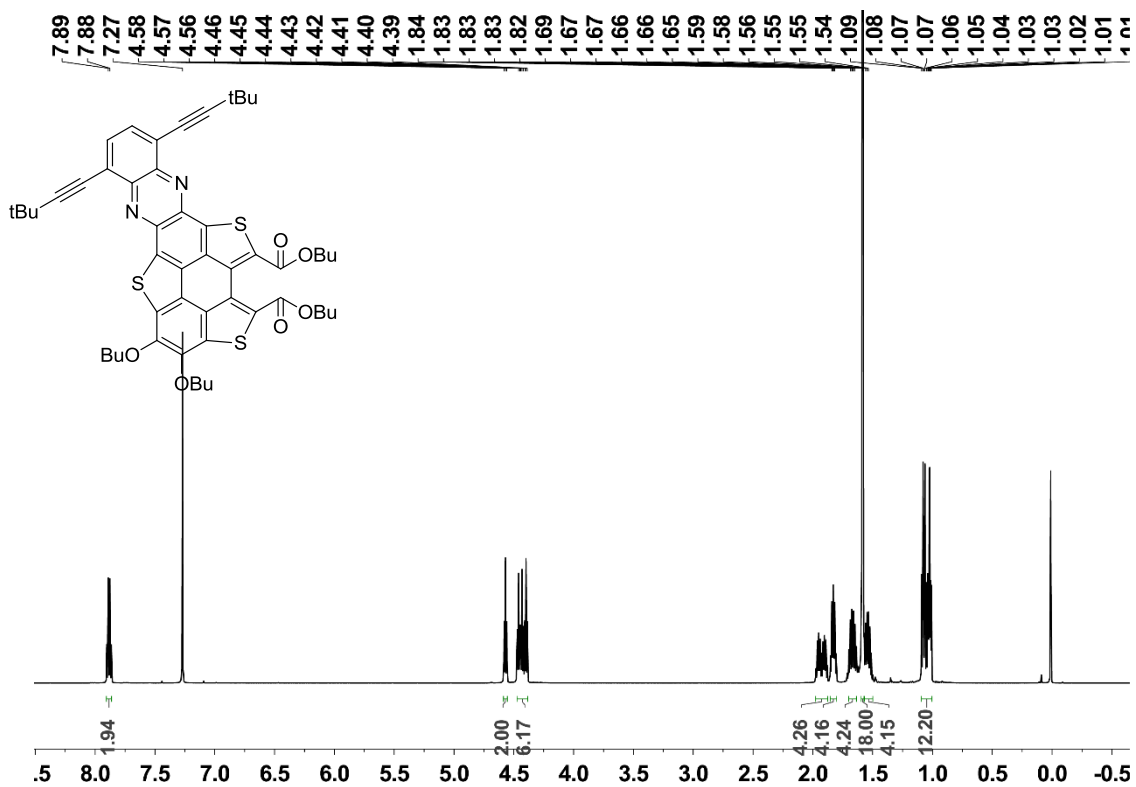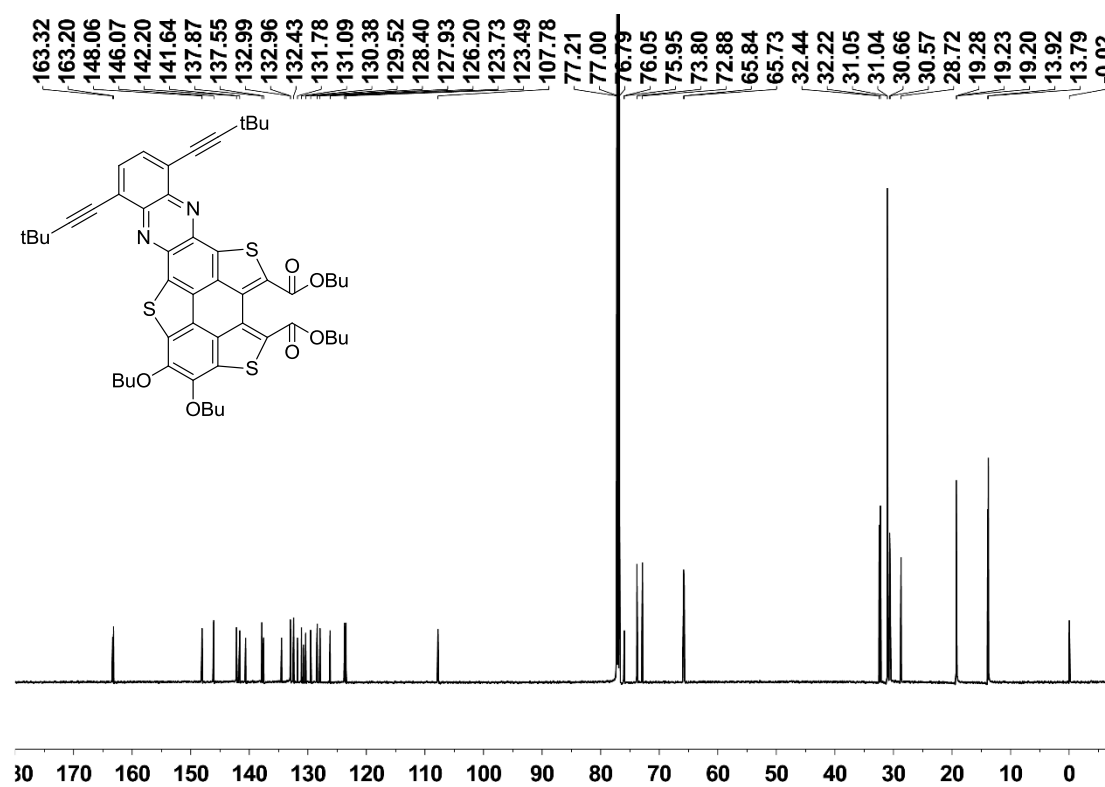



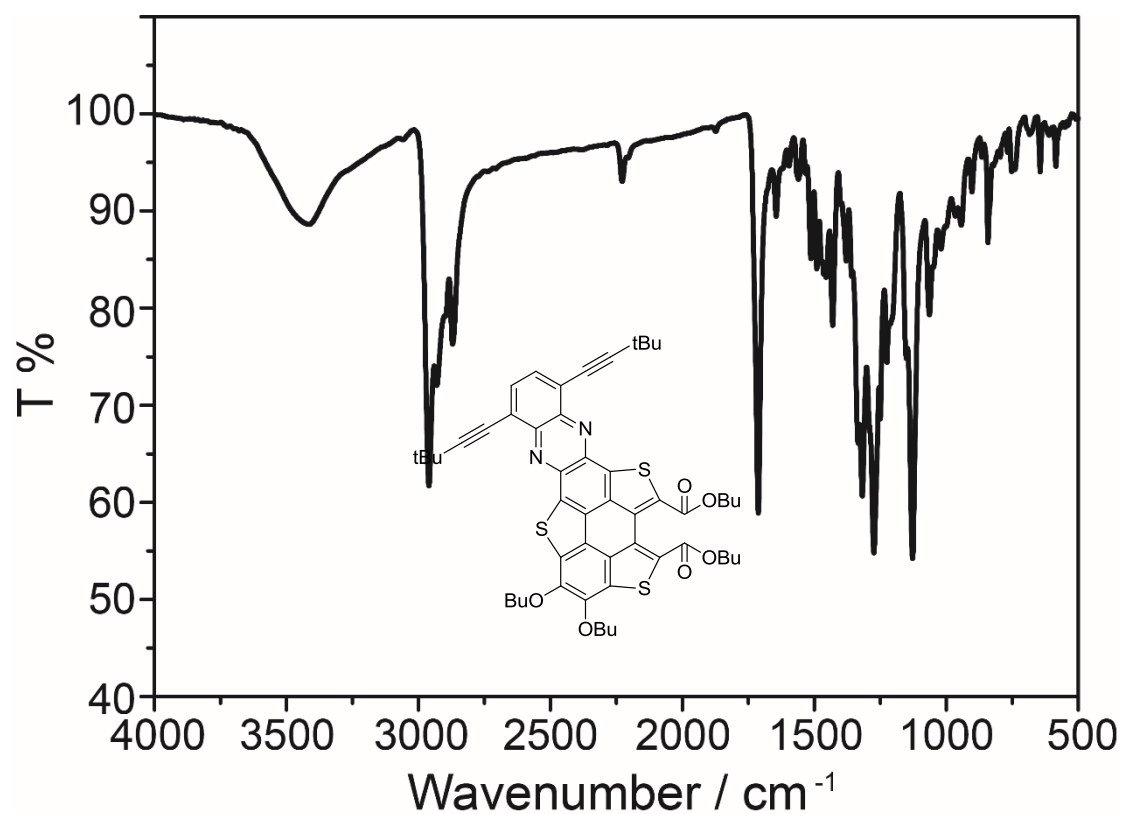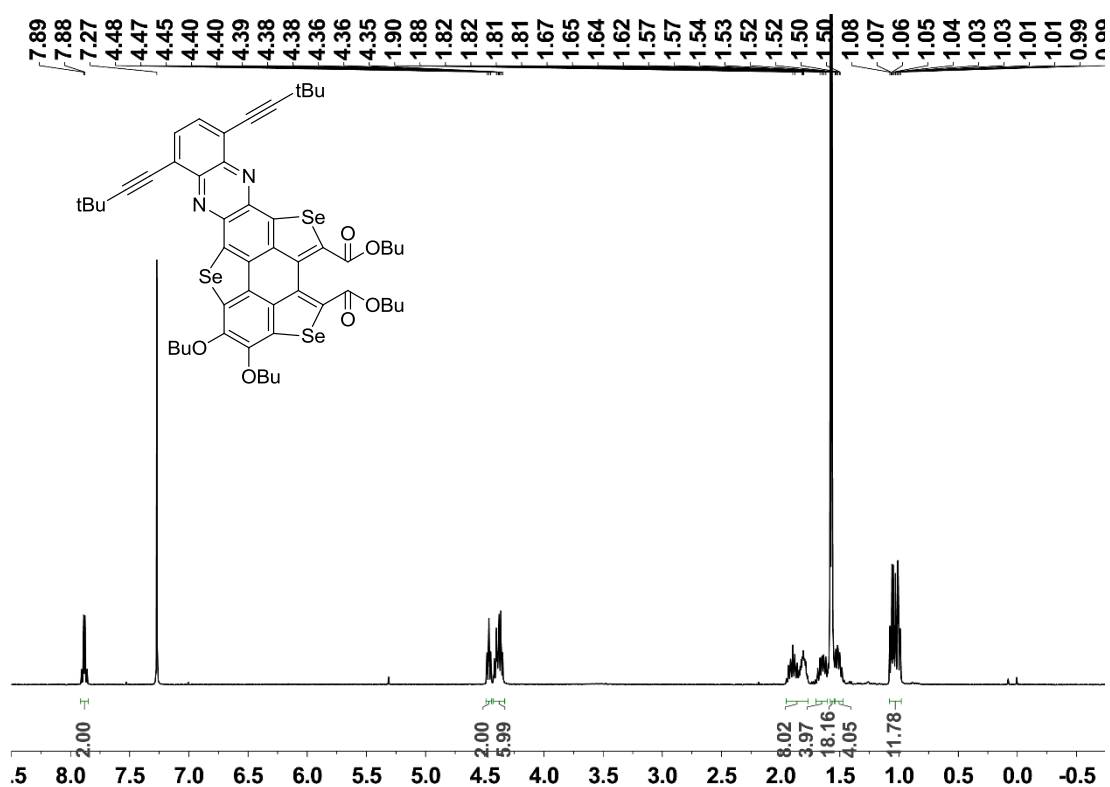

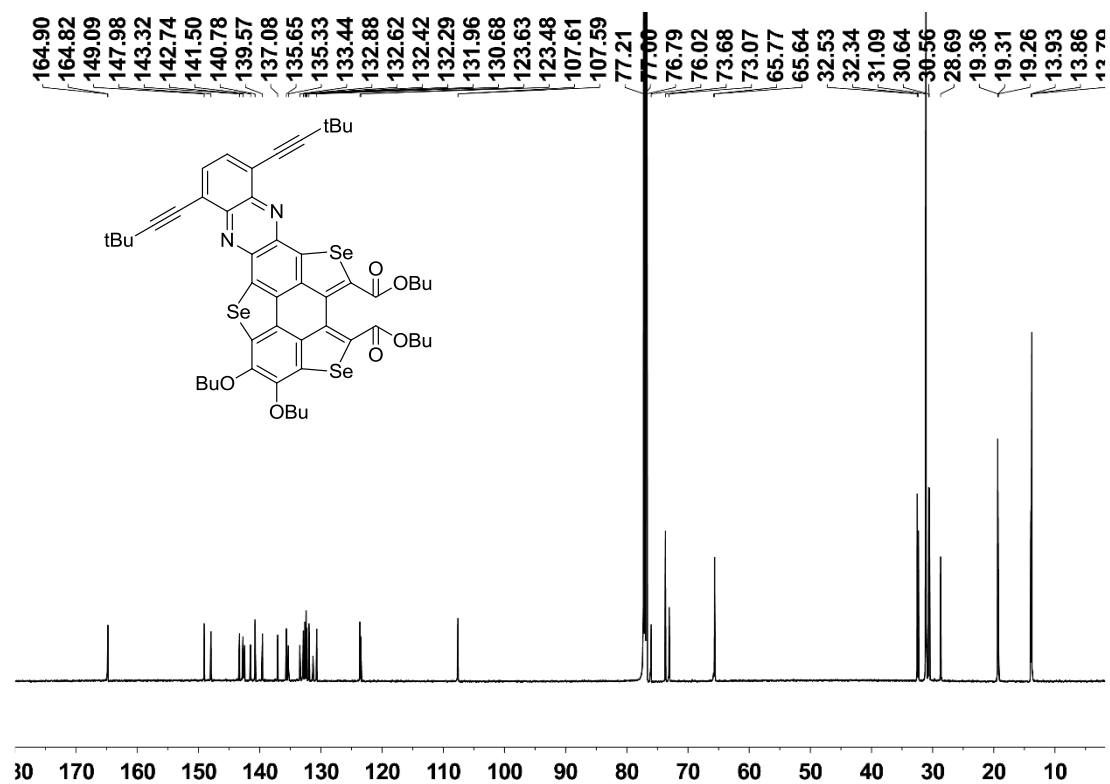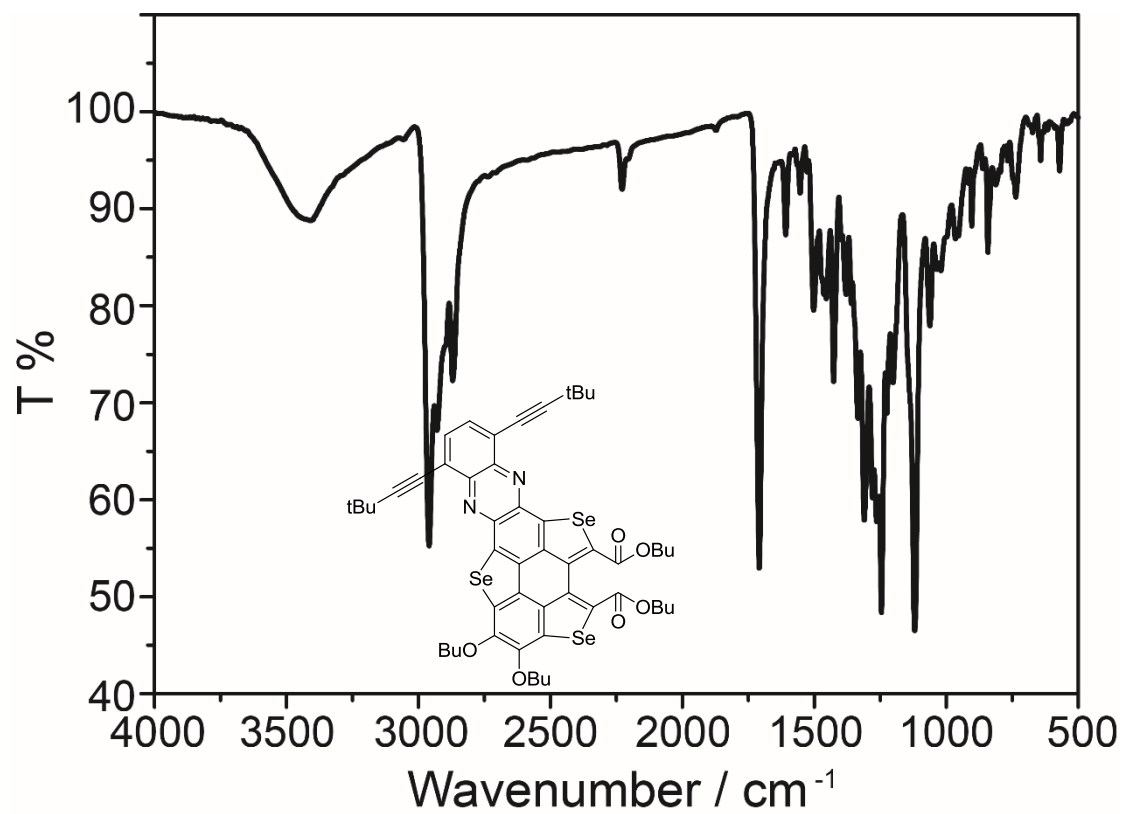

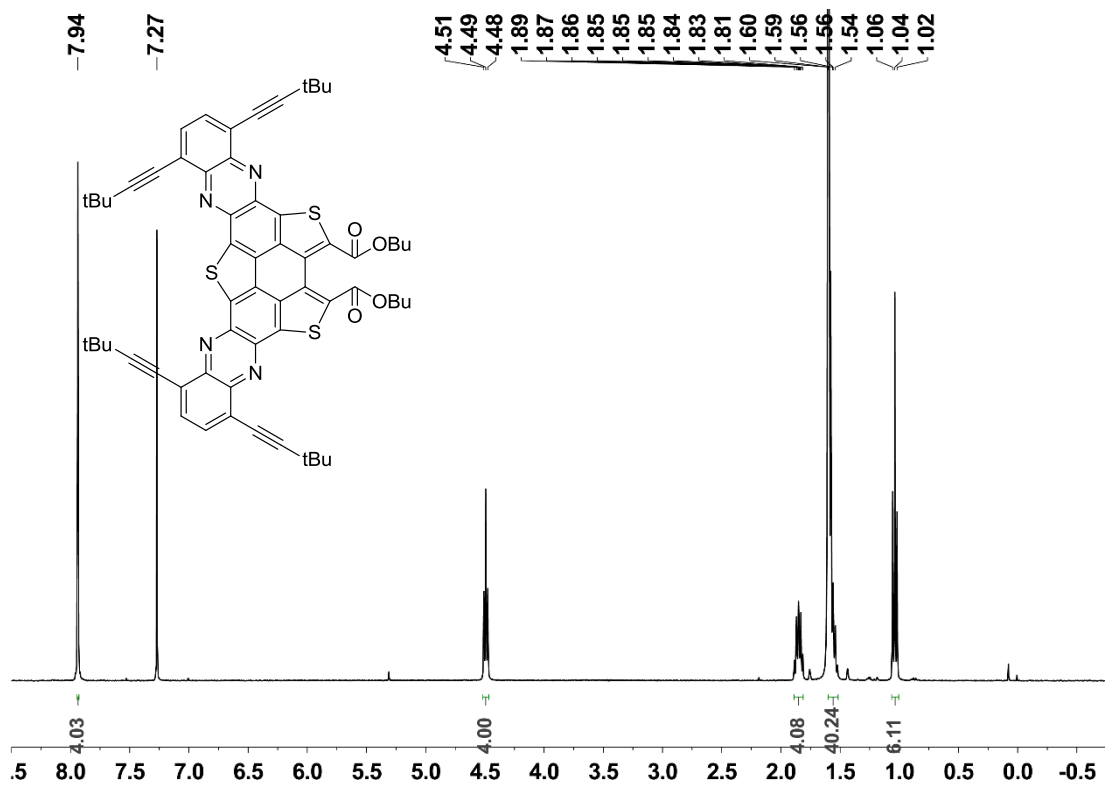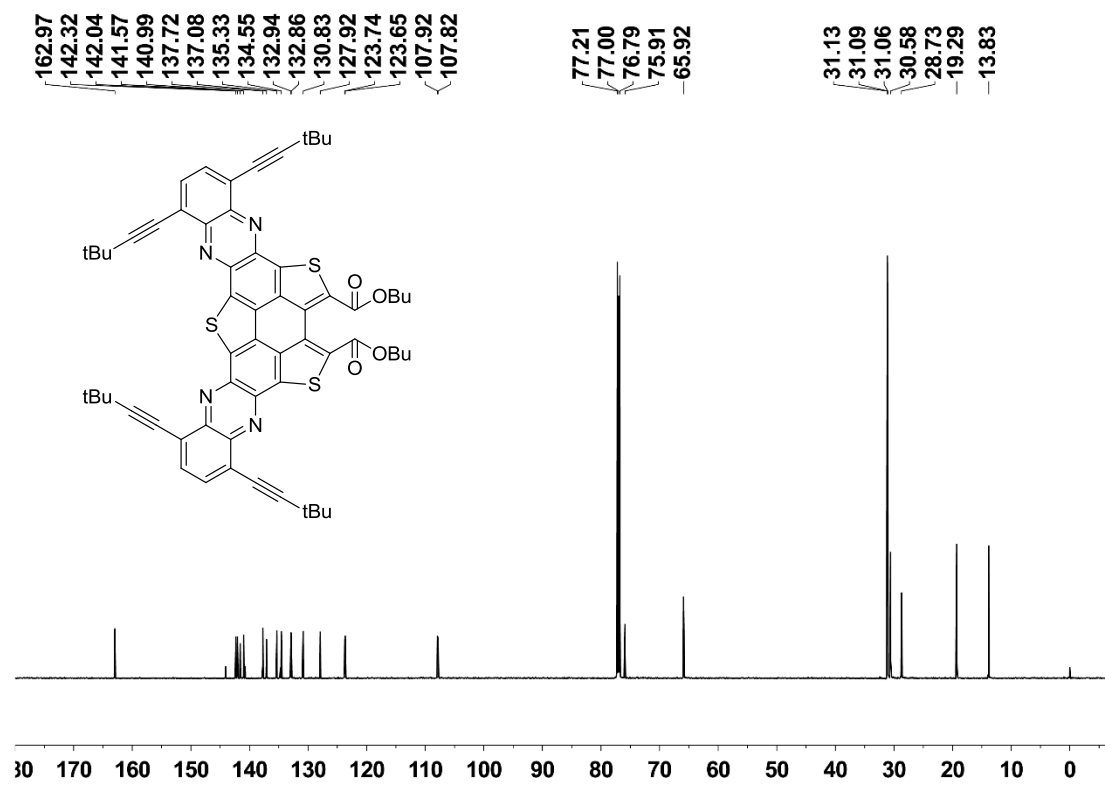

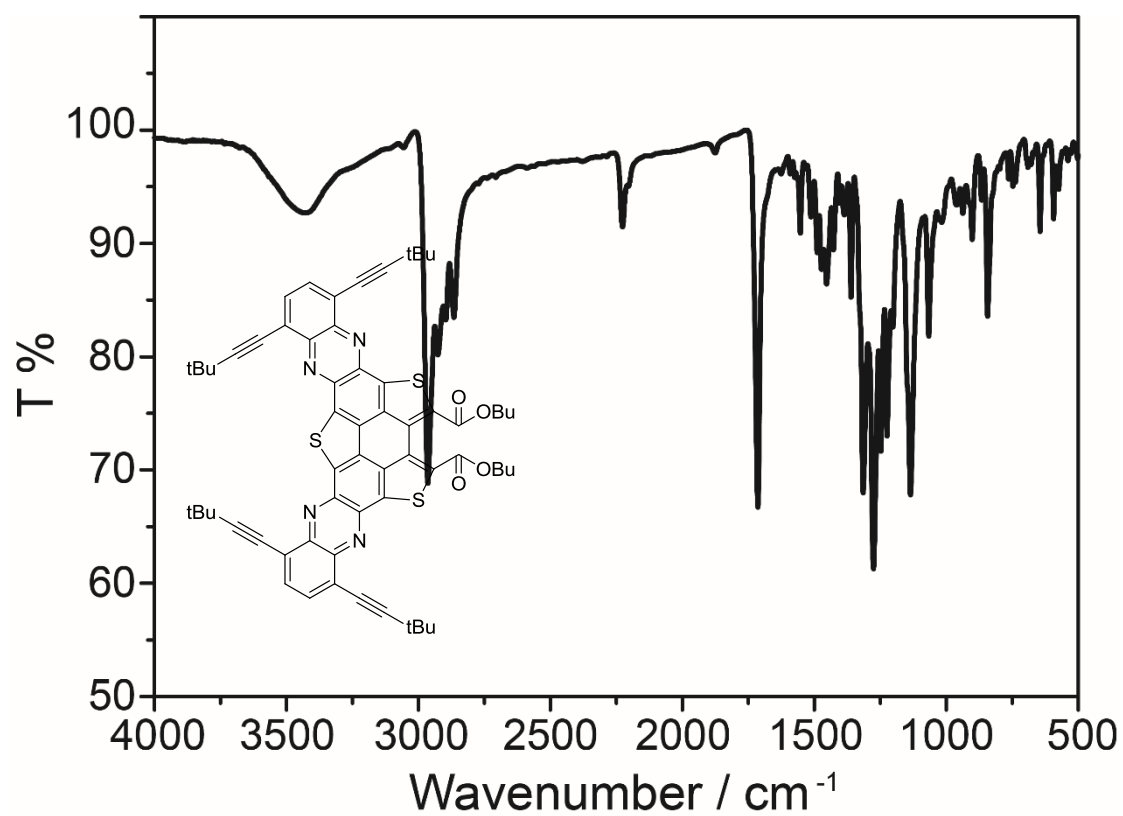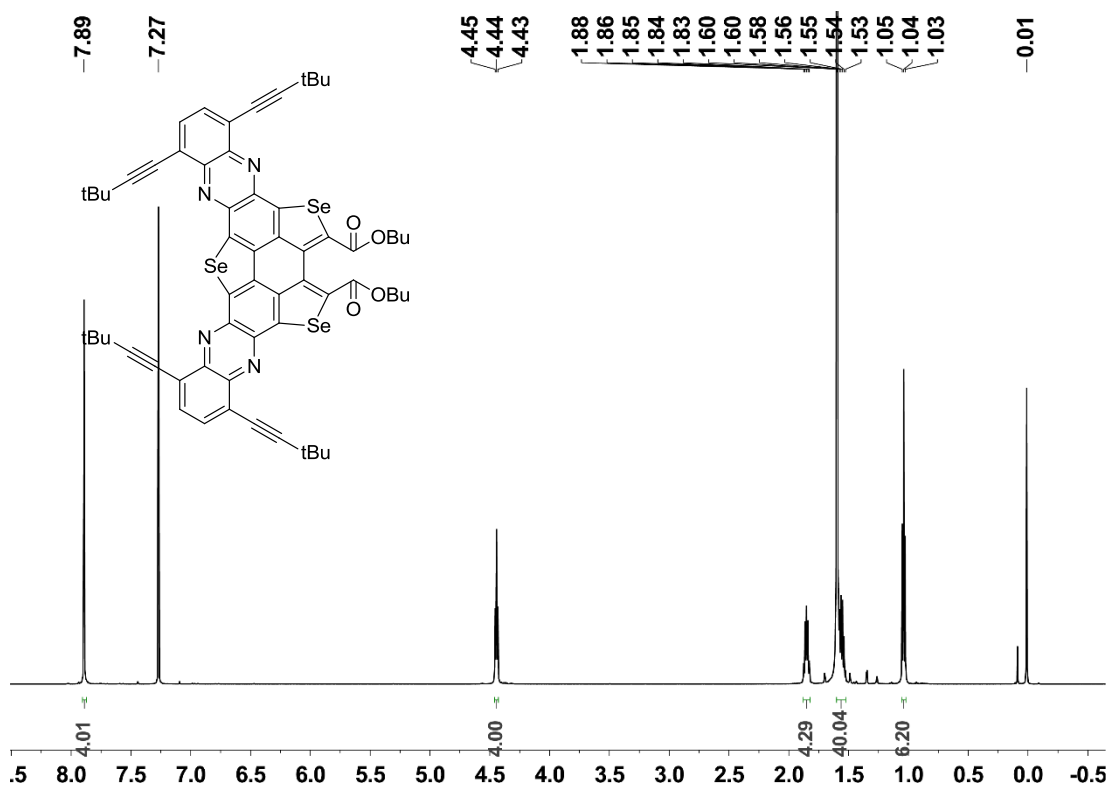

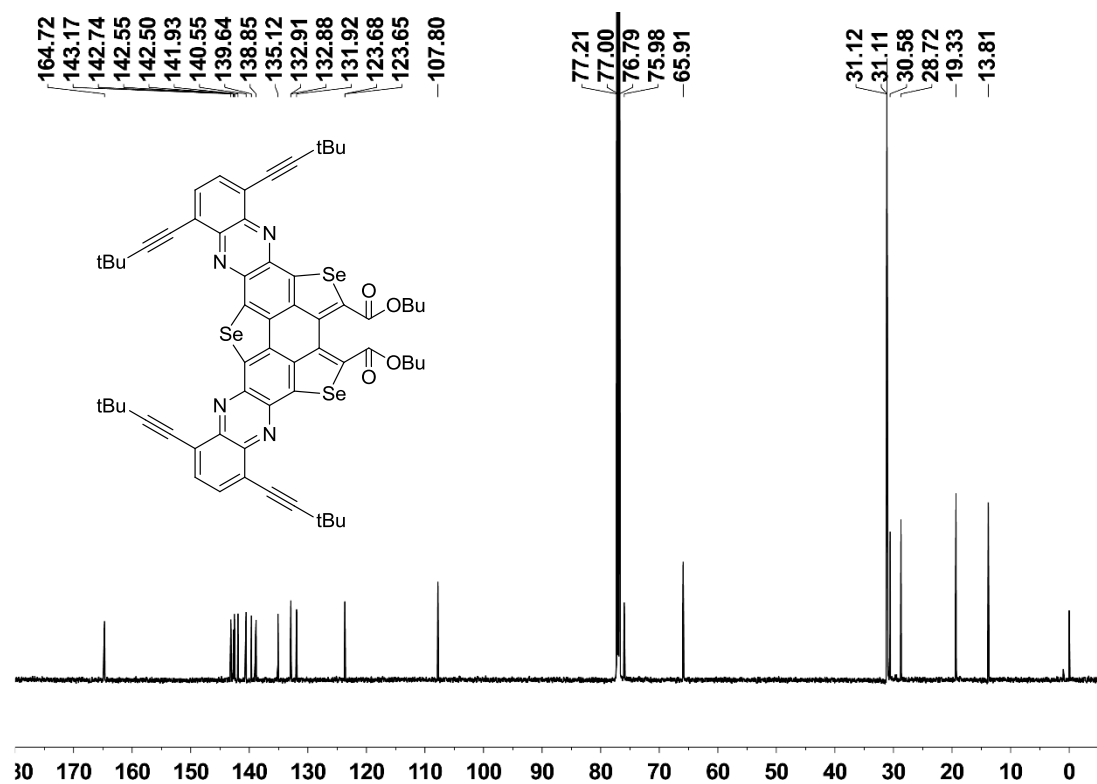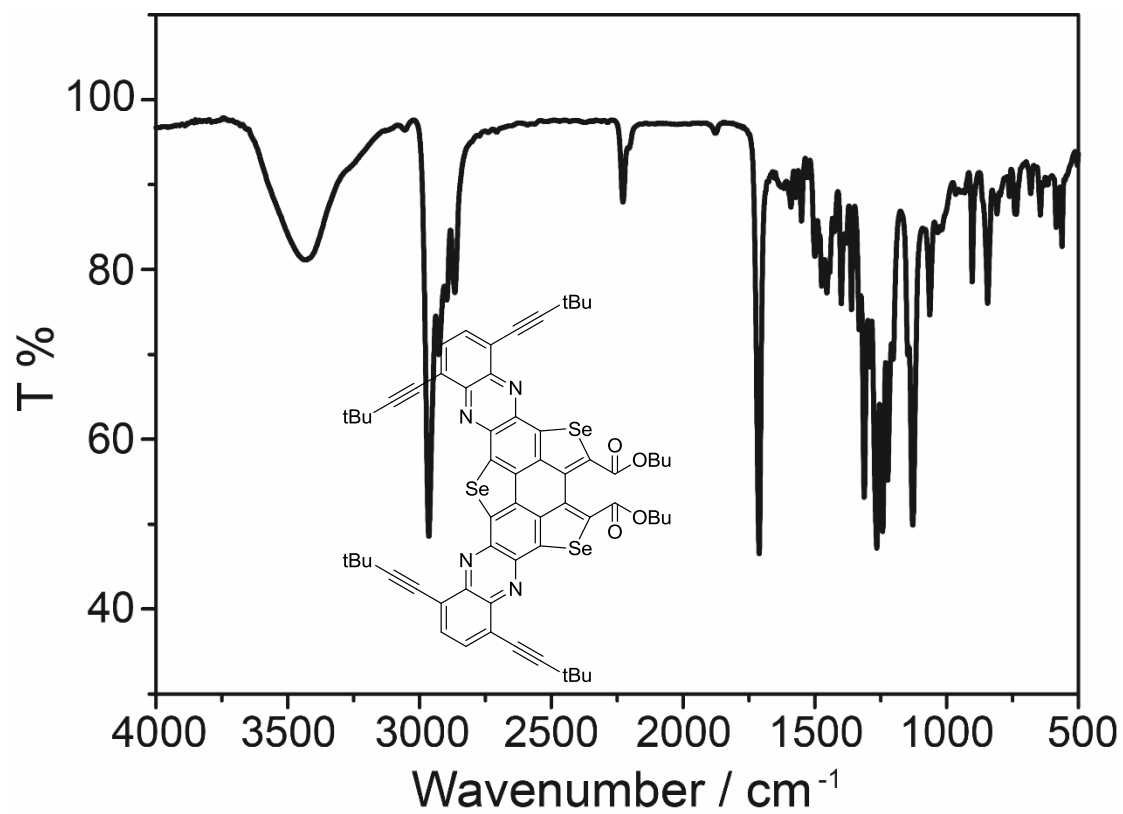

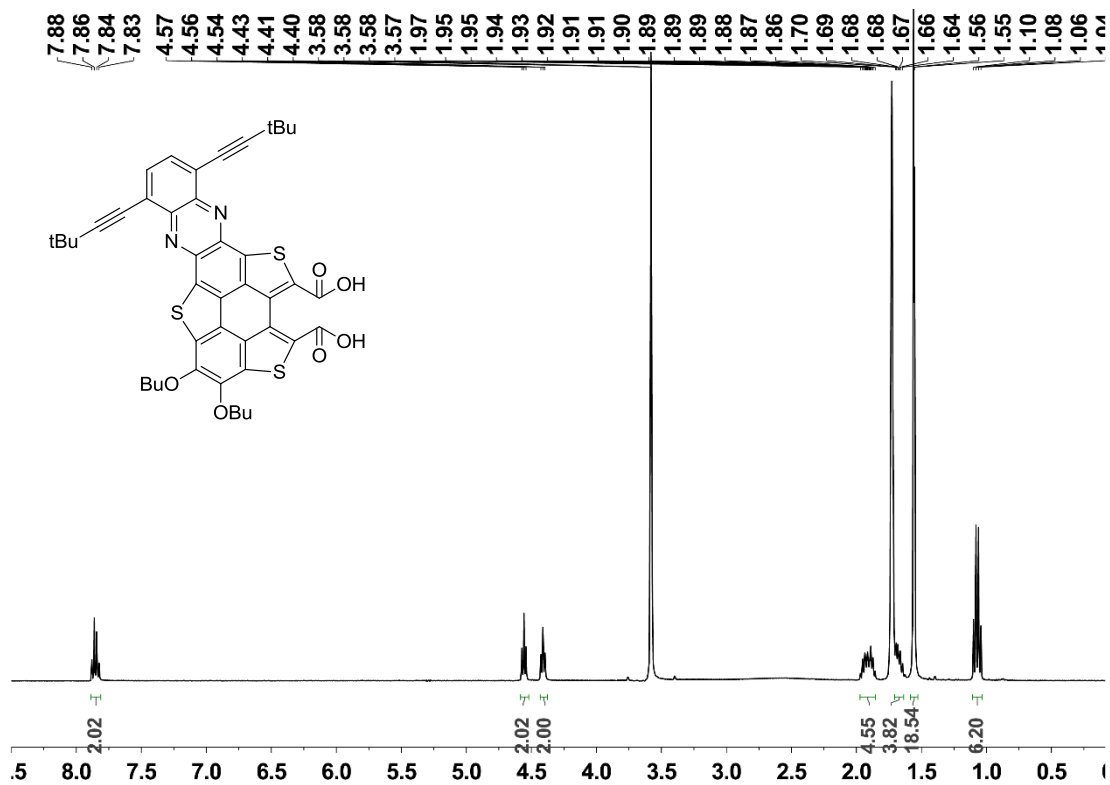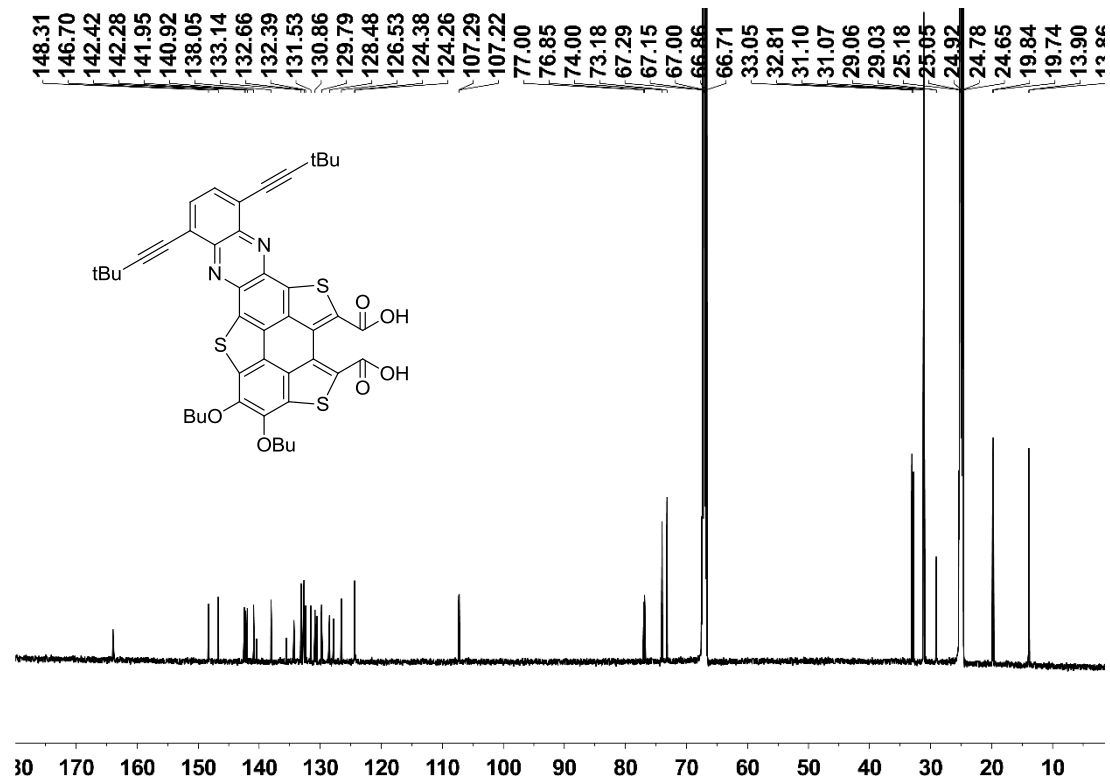

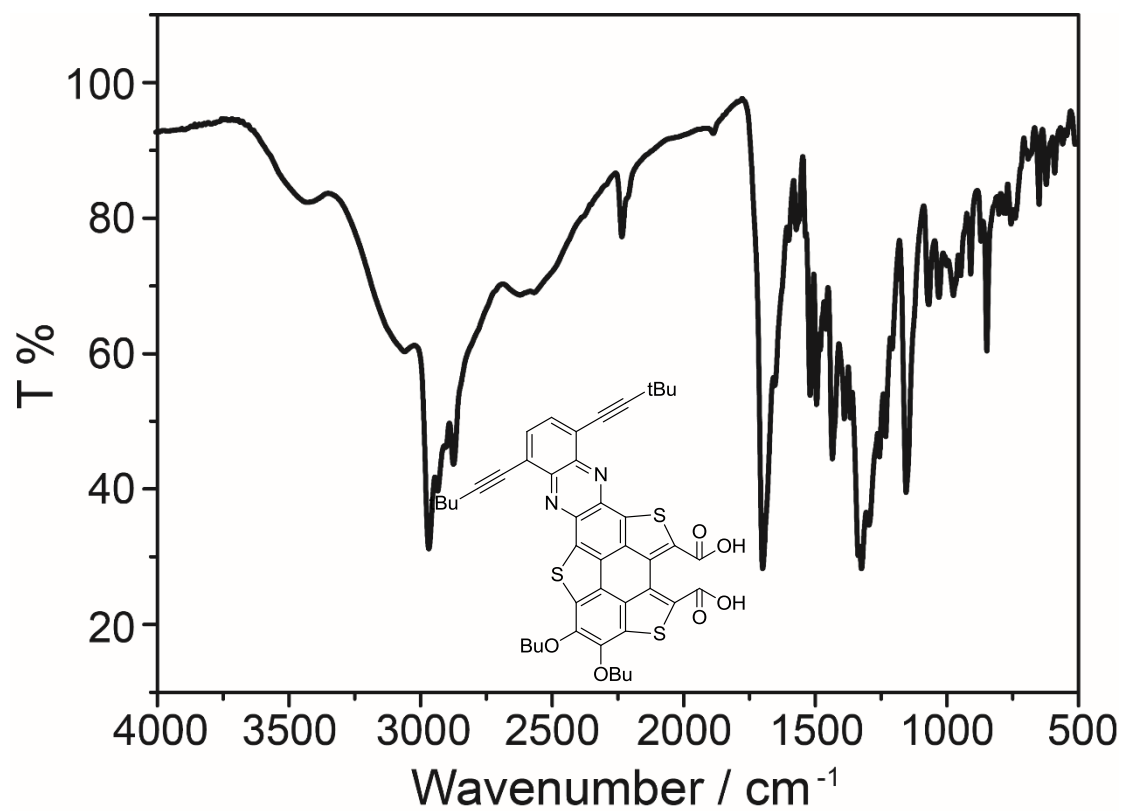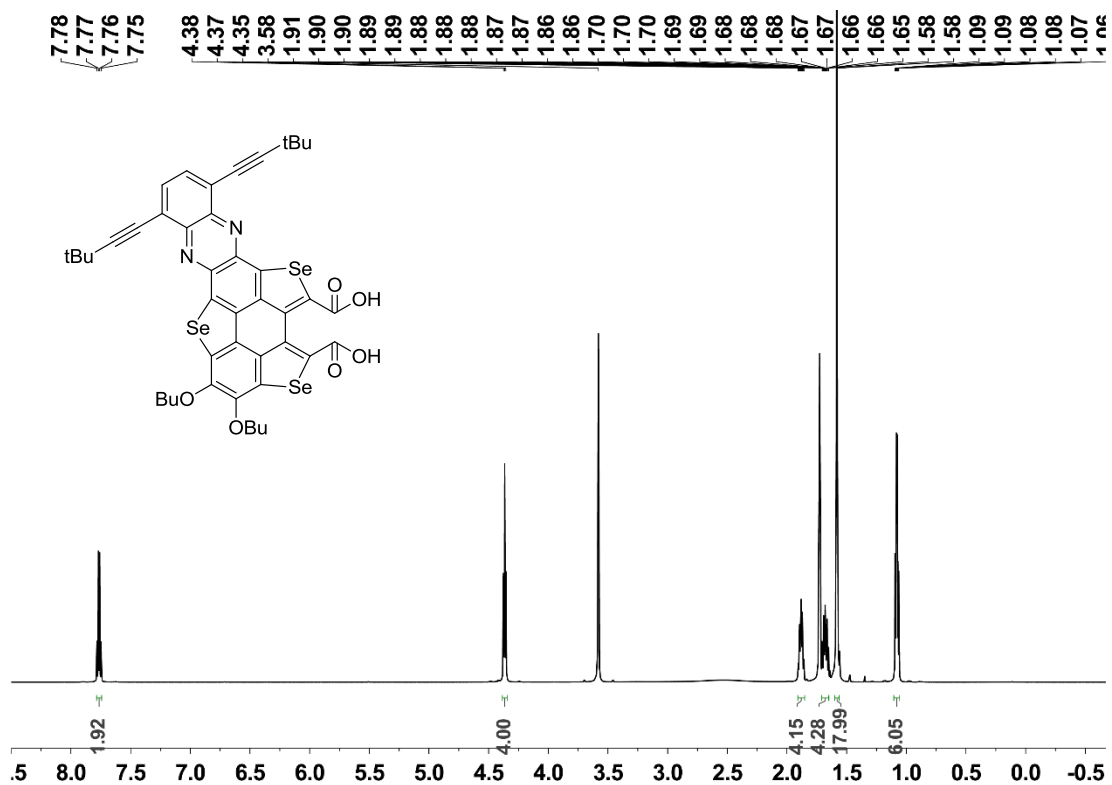

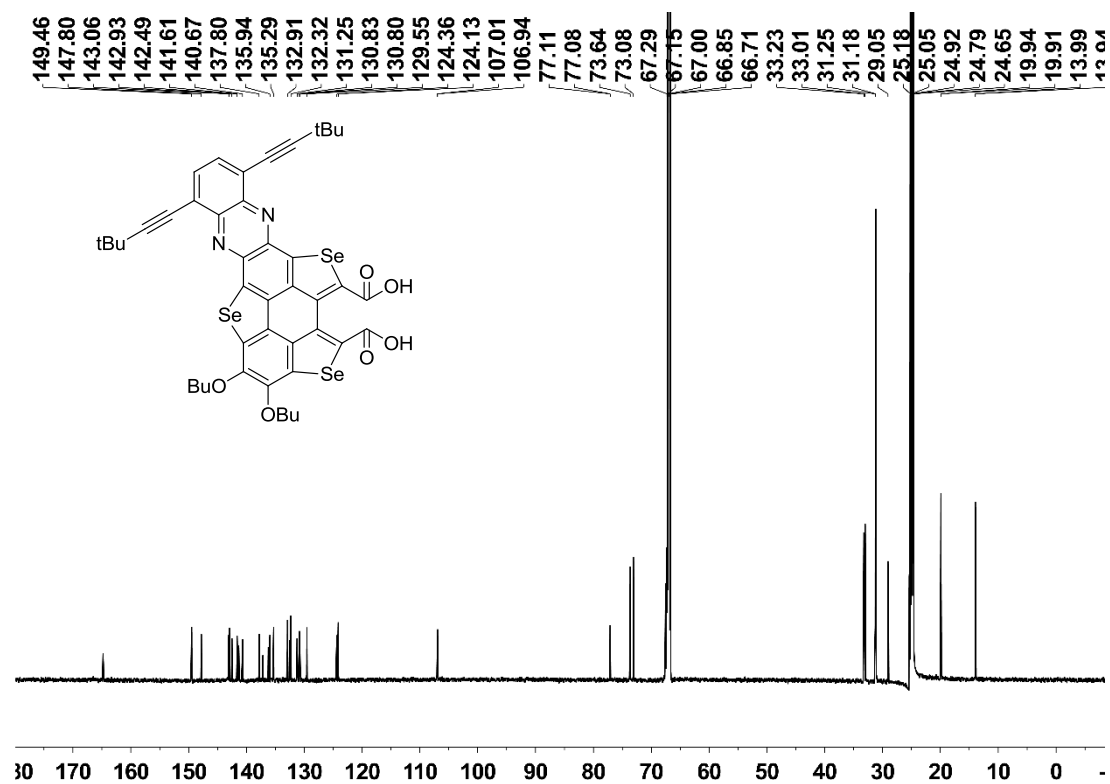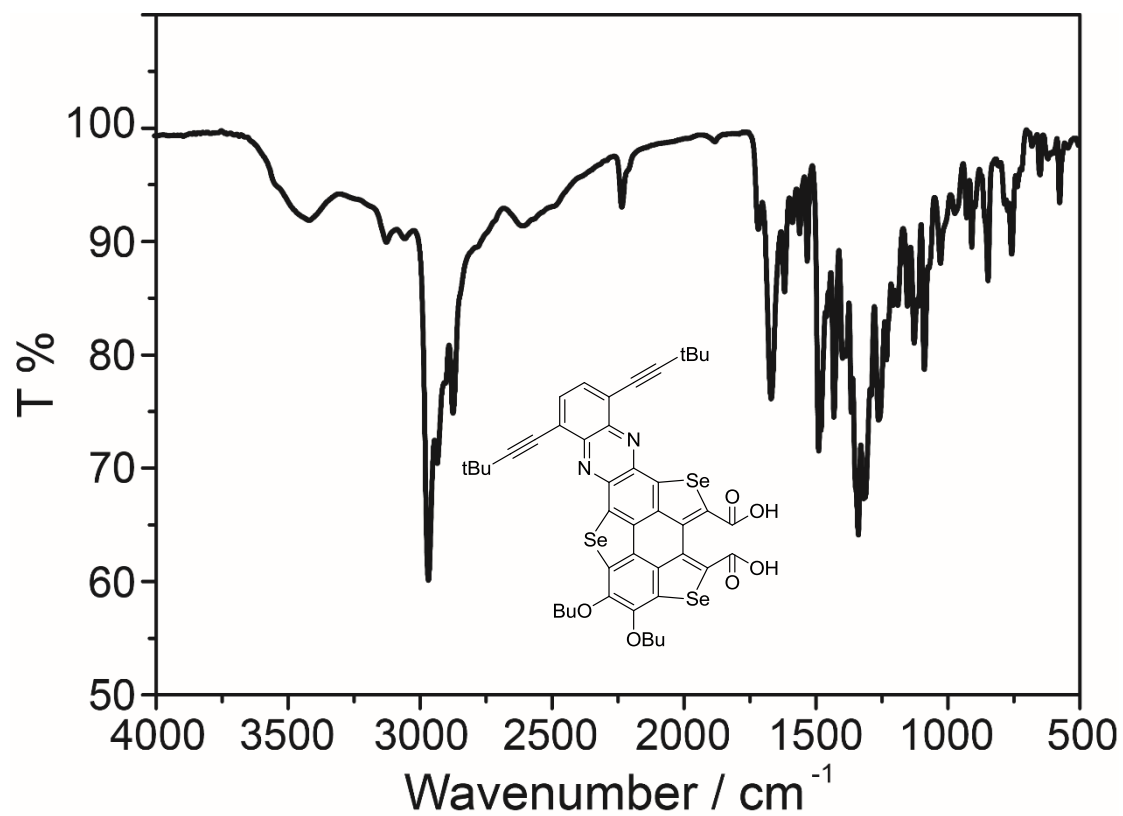



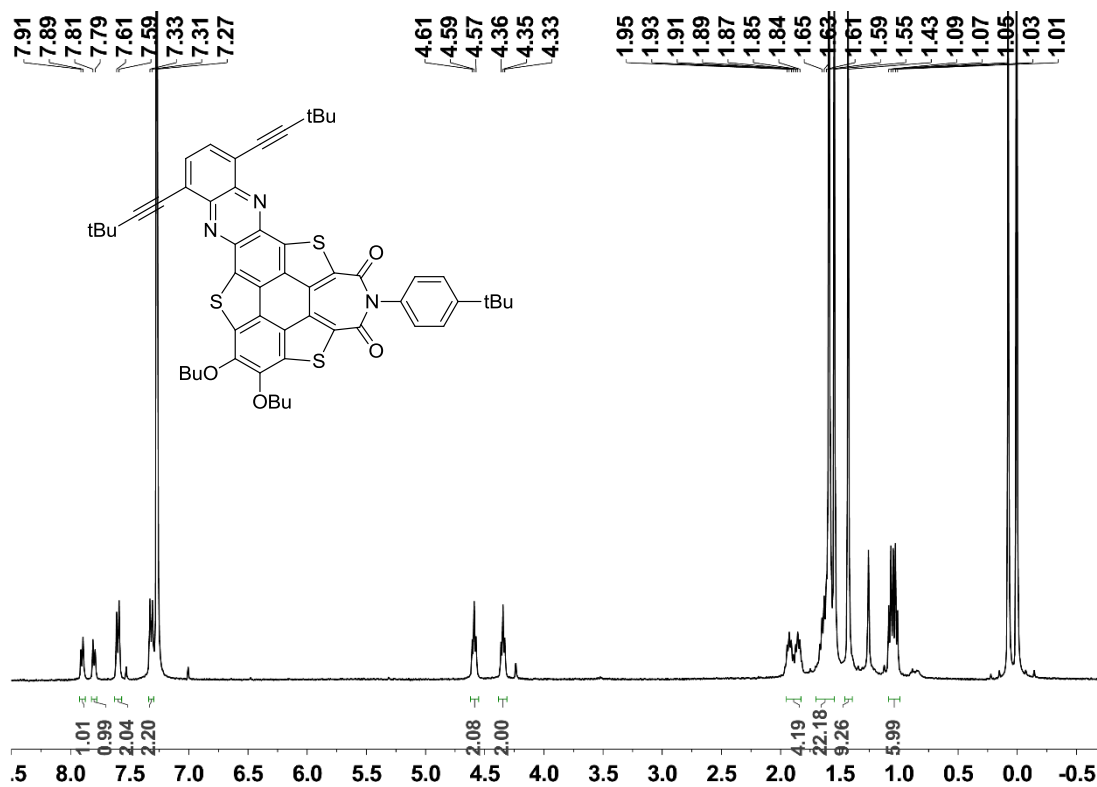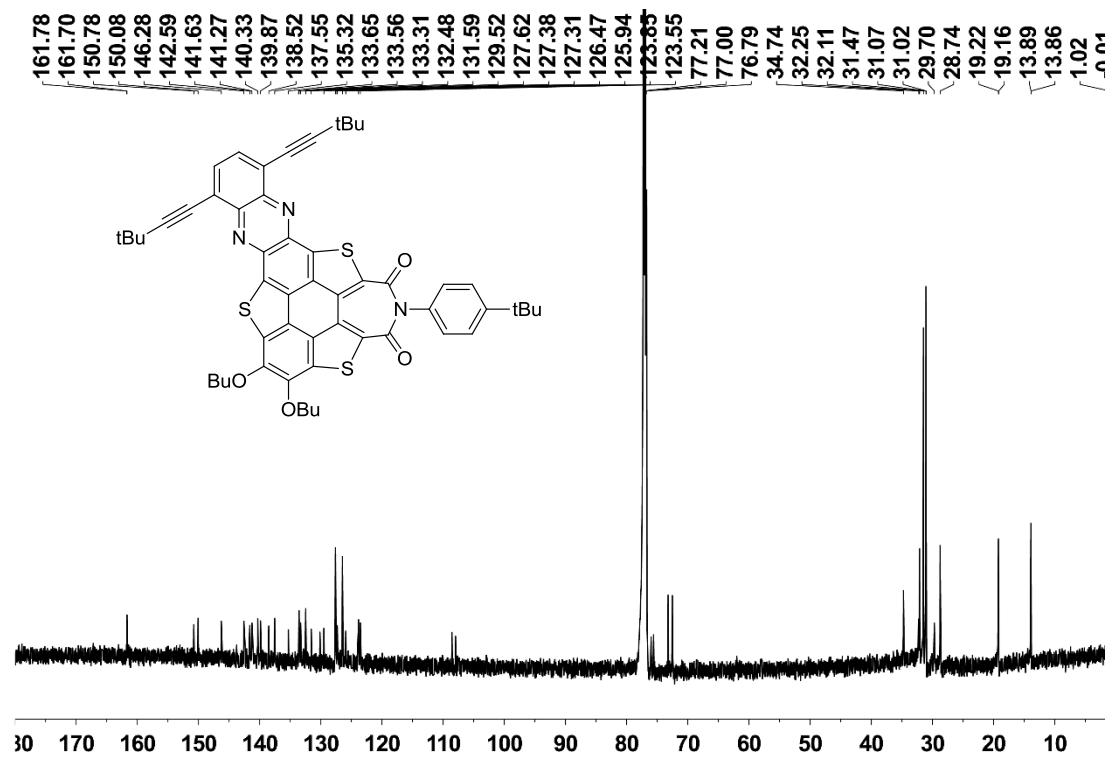

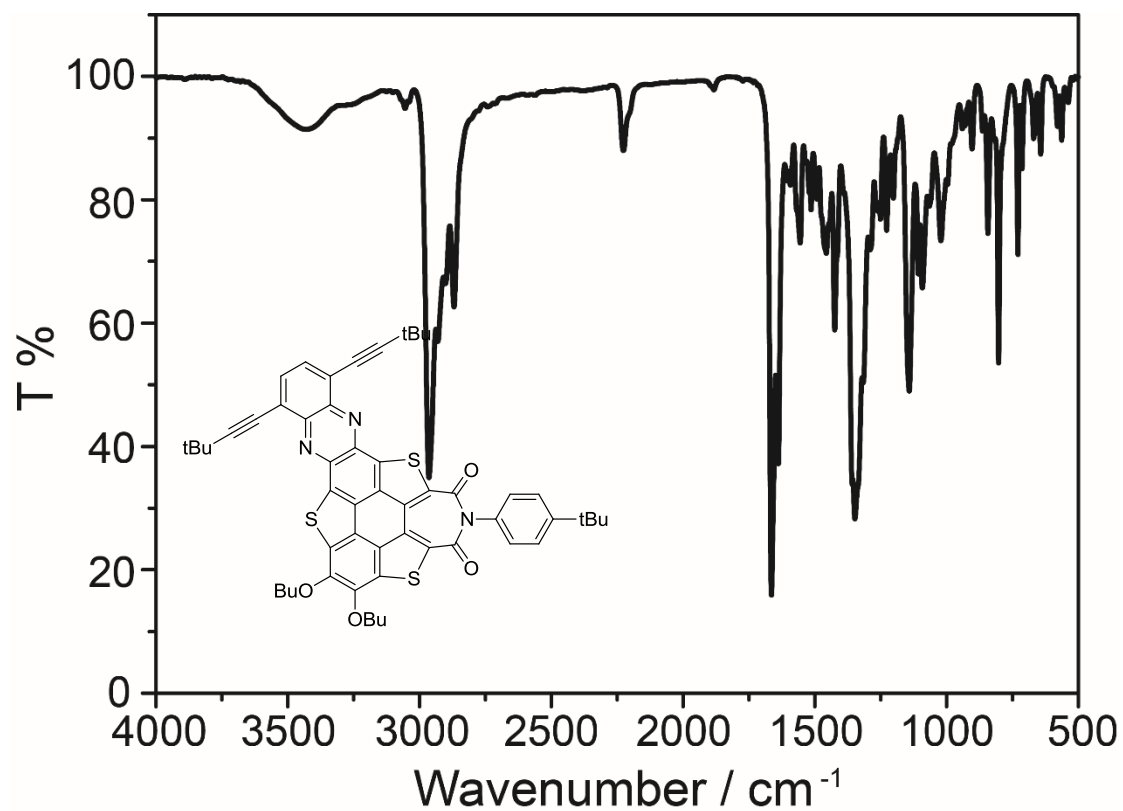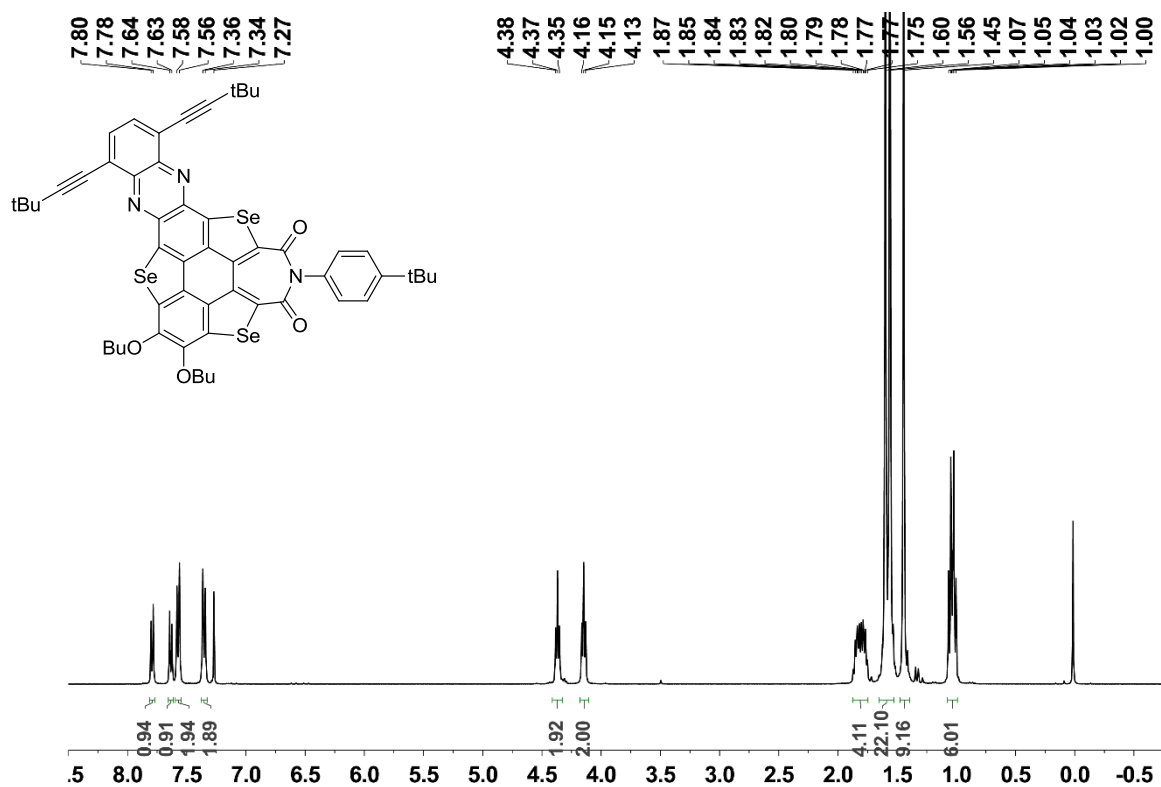

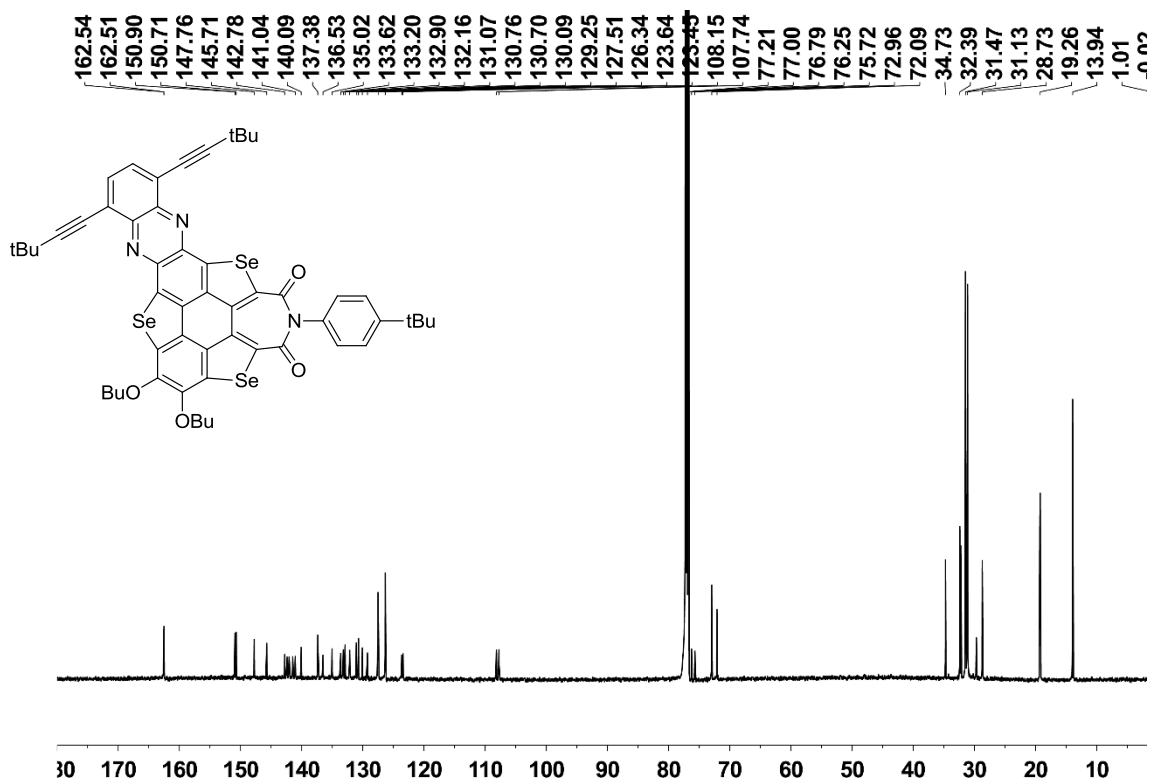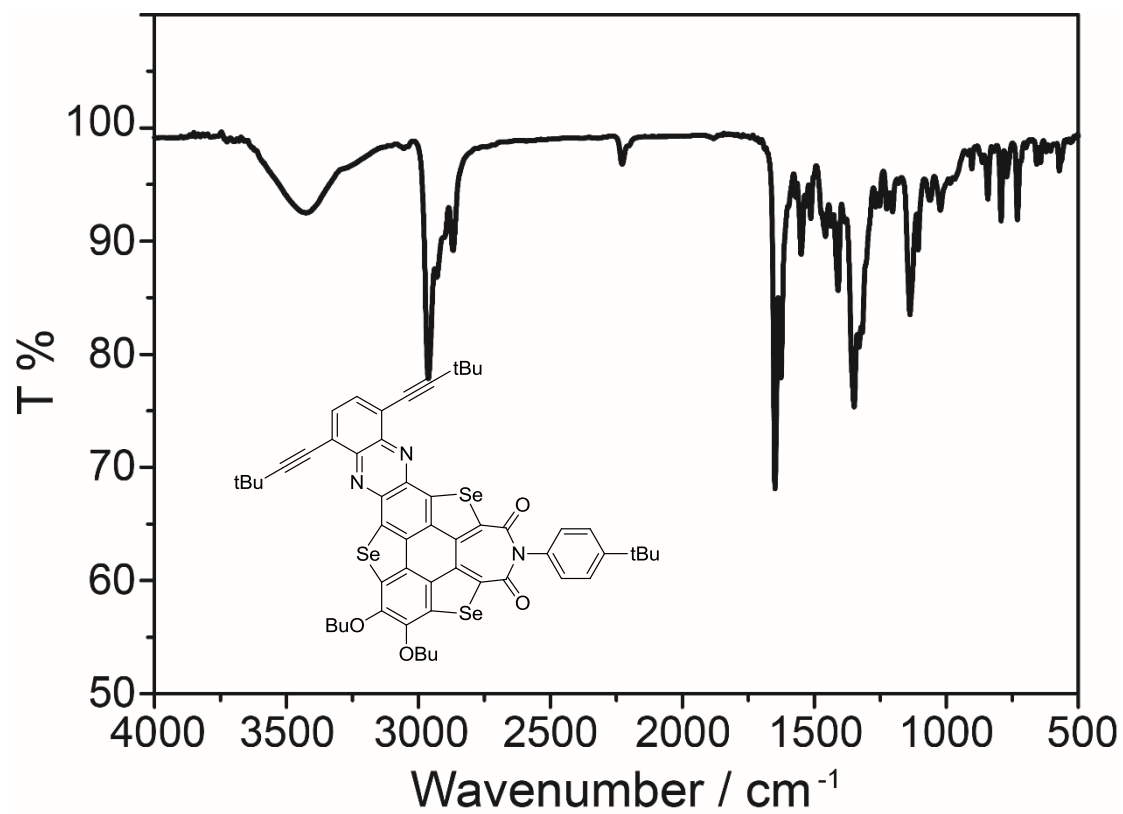

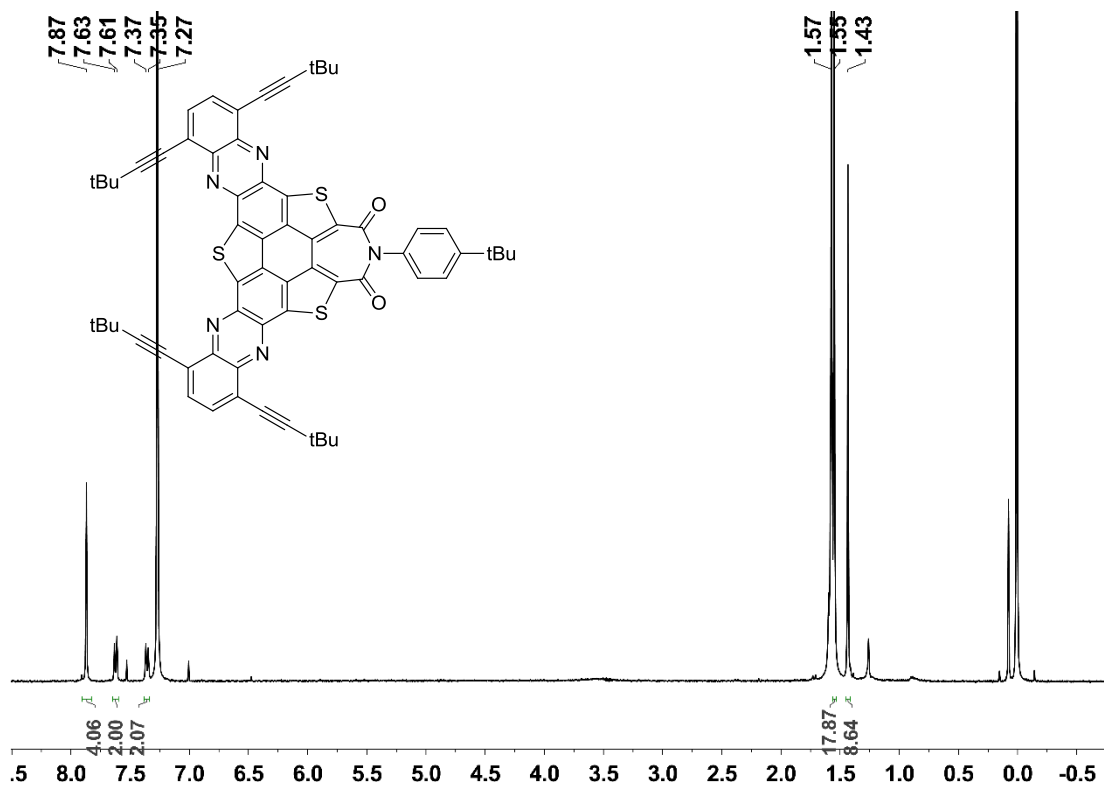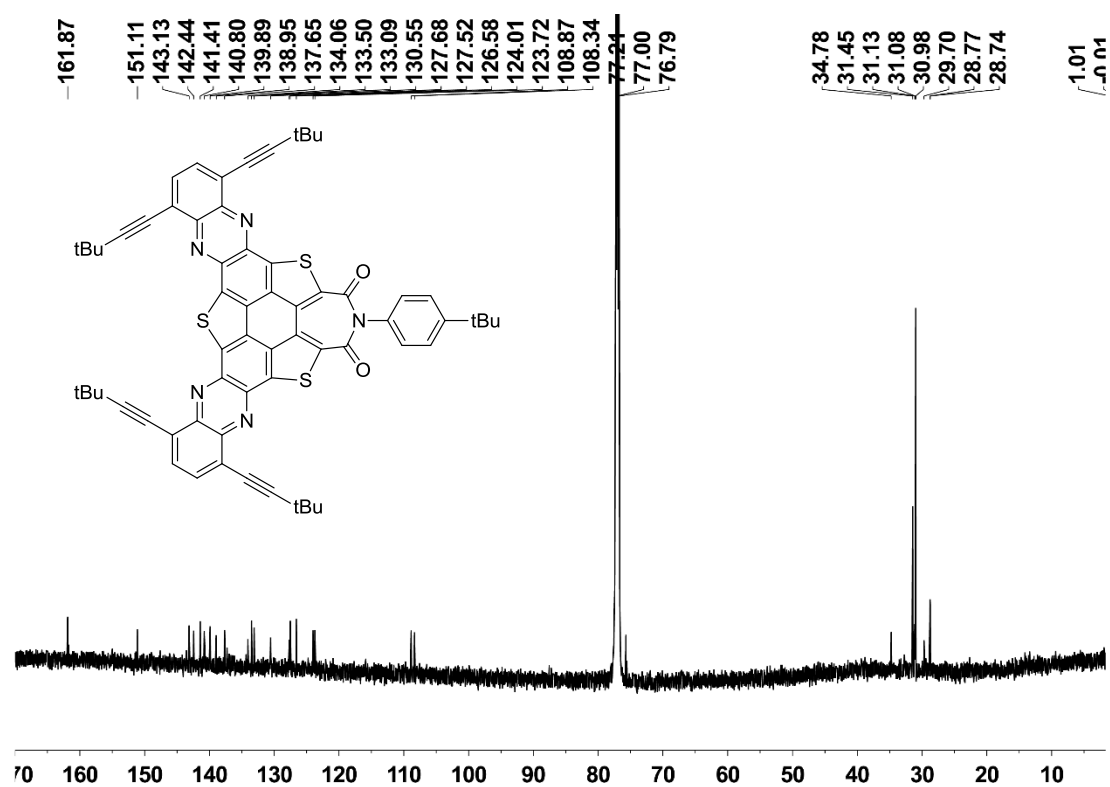

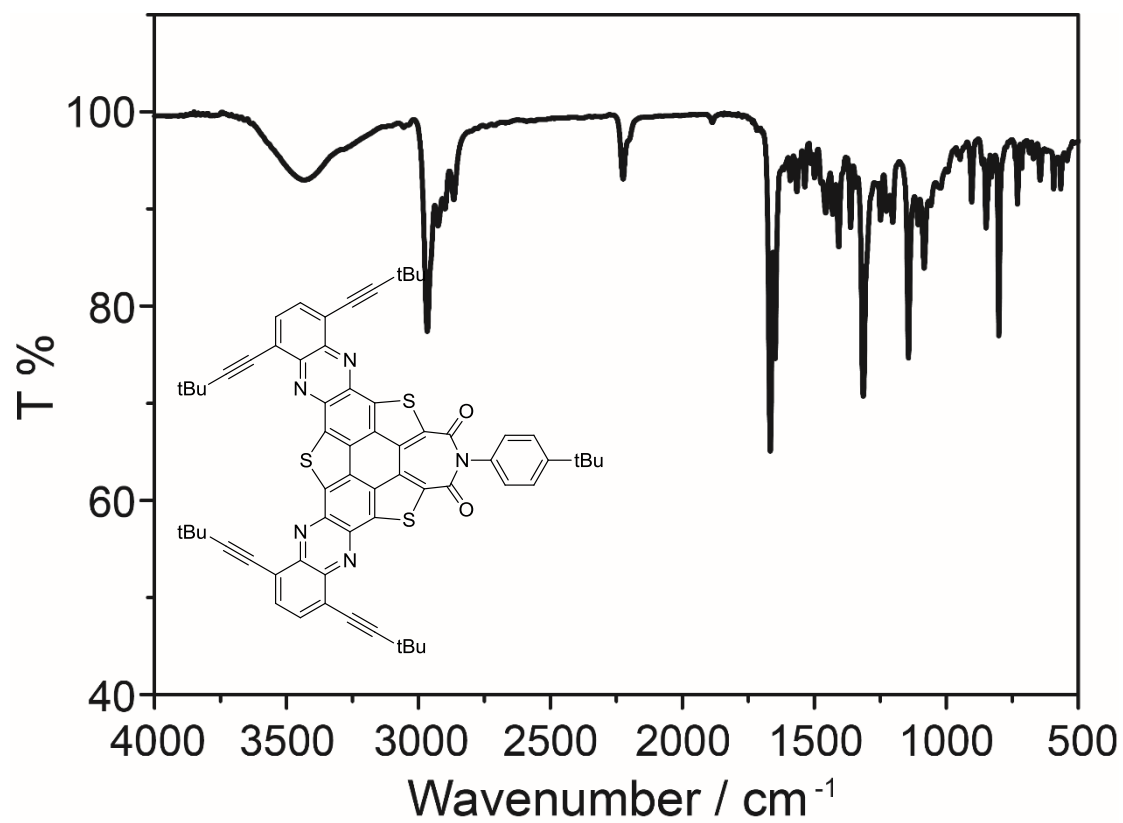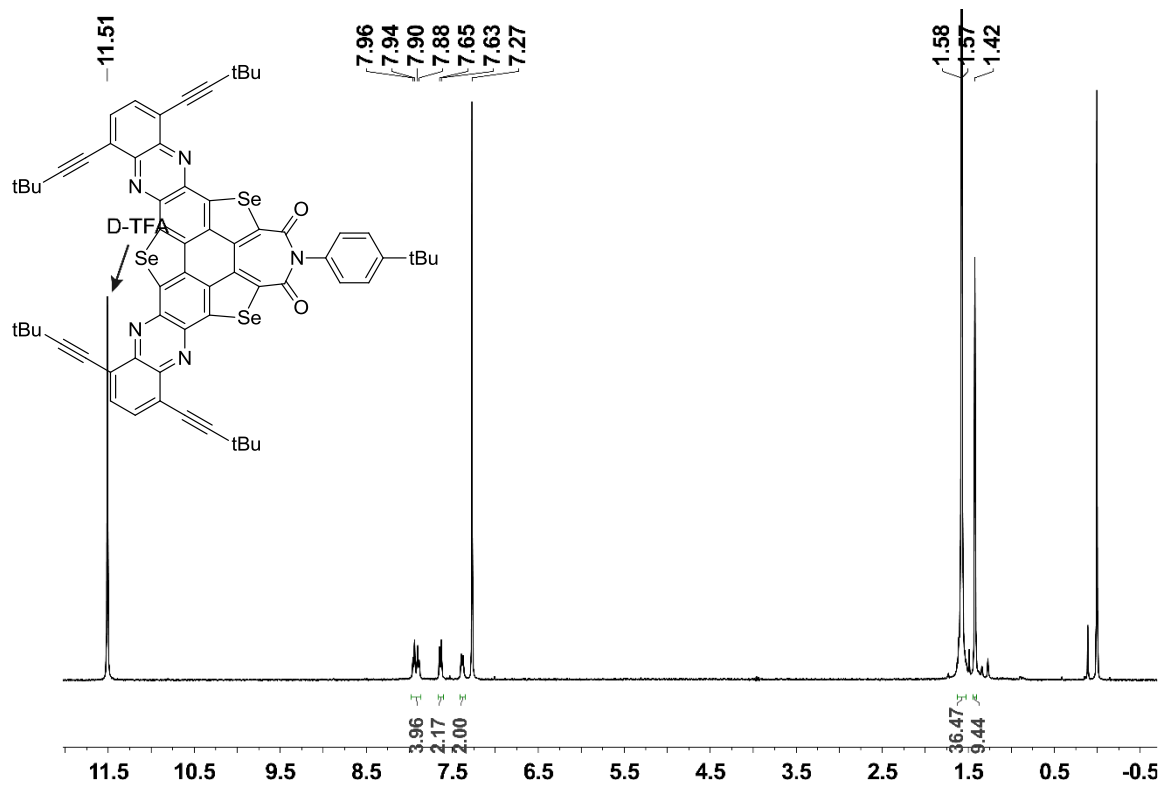

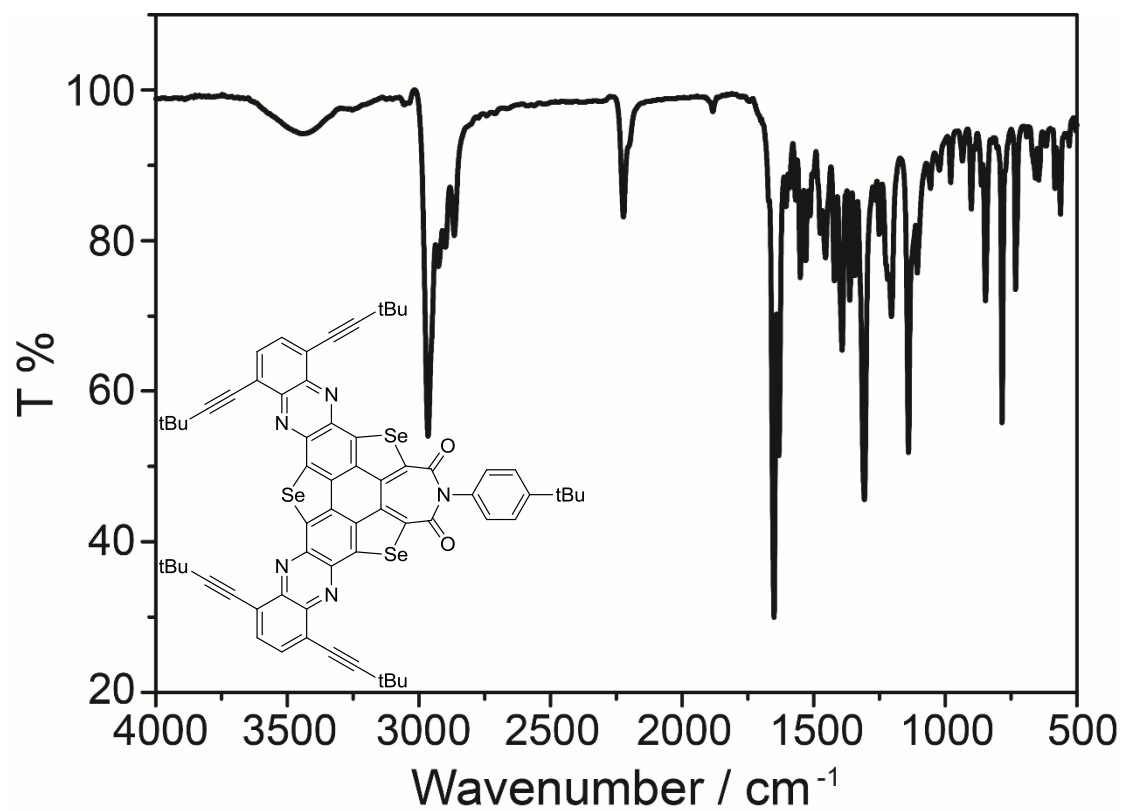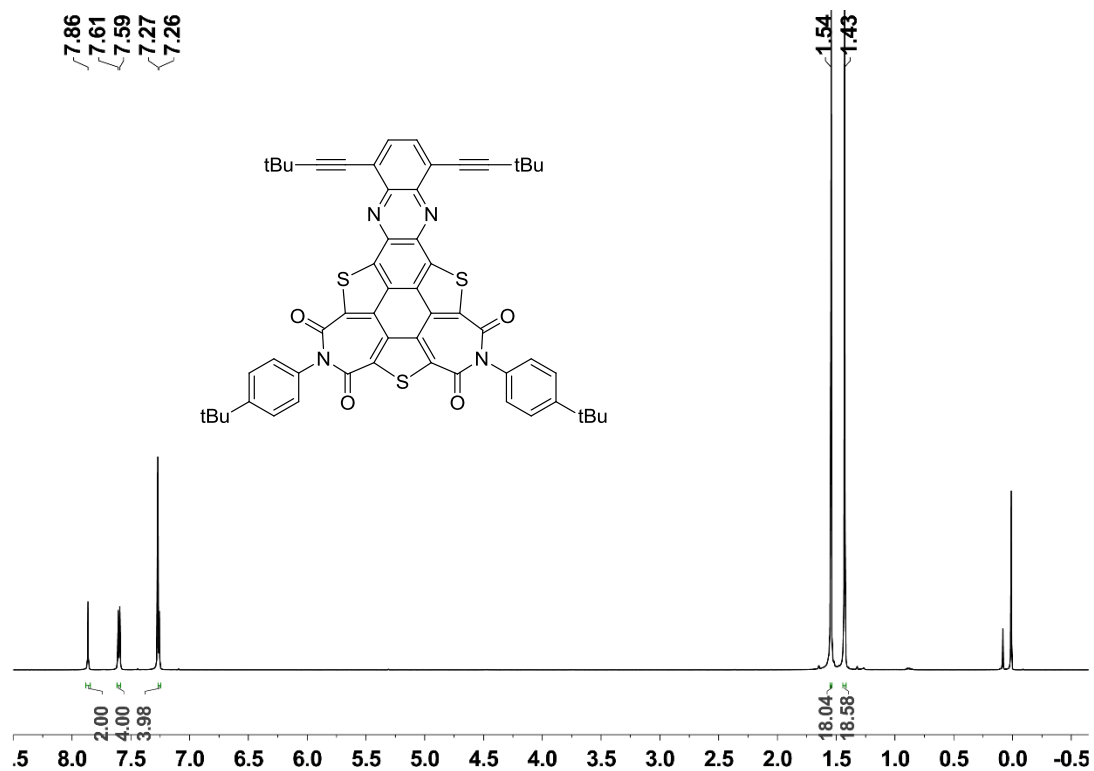

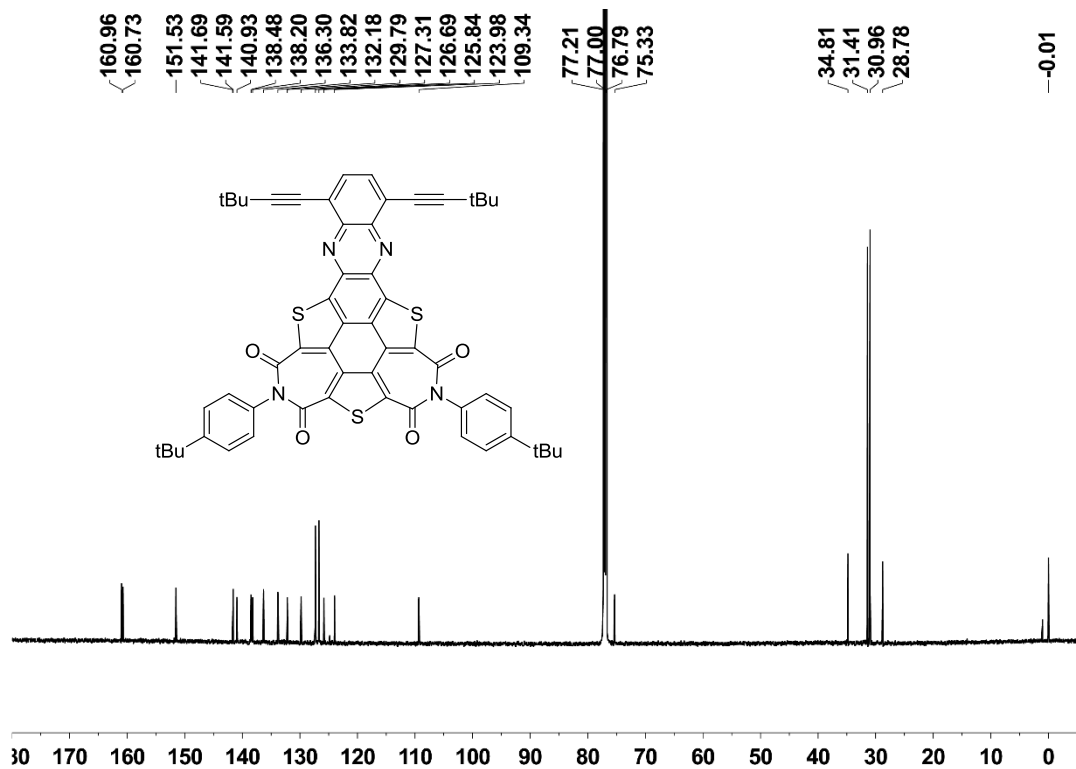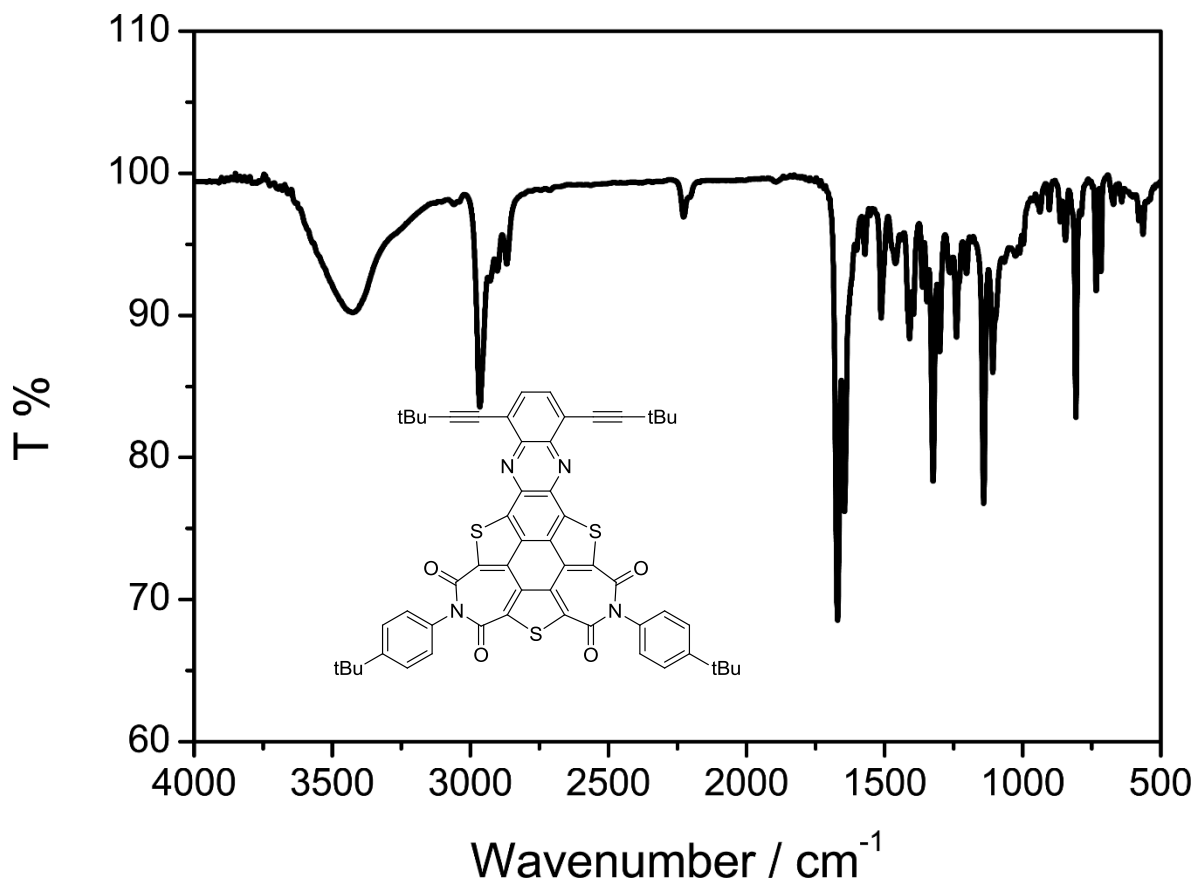

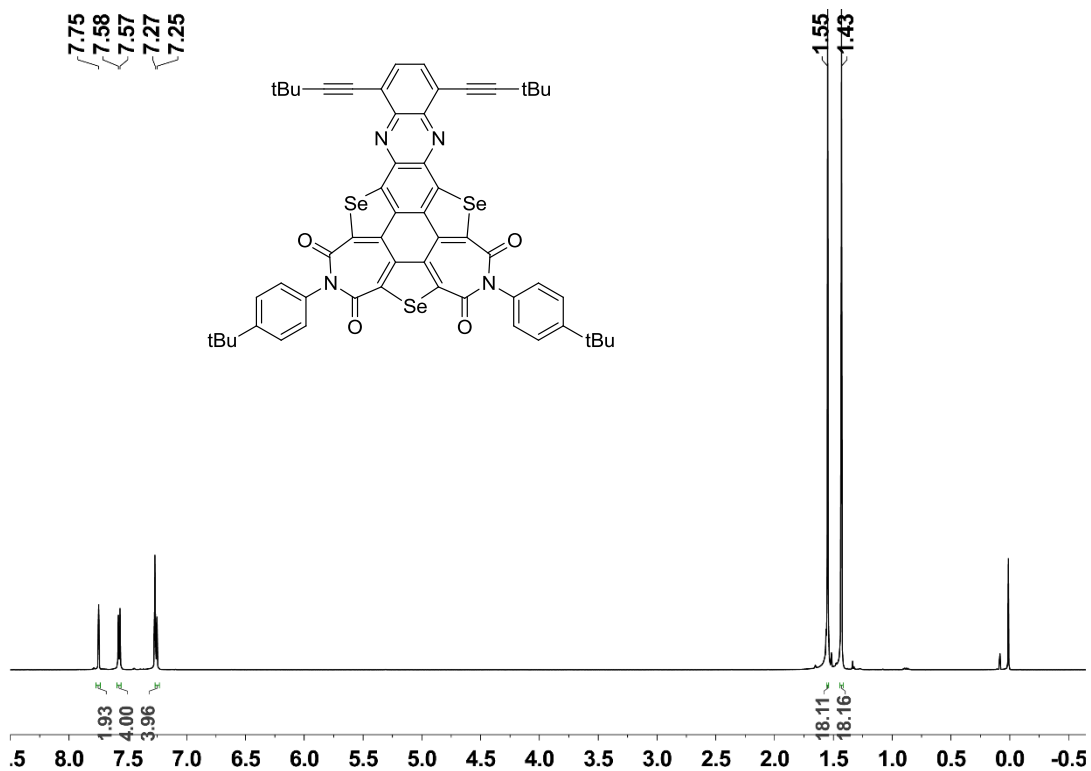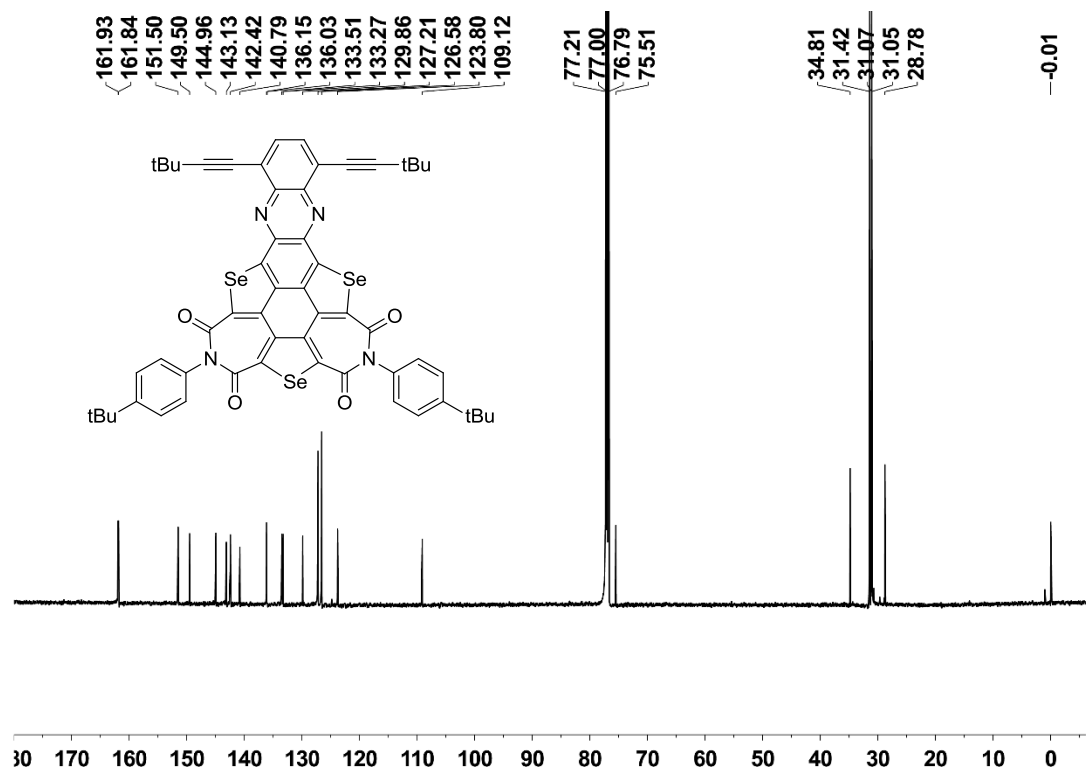



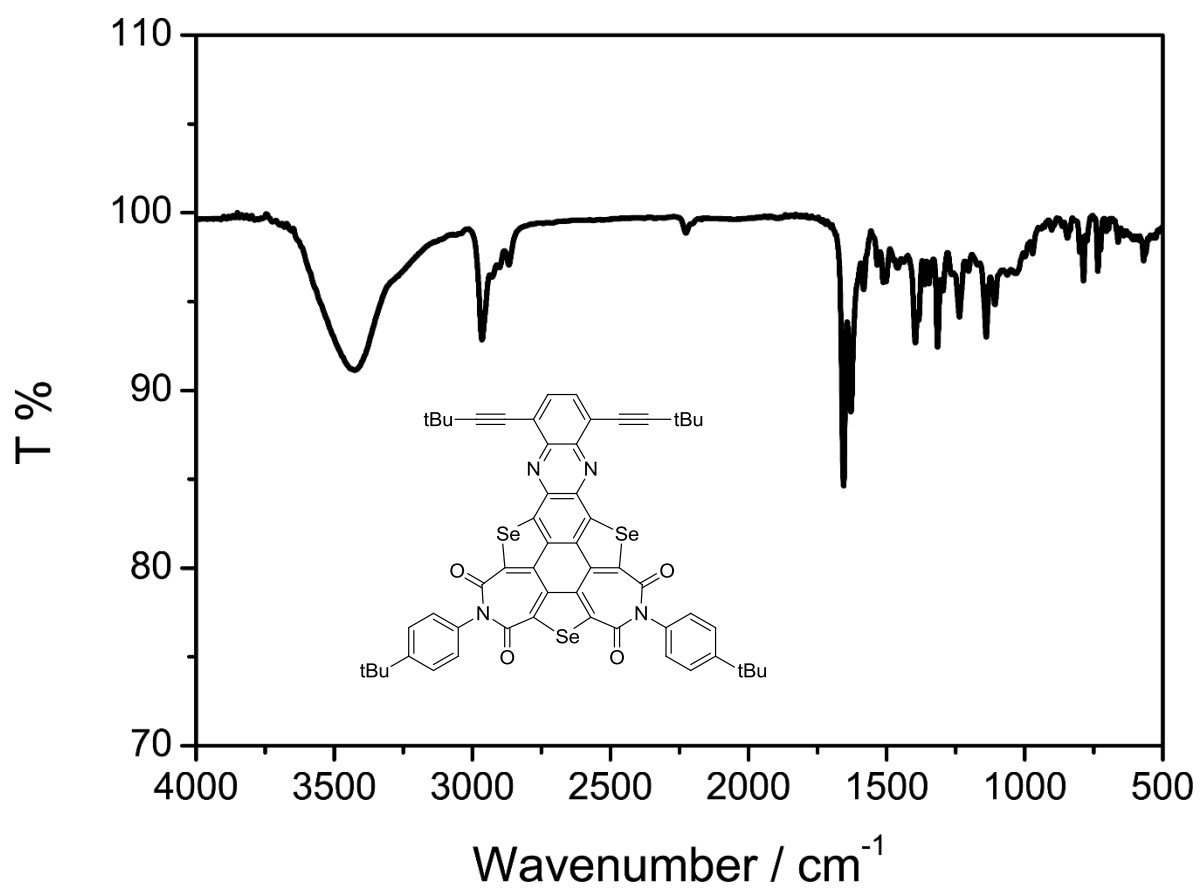

Supplement: d1qo00702e1.pdf [file d1qo00702e1.pdf]
